# Supplementary material for: Identifying a non-chiral ligand for the efficient chirality transfer in carbonylation of propargylic mesylates
Source: Royal Society of Chemistry journal article supplement (doi:10.1039/c4qo00151f), 2014-07-04
Supplement: c4qo00151f1.pdf [file c4qo00151f1.pdf]

Supporting Information

**Identifying a Non-Chiral Ligand for the Efficient Chirality  
Transfer in Carbonylation of Propargylic Mesylates**

Yuli Wang,<sup>†</sup> Wanli Zhang<sup>†</sup> and Shengming Ma<sup>\*,†,‡</sup>

<sup>†</sup> Shanghai Key Laboratory of Green Chemistry and Chemical Process, Department of  
Chemistry, East China Normal University, 3663 North Zhongshan Lu, Shanghai  
200062, P. R. China

<sup>‡</sup> State Key Laboratory of Organometallic Chemistry, Shanghai Institute of Organic  
Chemistry, Chinese Academy of Sciences, 345 lingling Lu, Shanghai 200032, P. R.  
China

Fax: (+86)21-62609305      E-mail: masm@sioc.ac.cn

|                                                                  |         |
|------------------------------------------------------------------|---------|
| General information                                              | S2      |
| Screening of ligands                                             | S3      |
| Experimental details and analytical data                         | S4-S17  |
| <sup>1</sup> H, <sup>13</sup> C NMR and HPLC spectra of products | S18-S96 |

**General Information.** NMR spectra were taken with Bruker-300 spectrometer (300 MHz for  $^1\text{H}$  NMR, 75.4 MHz for  $^{13}\text{C}$  NMR) and Bruker-400 spectrometer (400 MHz for  $^1\text{H}$  NMR, 100 MHz for  $^{13}\text{C}$  NMR) in  $\text{CDCl}_3$ . Chemical shifts were recorded in ppm relative to the residue of  $\text{CHCl}_3$  in  $\text{CDCl}_3$  and coupling constants were reported in Hz. All reactions were carried out in oven-dried tubes.  $(\text{NH}_4)_2\text{HPO}_4$  was purchased from Sinopharm Chemical Reagent Co., Ltd; DPEphos was purchased from Acros Chemicals. MTBE was dried over sodium wire with benzophenone as indicator and distilled freshly before use. The enantioenriched propargylic mesylates were synthesized from the corresponding enantiopure propargylic alcohols, and used without further purification. Purification by column chromatography was performed using Haiyang (Shandong, China) silica gel (10-40  $\mu$ ).

**Table S1 Pressure effect in DPEphos-assisted carboxylation of enantioenriched (S)-1a**

| <div style="display: flex; align-items: center; justify-content: space-around;"> <div style="text-align: center;"> 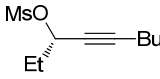 <p>(S)-<b>1a</b><br/>≥99% ee<br/>0.25 mmol</p> </div> <div style="text-align: center;"> <p> <math>\text{Pd(dba)}_2</math> (3 mol%)<br/> DPEphos (3 mol%)<br/> <math>(\text{NH}_4)_2\text{HPO}_4</math> (1.1 equiv)<br/> BnOH (10 equiv)<br/> MTBE (2 mL)<br/> 25 °C, CO (X psi), 9 h </p> </div> <div style="text-align: center;">  <p>(R)-<b>2a</b></p> </div> <div style="text-align: center;">  <p>DPEphos</p> </div> </div> |         |                                                      |                                                   |
|-----------------------------------------------------------------------------------------------------------------------------------------------------------------------------------------------------------------------------------------------------------------------------------------------------------------------------------------------------------------------------------------------------------------------------------------------------------------------------------------------------------------------------------------------------------------------------------------------------------------------------------------------------------------------------------------------------------------------------------------------------------------------------------------------------------|---------|------------------------------------------------------|---------------------------------------------------|
| Entry                                                                                                                                                                                                                                                                                                                                                                                                                                                                                                                                                                                                                                                                                                                                                                                                     | X (psi) | Yield% of (R <sub>a</sub> )- <b>2a</b> <sup>a)</sup> | Ee% of (R <sub>a</sub> )- <b>2a</b> <sup>b)</sup> |
| 1                                                                                                                                                                                                                                                                                                                                                                                                                                                                                                                                                                                                                                                                                                                                                                                                         | 15      | 75                                                   | 87                                                |
| 2                                                                                                                                                                                                                                                                                                                                                                                                                                                                                                                                                                                                                                                                                                                                                                                                         | 40      | 74                                                   | 86                                                |
| 3                                                                                                                                                                                                                                                                                                                                                                                                                                                                                                                                                                                                                                                                                                                                                                                                         | 60      | 79                                                   | 95                                                |
| 4                                                                                                                                                                                                                                                                                                                                                                                                                                                                                                                                                                                                                                                                                                                                                                                                         | 80      | 76                                                   | 96                                                |
| 5                                                                                                                                                                                                                                                                                                                                                                                                                                                                                                                                                                                                                                                                                                                                                                                                         | 100     | 74                                                   | 97                                                |
| 6                                                                                                                                                                                                                                                                                                                                                                                                                                                                                                                                                                                                                                                                                                                                                                                                         | 200     | 82                                                   | 97                                                |

<sup>a)</sup> Isolated yield. <sup>b)</sup> ee value of the product as determined by HPLC.

## Experimental details and analytical data

### (1) Preparation of (*R<sub>a</sub>*)-benzyl 2-butyl-2,3-hexadienoate ((*R<sub>a</sub>*)-2a) (zwl-1-92)

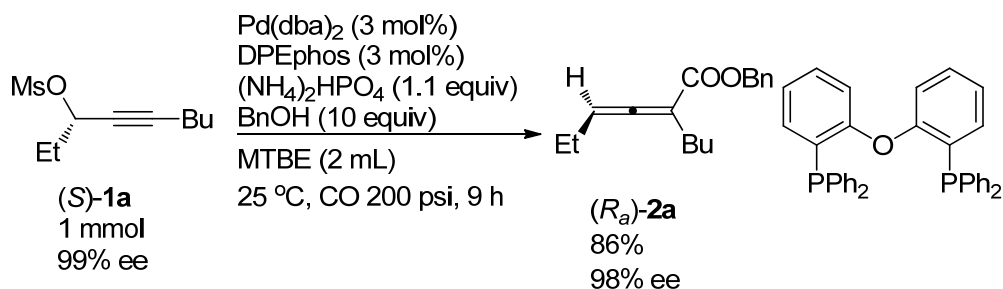

**Typical procedure 1:** To a flame-dried Schlenk tube were added Pd(dba)<sub>2</sub> (17.5 mg, 0.03 mmol) and DPEphos (16.6 mg, 0.03 mmol). Then the tube was degassed and refilled with Ar for three times to ensure the complete exclusion of air. Freshly distilled MTBE (1 mL) was subsequently added under argon. The resulting Pd(0) mixture was stirred for 1 hour at room temperature.

To a flame-dried tube filled with argon were added (*S*)-**1a** (218.2 mg, 1.0 mmol) / MTBE (0.5 mL), BnOH (1.0815 g, 10 mmol) / MTBE (0.5 mL) and (NH<sub>4</sub>)<sub>2</sub>HPO<sub>4</sub> (145.8 mg, 1.1 mmol). After the Pd(0) mixture was transferred by syringe to the tube, it was placed into the Parr reactor. The air in the reactor was replaced by CO gas three times sequentially, the Parr reactor was charged to 200 psi with CO gas. The mixture was stirred at room temperature till the reaction ended, then the gas was vented in the hood safely. The resulting mixture was diluted with Et<sub>2</sub>O (10 mL), washed with brine (10 mL), and dried over Na<sub>2</sub>SO<sub>4</sub>. After filtration and concentration under reduced pressure, the crude product was purified by flash chromatography on silica gel to afford (*R<sub>a</sub>*)-**2a** (223.3 mg, 86%) as an oil [eluent: petroleum ether (b.p. 60-90 °C)/ethyl ether = 250/1]: 98% ee (HPLC conditions: Regis (*S,S*) Whelk-O column, hexane/*i*-PrOH = 200/1, 0.5 mL/min, λ = 214 nm, *t<sub>R</sub>* (minor) = 16.1 min, *t<sub>R</sub>* (major) = 18.1 min); [α]<sub>D</sub><sup>25</sup> = -38.5 (c = 1.17, CHCl<sub>3</sub>) [96% ee, [α]<sub>D</sub><sup>24</sup> = -38.0 (c = 1.17, CHCl<sub>3</sub>)]<sup>[1]</sup>; <sup>1</sup>H NMR (300 MHz, CDCl<sub>3</sub>): δ = 7.40-7.23 (m, 5 H, Ar-H), 5.63-5.54 (m, 1 H, =CH), 5.22 (d, *J* = 12.6 Hz, 1 H, one proton from Bn), 5.14 (d, *J* = 12.9 Hz, 1 H, one proton from Bn), 2.32-2.18 (m, 2 H, CH<sub>2</sub>), 2.18-2.05 (m, 2 H, CH<sub>2</sub>), 1.50-1.27 (m, 4 H, 2 x CH<sub>2</sub>), 1.04 (t, *J* = 7.2 Hz, 3 H, CH<sub>3</sub>), 0.90 (t, *J* = 7.1 Hz, 3 H, CH<sub>3</sub>); <sup>13</sup>C NMR

(75 MHz, CDCl<sub>3</sub>):  $\delta$  = 209.8, 167.6, 136.4, 128.3, 127.8, 127.5, 101.1, 96.7, 66.1, 30.3, 28.1, 22.2, 21.3, 13.9, 13.2.

The following compounds ((*R<sub>a</sub>*)-**2b**-(*R<sub>a</sub>*)-**2l** and (*S<sub>a</sub>*)-**2m**) in Table 4 were prepared according to this **Typical Procedure 1**.

**Reaction on gram scale:**

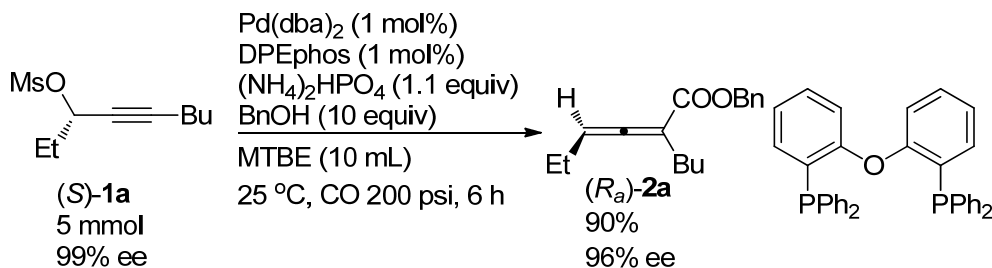

To a flame-dried Schlenk tube were added Pd(dba)<sub>2</sub> (28.8 mg, 0.05 mmol) and DPEphos (27.9 mg, 0.05 mmol). Then the tube was degassed and refilled with Ar for three times to ensure the complete exclusion of air. Freshly distilled MTBE (2 mL) was subsequently added under argon. The resulting Pd(0) mixture was stirred for 1 hour at room temperature.

To a flame-dried tube filled with argon were added (NH<sub>4</sub>)<sub>2</sub>HPO<sub>4</sub> (0.7260 g, 5.5 mmol), (*S*)-**1a** (1.1021 g, 5 mmol) / MTBE (4 mL), and BnOH (5.4088 g, 50 mmol) / MTBE (4 mL). After the Pd(0) mixture was transferred by syringe to the tube, it was placed into the Parr reactor. The air in the reactor was replaced by CO gas three times sequentially, the Parr reactor was charged to 200 psi with CO gas. The mixture was stirred at room temperature till the reaction ended, then the gas was vented in the hood safely. The resulting mixture was diluted with Et<sub>2</sub>O (20 mL), washed with brine (20 mL), and dried over Na<sub>2</sub>SO<sub>4</sub>. After filtration and concentration under reduced pressure, the crude product was purified by flash chromatography on silica gel to afford (*R<sub>a</sub>*)-**2a** (1.1750 g, 90%) as an oil [eluent: petroleum ether (b.p. 60-90 °C)/ethyl ether = 250/1]: 96% ee (HPLC conditions: Regis (*S,S*) Whelk-O column, hexane/*i*-PrOH = 200/1, 1.0 mL/min,  $\lambda$  = 214 nm,  $t_R$  (minor) = 11.3 min,  $t_R$  (major) = 13.0 min);  $[\alpha]_D^{21}$  = -37.8 ( $c$  = 1.21, CHCl<sub>3</sub>) [96% ee,  $[\alpha]_D^{24}$  = -38.0 ( $c$  = 1.17, CHCl<sub>3</sub>)]<sup>[1]</sup>; <sup>1</sup>H NMR (300 MHz, CDCl<sub>3</sub>):  $\delta$  = 7.39-7.23 (m, 5 H, Ar-H), 5.63-5.54 (m, 1 H, =CH), 5.22 (d,  $J$  = 12.6 Hz, 1 H, one proton from Bn), 5.14 (d,  $J$  = 12.6 Hz, 1 H,

one proton from Bn), 2.32-2.18 (m, 2 H, CH<sub>2</sub>), 2.18-2.06 (m, 2 H, CH<sub>2</sub>), 1.49-1.23 (m, 4 H, 2 x CH<sub>2</sub>), 1.04 (t, *J* = 7.4 Hz, 3 H, CH<sub>3</sub>), 0.90 (t, *J* = 6.9 Hz, 3 H, CH<sub>3</sub>); <sup>13</sup>C NMR (75 MHz, CDCl<sub>3</sub>): δ = 209.8, 167.6, 136.5, 128.4, 127.8, 127.5, 101.1, 96.7, 66.1, 30.3, 28.1, 22.2, 21.4, 13.9, 13.2.

## (2) Preparation of (*R<sub>a</sub>*)-benzyl 2-butyl-2,3-hexadienoate ((*R<sub>a</sub>*)-2a) (wyl-17-64)

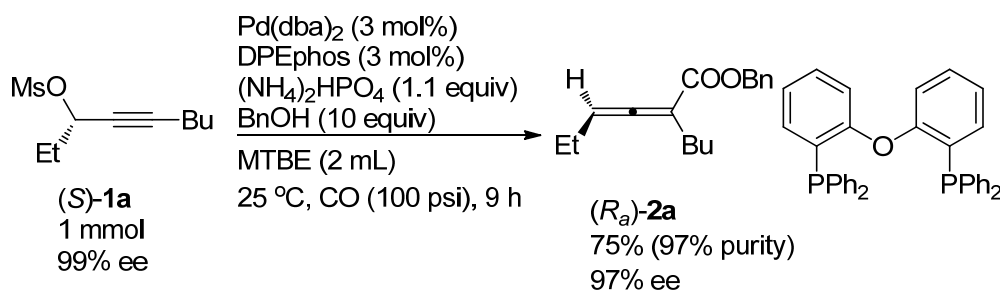

**Typical procedure 2:** To a flame-dried Schlenk tube were added Pd(dba)<sub>2</sub> (17.3 mg, 0.03 mmol) and DPEphos (16.8 mg, 0.03 mmol). Then the tube was degassed and refilled with Ar for three times to ensure the complete exclusion of air. Freshly distilled MTBE (1 mL) was subsequently added under argon. The resulting Pd(0) mixture was stirred for 1 hour at room temperature.

To a flame-dried tube filled with argon were added (NH<sub>4</sub>)<sub>2</sub>HPO<sub>4</sub> (144.9 mg, 1.1 mmol), (*S*)-**1a** (218.9 mg, 1.0 mmol) / MTBE (0.5 mL), and BnOH (1.0808 g, 10 mmol) / MTBE (0.5 mL). After the Pd(0) mixture was transferred by syringe to the tube, it was placed into the Parr reactor. The air in the reactor was replaced by CO gas three times sequentially, the Parr reactor was charged to 100 psi with CO gas. The mixture was stirred at room temperature till the reaction ended, then the gas was vented in the hood safely. The resulting mixture was diluted with Et<sub>2</sub>O (10 mL), washed with brine (10 mL), and dried over Na<sub>2</sub>SO<sub>4</sub>. After filtration and concentration under reduced pressure, the crude product was purified by flash chromatography on silica gel to afford (*R<sub>a</sub>*)-**2a** (201.3 mg, 75%, 97% purity) as an oil [eluent: petroleum ether (b.p. 60-90 °C)/ethyl ether = 250/1]: 97% ee (HPLC conditions: Regis (*S,S*) Whelk-O column, hexane/*i*-PrOH = 200/1, 1.0 mL/min, λ = 214 nm, *t<sub>R</sub>* (minor) = 10.8 min, *t<sub>R</sub>* (major) = 12.5 min); [α]<sub>D</sub><sup>19</sup> = -38.2 (*c* = 1.25, CHCl<sub>3</sub>) [96% ee, [α]<sub>D</sub><sup>24</sup> = -38.0 (*c* = 1.17, CHCl<sub>3</sub>)]<sup>[1]</sup>; <sup>1</sup>H NMR (300 MHz, CDCl<sub>3</sub>): δ = 7.40-7.25 (m, 5 H, Ar-H),

5.63-5.55 (m, 1 H, =CH), 5.22 (d,  $J = 12.9$  Hz, 1 H, one proton from Bn), 5.15 (d,  $J = 12.9$  Hz, 1 H, one proton from Bn), 2.32-2.18 (m, 2 H, CH<sub>2</sub>), 2.18-2.06 (m, 2 H, CH<sub>2</sub>), 1.48-1.28 (m, 4 H, 2 x CH<sub>2</sub>), 1.04 (t,  $J = 7.4$  Hz, 3 H, CH<sub>3</sub>), 0.90 (t,  $J = 7.2$  Hz, 3 H, CH<sub>3</sub>); <sup>13</sup>C NMR (75 MHz, CDCl<sub>3</sub>):  $\delta = 209.8, 167.5, 136.4, 128.3, 127.8, 127.5, 101.1, 96.7, 66.1, 30.2, 28.1, 22.2, 21.3, 13.8, 13.2$ .

The following compounds ((*R<sub>a</sub>*)-**2j**-(*R<sub>a</sub>*)-**2l** and (*S<sub>a</sub>*)-**2n**) in Table 4 were prepared according to this **Typical Procedure 2**.

### (3) Preparation of (*R<sub>a</sub>*)-benzyl 2-methyl-2,3-hexadienoate ((*R<sub>a</sub>*)-**2b**) (zwl-2-111)

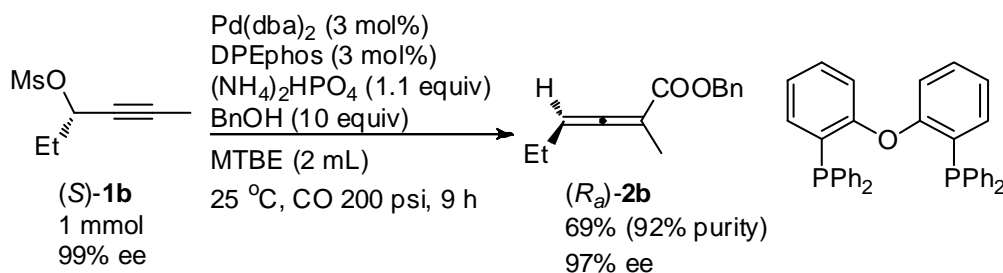

Following **Typical procedure 1**. The reaction of Pd(dba)<sub>2</sub> (17.4 mg, 0.03 mmol), DPEphos (16.9 mg, 0.03 mmol) / MTBE (1 mL), (NH<sub>4</sub>)<sub>2</sub>HPO<sub>4</sub> (145.5 mg, 1.1 mmol), (*S*)-**1b** (176.0 mg, 1 mmol) / MTBE (0.5 mL), BnOH (1.0811 g, 10 mmol) / MTBE (0.5 mL) afforded (*R<sub>a</sub>*)-**2b** (162.3 mg, 69%, 92% purity) as an oil: 97% ee (HPLC conditions: Regis (*S,S*) Whelk-O column, hexane/*i*-PrOH = 200/1, 1.0 mL/min,  $\lambda = 214$  nm,  $t_R$  (minor) = 10.6 min,  $t_R$  (major) = 12.3 min);  $[\alpha]_D^{22} = -62.4$  ( $c = 1.40$ , CHCl<sub>3</sub>) [90% ee,  $[\alpha]_D^{20} = -65.6$  ( $c = 1.17$ , CHCl<sub>3</sub>)]<sup>[1]</sup>; <sup>1</sup>H NMR (300 MHz, CDCl<sub>3</sub>):  $\delta = 7.41$ - $7.22$  (m, 5 H, Ar-H), 5.57-5.48 (m, 1 H, =CH), 5.22 (d,  $J = 12.3$  Hz, 1 H, one proton from Bn), 5.14 (d,  $J = 12.6$  Hz, 1 H, one proton from Bn), 2.18-2.05 (m, 2 H, CH<sub>2</sub> from Et), 1.89 (d,  $J = 3.0$  Hz, 3 H, CH<sub>3</sub> from Me), 1.03 (t,  $J = 7.5$  Hz, 3 H, CH<sub>3</sub> from Et); <sup>13</sup>C NMR (75 MHz, CDCl<sub>3</sub>):  $\delta = 210.1, 167.8, 136.4, 128.4, 127.8, 127.5, 96.1, 95.6, 66.2, 21.2, 15.2, 13.2$ .

### (4) Preparation of (*R<sub>a</sub>*)-benzyl 2-propyl-2,3-hexadienoate ((*R<sub>a</sub>*)-**2c**) (zwl-2-90)

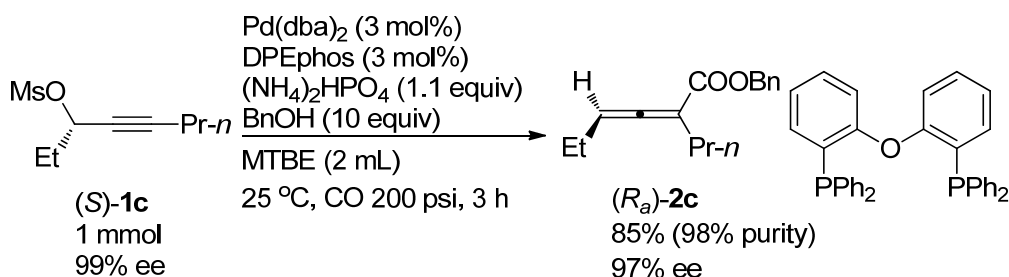

Following **Typical procedure 1**. The reaction of  $\text{Pd(dba)}_2$  (17.3 mg, 0.03 mmol), DPEphos (16.8 mg, 0.03 mmol) / MTBE (1 mL),  $(\text{NH}_4)_2\text{HPO}_4$  (145.0 mg, 1.1 mmol), **(S)-1c** (205.0 mg, 1 mmol) / MTBE (0.5 mL), BnOH (1.0800 g, 10 mmol) / MTBE (0.5 mL) afforded **(R<sub>a</sub>)-2c** (213.3 mg, 85%, 98% purity) as an oil: 97% ee (HPLC conditions: Regis (*S,S*) Whelk-O column, hexane/*i*-PrOH = 200/1, 1.0 mL/min,  $\lambda$  = 214 nm,  $t_R$  (minor) = 11.8 min,  $t_R$  (major) = 13.5 min);  $[\alpha]_D^{24} = -44.3$  ( $c$  = 1.22,  $\text{CHCl}_3$ ) [97% ee,  $[\alpha]_D^{22} = -44.2$  ( $c$  = 1.08,  $\text{CHCl}_3$ )]<sup>[1]</sup>;  $^1\text{H}$  NMR (300 MHz,  $\text{CDCl}_3$ ):  $\delta$  = 7.40-7.22 (m, 5 H, Ar-H), 5.63-5.53 (m, 1 H, =CH), 5.21 (d,  $J$  = 12.3 Hz, 1 H, one proton from Bn), 5.14 (d,  $J$  = 12.3 Hz, 1 H, one proton from Bn), 2.32-2.17 (m, 2 H,  $\text{CH}_2$ ), 2.17-2.05 (m, 2 H,  $\text{CH}_2$ ), 1.55-1.40 (m, 2 H,  $\text{CH}_2$ ), 1.04 (t,  $J$  = 7.2 Hz, 3 H,  $\text{CH}_3$ ), 0.93 (t,  $J$  = 7.4 Hz, 3 H,  $\text{CH}_3$ );  $^{13}\text{C}$  NMR (75 MHz,  $\text{CDCl}_3$ ):  $\delta$  = 209.9, 167.6, 136.4, 128.4, 127.8, 127.5, 101.0, 96.7, 66.1, 30.5, 21.3, 13.6, 13.2.

##### (5) Preparation of **(R<sub>a</sub>)-benzyl 2-*n*-hexyl-2,3-hexadienoate ((R<sub>a</sub>)-2d) (zwl-2-47)**

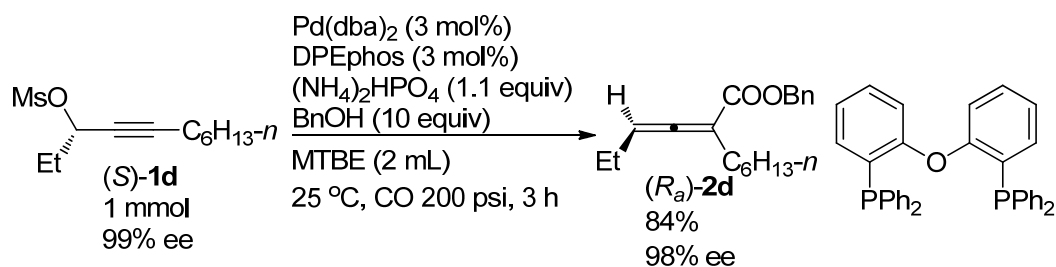

Following **Typical procedure 1**. The reaction of  $\text{Pd(dba)}_2$  (17.4 mg, 0.03 mmol), DPEphos (16.8 mg, 0.03 mmol) / MTBE (1 mL),  $(\text{NH}_4)_2\text{HPO}_4$  (145.3 mg, 1.1 mmol), **(S)-1d** (246.0 mg, 1 mmol) / MTBE (0.5 mL), BnOH (1.0814 g, 10 mmol) / MTBE (0.5 mL) afforded **(R<sub>a</sub>)-2d** (240.1 mg, 84%) as an oil: 98% ee (HPLC conditions: Regis (*S,S*) Whelk-O column, hexane/*i*-PrOH = 200/1, 0.5 mL/min,  $\lambda$  = 214 nm,  $t_R$  (minor) = 12.1 min,  $t_R$  (major) = 13.8 min);  $[\alpha]_D^{30} = -33.6$  ( $c$  = 1.48,  $\text{CHCl}_3$ ) [95% ee,  $[\alpha]_D^{24} = -33.3$  ( $c$  = 1.21,  $\text{CHCl}_3$ )]<sup>[1]</sup>;  $^1\text{H}$  NMR (300 MHz,  $\text{CDCl}_3$ ):  $\delta$  = 7.40-7.24 (m, 5



H, Ar-H), 5.63-5.54 (m, 1 H, =CH), 5.22 (d,  $J = 12.9$  Hz, 1 H, one proton from Bn), 5.15 (d,  $J = 12.6$  Hz, 1 H, one proton from Bn), 2.32-2.18 (m, 2 H, CH<sub>2</sub>), 2.18-2.06 (m, 2 H, CH<sub>2</sub>), 1.50-1.20 (m, 8 H, 4 x CH<sub>2</sub>), 1.04 (t,  $J = 7.4$  Hz, 3 H, CH<sub>3</sub>), 0.88 (t,  $J = 6.9$  Hz, 3 H, CH<sub>3</sub>); <sup>13</sup>C NMR (75 MHz, CDCl<sub>3</sub>):  $\delta = 209.8, 167.6, 136.5, 128.4, 127.8, 127.5, 101.2, 96.7, 66.1, 31.6, 28.8, 28.4, 28.1, 22.6, 21.4, 14.0, 13.3$ .

**(6) Preparation of (*R<sub>a</sub>*)-benzyl 2-*t*-butyl-2,3-hexadienoate ((*R<sub>a</sub>*)-2e) (zwl-1-176)**

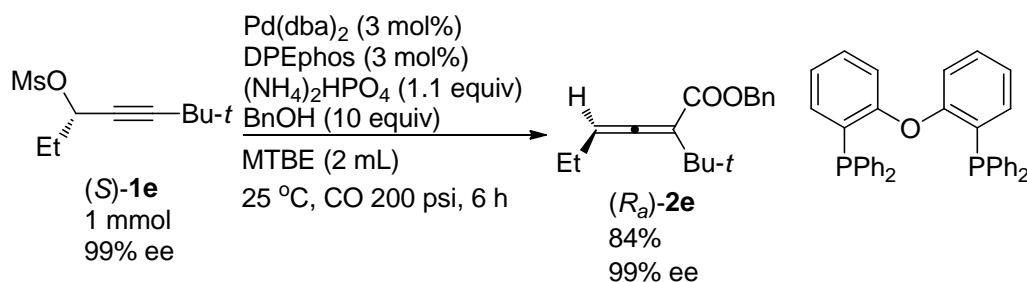

Following **Typical procedure 1**. The reaction of Pd(dba)<sub>2</sub> (17.2 mg, 0.03 mmol), DPEphos (16.6 mg, 0.03 mmol) / MTBE (1 mL), (NH<sub>4</sub>)<sub>2</sub>HPO<sub>4</sub> (145.4 mg, 1.1 mmol), (*S*)-**1e** (218.5 mg, 1 mmol) / MTBE (0.5 mL), BnOH (1.0807 g, 10 mmol) / MTBE (0.5 mL) afforded (*R<sub>a</sub>*)-**2e** (216.8 mg, 84%) as an oil: 99% ee (HPLC conditions: Regis (*S,S*) Whelk-O column, hexane/*i*-PrOH = 200:1, 0.3 mL/min,  $\lambda = 214$  nm,  $t_R$  (minor) = 20.4 min,  $t_R$  (major) = 22.2 min);  $[\alpha]_D^{22} = -43.1$  ( $c = 1.70$ , CHCl<sub>3</sub>) [97% ee,  $[\alpha]_D^{23} = -38.4$  ( $c = 1.01$ , CHCl<sub>3</sub>)]<sup>[1]</sup>; <sup>1</sup>H NMR (300 MHz, CDCl<sub>3</sub>):  $\delta = 7.37$ -7.22 (m, 5 H, Ar-H), 5.55 (t,  $J = 6.2$  Hz, 1 H, =CH), 5.19 (d,  $J = 12.9$  Hz, 1 H, one proton from Bn), 5.12 (d,  $J = 12.9$  Hz, 1 H, one proton from Bn), 2.16-2.05 (m, 2 H, CH<sub>2</sub>), 1.20 (s, 9 H, 3 x CH<sub>3</sub> from *t*-Bu), 1.03 (t,  $J = 7.5$  Hz, 3 H, CH<sub>3</sub>); <sup>13</sup>C NMR (75 MHz, CDCl<sub>3</sub>):  $\delta = 208.6, 166.5, 136.5, 128.3, 127.7, 127.3, 110.0, 96.5, 65.6, 33.0, 29.5, 21.3, 13.0$ .

**(7) Preparation of (*R<sub>a</sub>*)-benzyl 2-(3-methylbutyl)-2,3-hexadienoate ((*R<sub>a</sub>*)-2f)**

**(wyl-16-113)**

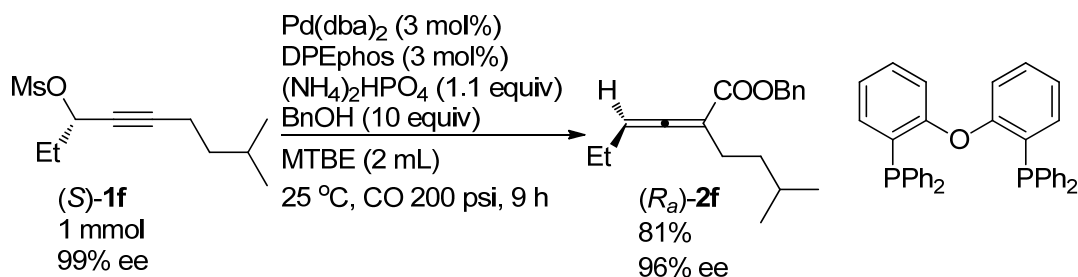

Following **Typical procedure 1**. The reaction of Pd(dba)<sub>2</sub> (17.3 mg, 0.03 mmol),

DPEphos (16.8 mg, 0.03 mmol) / MTBE (1 mL), (NH<sub>4</sub>)<sub>2</sub>HPO<sub>4</sub> (144.9 mg, 1.1 mmol), (*S*)-**1f** (232.0 mg, 1 mmol) / MTBE (0.5 mL), BnOH (1.0807 g, 10 mmol) / MTBE (0.5 mL) afforded (*R<sub>a</sub>*)-**2f** (220.4 mg, 81%) as an oil: 96% ee (HPLC conditions: Regis (*S,S*) Whelk-O column, hexane/*i*-PrOH = 300/1, 0.7 mL/min, λ = 214 nm, *t<sub>R</sub>* (minor) = 19.1 min, *t<sub>R</sub>* (major) = 22.1 min); [α]<sup>24</sup><sub>D</sub> = -34.9 (*c* = 1.24, CHCl<sub>3</sub>) [94% ee, [α]<sup>22</sup><sub>D</sub> = -33.0 (*c* = 1.01, CHCl<sub>3</sub>)]<sup>[1]</sup>; <sup>1</sup>H NMR (300 MHz, CDCl<sub>3</sub>): δ = 7.40-7.23 (m, 5 H, Ar-H), 5.63-5.55 (m, 1 H, =CH), 5.22 (d, *J* = 12.6 Hz, 1 H, one proton from Bn), 5.15 (d, *J* = 12.9 Hz, 1 H, one proton from Bn), 2.29-2.18 (m, 2 H, CH<sub>2</sub>), 2.18-2.06 (m, 2 H, CH<sub>2</sub>), 1.66-1.51 (m, 1 H, CH), 1.37-1.24 (m, 2 H, CH<sub>2</sub>), 1.04 (t, *J* = 7.4 Hz, 3 H, CH<sub>3</sub>), 0.89 (d, *J* = 6.6 Hz, 6 H, 2 x CH<sub>3</sub>); <sup>13</sup>C NMR (75 MHz, CDCl<sub>3</sub>): δ = 209.7, 167.6, 136.4, 128.3, 127.8, 127.5, 101.3, 96.8, 66.1, 37.2, 27.5, 26.4, 22.5, 21.3, 13.2.

**(8) Preparation of (*R<sub>a</sub>*)-benzyl 2-(4-chlorobutyl)-2,3-hexadienoate ((*R<sub>a</sub>*)-**2g**) (wyl-16-116)**

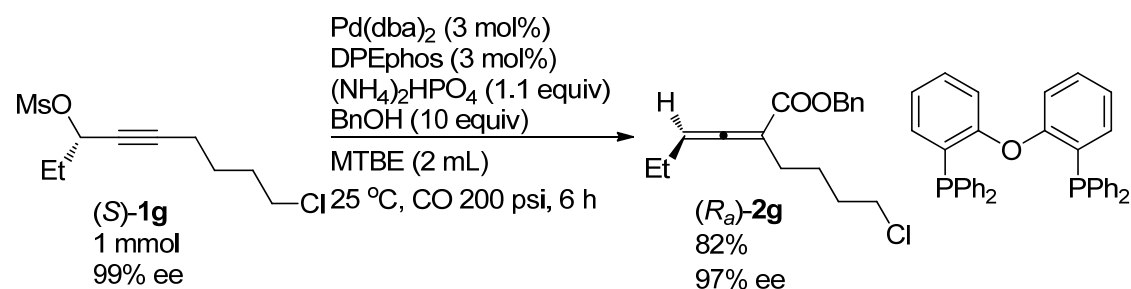

Following **Typical procedure 1**. The reaction of Pd(dba)<sub>2</sub> (17.4 mg, 0.03 mmol), DPEphos (16.7 mg, 0.03 mmol) / MTBE (1 mL), (NH<sub>4</sub>)<sub>2</sub>HPO<sub>4</sub> (145.0 mg, 1.1 mmol), (*S*)-**1g** (253.0 mg, 1 mmol) / MTBE (0.5 mL), BnOH (1.0807 g, 10 mmol) / MTBE (0.5 mL) afforded (*R<sub>a</sub>*)-**2g** (240.2 mg, 82%) as an oil: 97% ee (HPLC conditions: Regis (*S,S*) Whelk-O column, hexane/*i*-PrOH = 200/1, 1.0 mL/min, λ = 214 nm, *t<sub>R</sub>* (minor) = 16.8 min, *t<sub>R</sub>* (major) = 18.8 min); [α]<sup>27</sup><sub>D</sub> = -29.7 (*c* = 1.10, CHCl<sub>3</sub>) [95% ee, [α]<sup>22</sup><sub>D</sub> = -29.3 (*c* = 1.17, CHCl<sub>3</sub>)]<sup>[1]</sup>; <sup>1</sup>H NMR (300 MHz, CDCl<sub>3</sub>): δ = 7.40-7.23 (m, 5 H, Ar-H), 5.66-5.58 (m, 1 H, =CH), 5.22 (d, *J* = 12.6 Hz, 1 H, one proton from Bn), 5.15 (d, *J* = 12.6 Hz, 1 H, one proton from Bn), 3.53 (t, *J* = 6.8 Hz, 2 H, CH<sub>2</sub>), 2.36-2.19 (m, 2 H, CH<sub>2</sub>), 2.19-2.07 (m, 2 H, CH<sub>2</sub>), 1.90-1.74 (m, 2 H, CH<sub>2</sub>), 1.68-1.53 (m, 2 H, CH<sub>2</sub>), 1.05 (t, *J* = 7.4 Hz, 3 H, CH<sub>3</sub> from Et); <sup>13</sup>C NMR (75 MHz, CDCl<sub>3</sub>): δ

= 209.7, 167.4, 136.3, 128.4, 127.9, 127.5, 100.5, 97.2, 66.2, 44.7, 31.9, 27.6, 25.3, 21.3, 13.2.

### (9) Preparation of (*R<sub>a</sub>*)-benzyl 2-(2-phenylethyl)-2,3-hexadienoate ((*R<sub>a</sub>*)-2h)

(zwl-1-114)

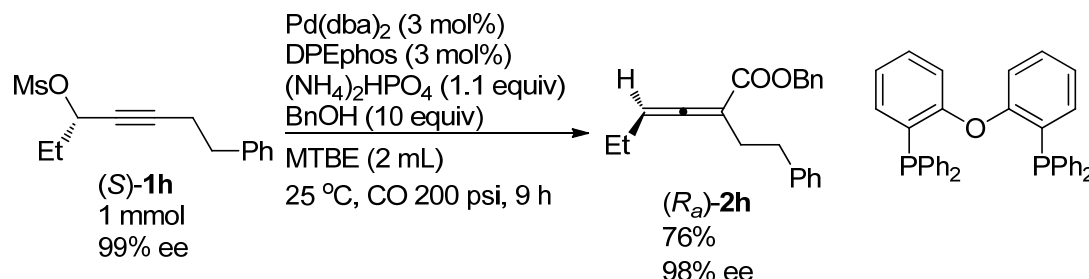

Following **Typical procedure 1**. The reaction of Pd(dba)<sub>2</sub> (17.3 mg, 0.03 mmol), DPEphos (16.6 mg, 0.03 mmol) / MTBE (1 mL), (NH<sub>4</sub>)<sub>2</sub>HPO<sub>4</sub> (145.5 mg, 1.1 mmol), (*S*)-1h (266.4 mg, 1 mmol) / MTBE (0.5 mL), BnOH (1.0813 g, 10 mmol) / MTBE (0.5 mL) afforded (*R<sub>a</sub>*)-2h (232.2 mg, 76%) as an oil: 98% ee (HPLC conditions: Regis (*S,S*) Whelk-O column, hexane/*i*-PrOH = 300/1, 1.0 mL/min, λ = 214 nm, *t<sub>R</sub>* (minor) = 26.0 min, *t<sub>R</sub>* (major) = 29.0 min); [α]<sub>D</sub><sup>26</sup> = -14.4 (*c* = 1.50, CHCl<sub>3</sub>) [92% ee, [α]<sub>D</sub><sup>24</sup> = -13.8 (*c* = 1.48, CHCl<sub>3</sub>)]<sup>[1]</sup>; <sup>1</sup>H NMR (300 MHz, CDCl<sub>3</sub>): δ = 7.45-7.10 (m, 10 H, Ar-H), 5.59-5.50 (m, 1 H, =CH), 5.22 (d, *J* = 12.9 Hz, 1 H, one proton from Bn), 5.15 (d, *J* = 12.6 Hz, 1 H, one proton from Bn), 2.83-2.68 (m, 2 H, CH<sub>2</sub>), 2.68-2.47 (m, 2 H, CH<sub>2</sub>), 2.10-1.96 (m, 2 H, CH<sub>2</sub>), 0.96 (t, *J* = 7.4 Hz, 3 H, CH<sub>3</sub>); <sup>13</sup>C NMR (75 MHz, CDCl<sub>3</sub>): δ = 209.9, 167.2, 141.4, 136.3, 128.4, 128.3, 128.2, 127.8, 127.5, 125.8, 100.3, 97.0, 66.1, 34.3, 30.2, 21.2, 13.1.

### (10) Preparation of (*R<sub>a</sub>*)-benzyl 2-(2-propylenyl)-2,3-hexadienoate ((*R<sub>a</sub>*)-2i)

(zwl-2-142)

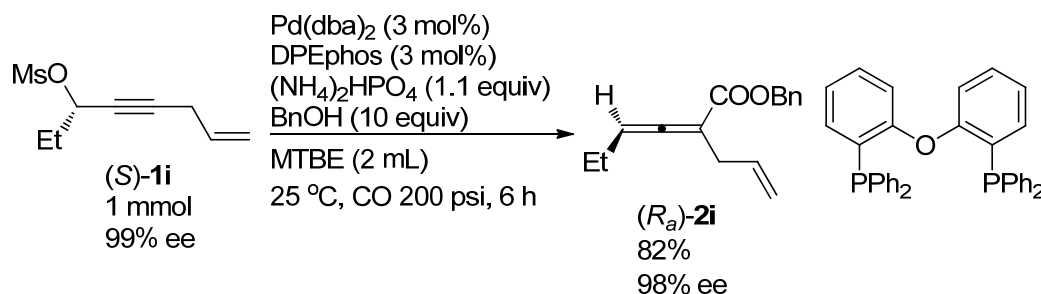

Following **Typical procedure 1**. The reaction of Pd(dba)<sub>2</sub> (17.3 mg, 0.03 mmol), DPEphos (16.8 mg, 0.03 mmol) / MTBE (1 mL), (NH<sub>4</sub>)<sub>2</sub>HPO<sub>4</sub> (145.0 mg, 1.1 mmol),

(*S*)-**1i** (202.0 mg, 1 mmol) / MTBE (0.5 mL), BnOH (1.0809 g, 10 mmol) / MTBE (0.5 mL) afforded (*R<sub>a</sub>*)-**2i** (198.7 mg, 82%) as an oil: 98% ee (HPLC conditions: Regis (*S,S*) Whelk-O column, hexane/*i*-PrOH = 200/1, 1.0 mL/min,  $\lambda$  = 214 nm,  $t_R$  (minor) = 12.9 min,  $t_R$  (major) = 15.0 min);  $[\alpha]_D^{21}$  = -41.7 ( $c$  = 1.57, CHCl<sub>3</sub>) [91% ee,  $[\alpha]_D^{26}$  = -38.0 ( $c$  = 1.21, CHCl<sub>3</sub>)]<sup>[1]</sup>; <sup>1</sup>H NMR (300 MHz, CDCl<sub>3</sub>):  $\delta$  = 7.40-7.25 (m, 5 H, Ar-H), 5.91-5.75 (m, 1 H, CH=), 5.67-5.59 (m, 1 H, =CH), 5.22 (d,  $J$  = 12.9 Hz, 1 H, one proton from Bn), 5.15 (d,  $J$  = 12.9 Hz, 1 H, one proton from Bn), 5.13-4.99 (m, 2 H, =CH<sub>2</sub>), 3.09-2.93 (m, 2 H, CH<sub>2</sub>), 2.18-2.06 (m, 2 H, CH<sub>2</sub>), 1.03 (t,  $J$  = 7.4 Hz, 3 H, CH<sub>3</sub>); <sup>13</sup>C NMR (75 MHz, CDCl<sub>3</sub>):  $\delta$  = 210.1, 167.0, 136.3, 135.2, 128.3, 127.8, 127.5, 116.0, 99.6, 97.1, 66.2, 33.1, 21.2, 13.1.

**(11) Preparation of (*R<sub>a</sub>*)-benzyl 2-*n*-heptyl-2,3-pentadienoate ((*R<sub>a</sub>*)-**2j**) (zwl-1-129)**

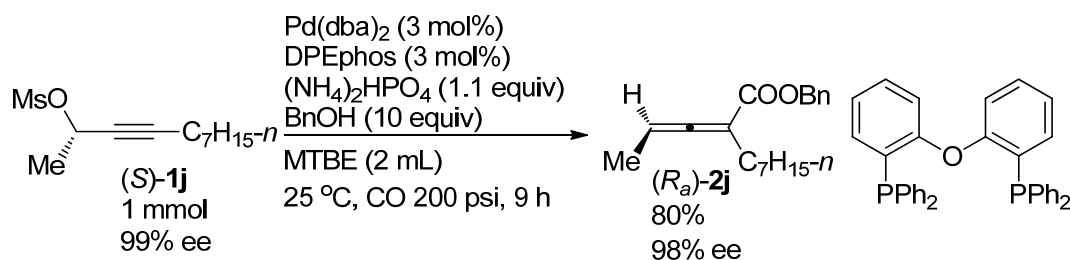

Following **Typical procedure 1**. The reaction of Pd(dba)<sub>2</sub> (17.3 mg, 0.03 mmol), DPEphos (17.0 mg, 0.03 mmol) / MTBE (1 mL), (NH<sub>4</sub>)<sub>2</sub>HPO<sub>4</sub> (145.5 mg, 1.1 mmol), (*S*)-**1j** (246.6 mg, 1 mmol) / MTBE (0.5 mL), BnOH (1.0820 g, 10 mmol) / MTBE (0.5 mL) afforded (*R<sub>a</sub>*)-**2j** (229.3 mg, 80%) as an oil: 98% ee (HPLC conditions: Regis (*S,S*) Whelk-O column, hexane/*i*-PrOH = 200/1, 0.5 mL/min,  $\lambda$  = 214 nm,  $t_R$  (minor) = 14.2 min,  $t_R$  (major) = 17.0 min);  $[\alpha]_D^{26}$  = -29.8 ( $c$  = 1.24, CHCl<sub>3</sub>) [93% ee,  $[\alpha]_D^{23}$  = -27.0 ( $c$  = 1.15, CHCl<sub>3</sub>)]<sup>[1]</sup>; <sup>1</sup>H NMR (300 MHz, CDCl<sub>3</sub>):  $\delta$  = 7.43-7.23 (m, 5 H, Ar-H), 5.56-5.44 (m, 1 H, =CH), 5.18 (s, 2 H, CH<sub>2</sub> from Bn), 2.32-2.13 (m, 2 H, CH<sub>2</sub>), 1.76 (d,  $J$  = 7.2 Hz, 3 H, CH<sub>3</sub>), 1.52-1.16 (m, 10 H, 5 x CH<sub>2</sub>), 0.88 (t,  $J$  = 6.3 Hz, 3 H, CH<sub>3</sub>); <sup>13</sup>C NMR (75 MHz, CDCl<sub>3</sub>):  $\delta$  = 210.7, 167.5, 136.4, 128.4, 127.8, 127.6, 100.0, 89.7, 66.1, 31.8, 29.1, 29.0, 28.4, 28.0, 22.6, 14.1, 13.3.

**(12) Preparation of (*R<sub>a</sub>*)-benzyl 2-*n*-heptyl-2,3-pentadienoate ((*R<sub>a</sub>*)-**2j**) (wyl-17-62)**

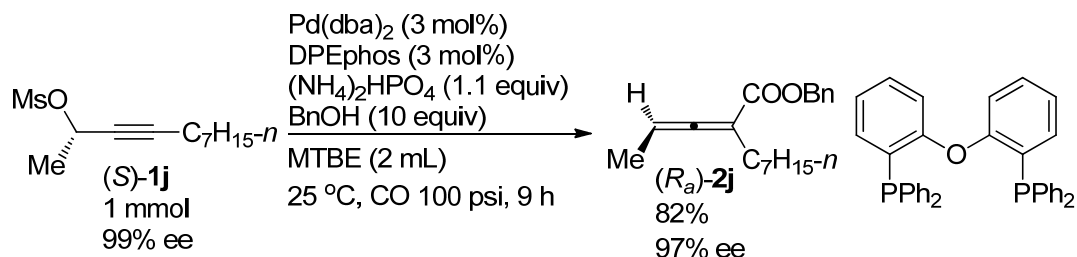

Following **Typical procedure 2**. The reaction of  $\text{Pd(dba)}_2$  (17.3 mg, 0.03 mmol), DPEphos (16.7 mg, 0.03 mmol) / MTBE (1 mL),  $(\text{NH}_4)_2\text{HPO}_4$  (145.5 mg, 1.1 mmol),  $(S)\text{-1j}$  (246.9 mg, 1 mmol) / MTBE (0.5 mL), BnOH (1.0807 g, 10 mmol) / MTBE (0.5 mL) afforded  $(R_a)\text{-2j}$  (234.8 mg, 82%) as an oil: 97% ee (HPLC conditions: Regis (*S,S*) Whelk-O column, hexane/*i*-PrOH = 200/1, 1.0 mL/min,  $\lambda$  = 214 nm,  $t_R$  (minor) = 10.2 min,  $t_R$  (major) = 12.2 min);  $[\alpha]_D^{19} = -29.5$  ( $c$  = 0.97,  $\text{CHCl}_3$ ) [93% ee,  $[\alpha]_D^{23} = -27.0$  ( $c$  = 1.15,  $\text{CHCl}_3$ )]<sup>[1]</sup>;  $^1\text{H}$  NMR (300 MHz,  $\text{CDCl}_3$ ):  $\delta$  = 7.40-7.25 (m, 5 H, Ar-H), 5.55-5.45 (m, 1 H, =CH), 5.18 (s, 2 H,  $\text{CH}_2$  from Bn), 2.32-2.14 (m, 2 H,  $\text{CH}_2$ ), 1.76 (d,  $J$  = 6.9 Hz, 3 H,  $\text{CH}_3$ ), 1.50-1.15 (m, 10 H, 5 x  $\text{CH}_2$ ), 0.88 (t,  $J$  = 6.8 Hz, 3 H,  $\text{CH}_3$ );  $^{13}\text{C}$  NMR (100 MHz,  $\text{CDCl}_3$ ):  $\delta$  = 210.7, 167.6, 136.4, 128.4, 127.8, 127.6, 99.9, 89.7, 66.1, 31.8, 29.1, 29.0, 28.4, 28.0, 22.6, 14.1, 13.3.

### (13) Preparation of $(R_a)$ -benzyl 2-butyl-2,3-undecadienoate ( $(R_a)\text{-2k}$ ) (zwl-2-95)

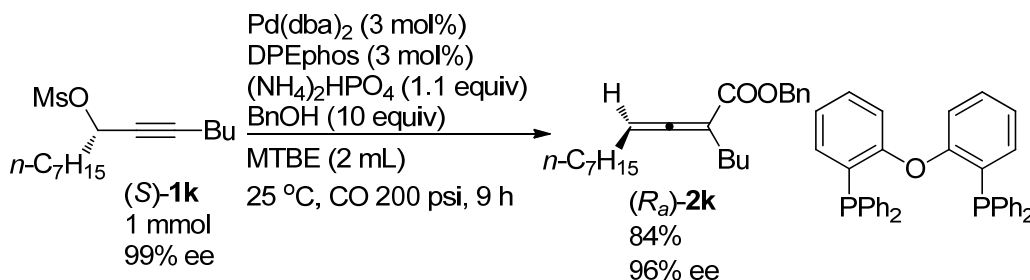

Following **Typical procedure 1**. The reaction of  $\text{Pd(dba)}_2$  (17.3 mg, 0.03 mmol), DPEphos (16.8 mg, 0.03 mmol) / MTBE (1 mL),  $(\text{NH}_4)_2\text{HPO}_4$  (145.0 mg, 1.1 mmol),  $(S)\text{-1k}$  (288.6 mg, 1 mmol) / MTBE (0.5 mL), BnOH (1.0809 g, 10 mmol) / MTBE (0.5 mL) afforded  $(R_a)\text{-2k}$  (276.1 mg, 84%) as an oil: 96% ee (HPLC conditions: Regis (*S,S*) Whelk-O column, hexane/*i*-PrOH = 200/1, 1.0 mL/min,  $\lambda$  = 214 nm,  $t_R$  (minor) = 10.3 min,  $t_R$  (major) = 11.9 min);  $[\alpha]_D^{21} = -43.3$  ( $c$  = 1.06,  $\text{CHCl}_3$ ) [94% ee,  $[\alpha]_D^{24} = -42.6$  ( $c$  = 1.32,  $\text{CHCl}_3$ )]<sup>[1]</sup>;  $^1\text{H}$  NMR (300 MHz,  $\text{CDCl}_3$ ):  $\delta$  = 7.40-7.21 (m, 5 H, Ar-H), 5.58-5.47 (m, 1 H, =CH), 5.21 (d,  $J$  = 12.9 Hz, 1 H, one proton from Bn),

5.15 (d,  $J = 12.9$  Hz, 1 H, one proton from Bn), 2.33-2.15 (m, 2 H, CH<sub>2</sub>), 2.10 (q,  $J = 7.1$  Hz, 2 H, CH<sub>2</sub>), 1.51-1.12 (m, 14 H, 7 x CH<sub>2</sub>), 0.90 (t,  $J = 7.4$  Hz, 3 H, CH<sub>3</sub>), 0.88 (t,  $J = 7.4$  Hz, 3 H, CH<sub>3</sub>); <sup>13</sup>C NMR (75 MHz, CDCl<sub>3</sub>):  $\delta = 210.0, 167.6, 136.4, 128.4, 127.8, 127.6, 100.4, 95.1, 66.1, 31.7, 30.3, 29.05, 28.97, 28.2, 28.1, 22.6, 22.2, 14.1, 13.9$ .

**(14) Preparation of (*R<sub>a</sub>*)-benzyl 2-butyl-2,3-undecadienoate ((*R<sub>a</sub>*)-2k) (wyl-17-61)**

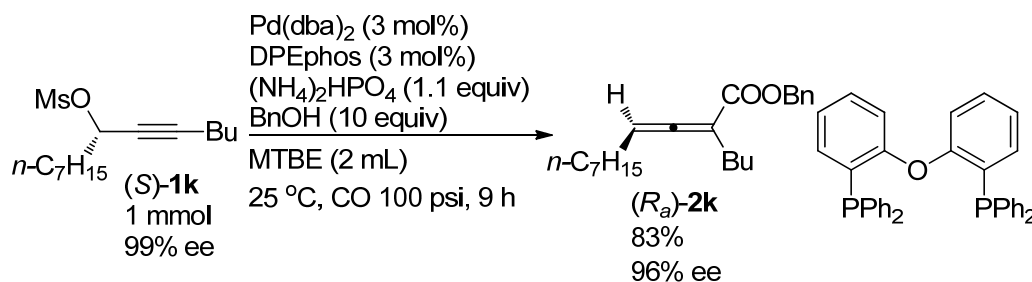

Following **Typical procedure 2**. The reaction of Pd(dba)<sub>2</sub> (17.4 mg, 0.03 mmol), DPEphos (16.6 mg, 0.03 mmol) / MTBE (1 mL), (NH<sub>4</sub>)<sub>2</sub>HPO<sub>4</sub> (145.0 mg, 1.1 mmol), (*S*)-**1k** (288.9 mg, 1 mmol) / MTBE (0.5 mL), BnOH (1.0811 g, 10 mmol) / MTBE (0.5 mL) afforded (*R<sub>a</sub>*)-**2k** (272.5 mg, 83%) as an oil: 96% ee (HPLC conditions: Regis (*S,S*) Whelk-O column, hexane/*i*-PrOH = 200/1, 1.0 mL/min,  $\lambda = 214$  nm,  $t_R$  (minor) = 9.3 min,  $t_R$  (major) = 11.1 min);  $[\alpha]_D^{21} = -43.3$  ( $c = 1.03$ , CHCl<sub>3</sub>) [94% ee,  $[\alpha]_D^{24} = -42.6$  ( $c = 1.32$ , CHCl<sub>3</sub>)]<sup>[1]</sup>; <sup>1</sup>H NMR (300 MHz, CDCl<sub>3</sub>):  $\delta = 7.40$ -7.24 (m, 5 H, Ar-H), 5.56-5.47 (m, 1 H, =CH), 5.21 (d,  $J = 12.9$  Hz, 1 H, one proton from Bn), 5.15 (d,  $J = 13.2$  Hz, 1 H, one proton from Bn), 2.30-2.15 (m, 2 H, CH<sub>2</sub>), 2.10 (q,  $J = 7.2$  Hz, 2 H, CH<sub>2</sub>), 1.49-1.17 (m, 14 H, 7 x CH<sub>2</sub>), 0.90 (t,  $J = 7.2$  Hz, 3 H, CH<sub>3</sub>), 0.88 (t,  $J = 7.4$  Hz, 3 H, CH<sub>3</sub>); <sup>13</sup>C NMR (75 MHz, CDCl<sub>3</sub>):  $\delta = 210.0, 167.6, 136.4, 128.3, 127.8, 127.6, 100.4, 95.1, 66.1, 31.7, 30.3, 29.04, 28.96, 28.2, 28.1, 22.6, 22.2, 14.1, 13.9$ .

**(15) Preparation of (*R<sub>a</sub>*)-benzyl 2-butyl-6-methyl-2,3-heptadienoate ((*R<sub>a</sub>*)-2l) (wyl-16-154)**

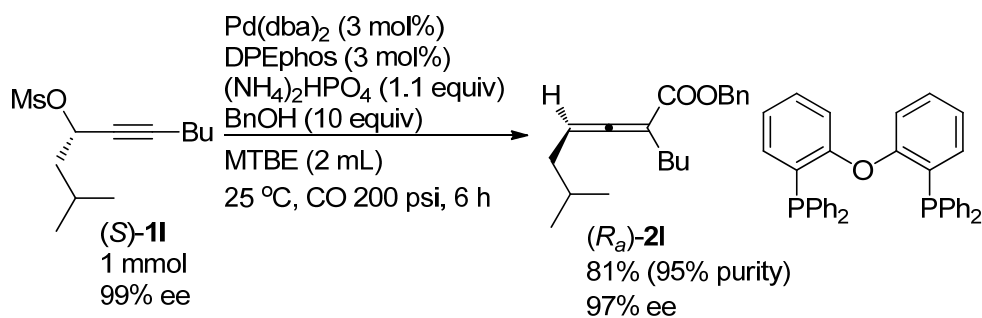

Following **Typical procedure 1**. The reaction of  $\text{Pd(dba)}_2$  (17.4 mg, 0.03 mmol),  $\text{DPEphos}$  (16.7 mg, 0.03 mmol) /  $\text{MTBE}$  (1 mL),  $(\text{NH}_4)_2\text{HPO}_4$  (145.6 mg, 1.1 mmol), **(S)-1I** (246.6 mg, 1 mmol) /  $\text{MTBE}$  (0.5 mL),  $\text{BnOH}$  (1.0817 g, 10 mmol) /  $\text{MTBE}$  (0.5 mL) afforded **(R<sub>a</sub>)-2I** (243.7 mg, 81%, 95% purity) as an oil: 97% ee (HPLC conditions: Regis (*S,S*) Whelk-O column, hexane/*i*-PrOH = 400/1, 0.5 mL/min,  $\lambda$  = 214 nm,  $t_R$  (minor) = 14.9 min,  $t_R$  (major) = 16.9 min);  $[\alpha]_D^{22} = -42.2$  ( $c$  = 1.75,  $\text{CHCl}_3$ ) [97% ee,  $[\alpha]_D^{24} = -42.5$  ( $c$  = 1.13,  $\text{CHCl}_3$ )]<sup>[1]</sup>;  $^1\text{H}$  NMR (300 MHz,  $\text{CDCl}_3$ ):  $\delta$  = 7.41-7.21 (m, 5 H, Ar-H), 5.51-5.41 (m, 1 H, =CH), 5.19 (d,  $J$  = 12.3 Hz, 1 H, one proton from Bn), 5.13 (d,  $J$  = 12.6 Hz, 1 H, one proton from Bn), 2.30-2.18 (m, 2 H,  $\text{CH}_2$ ), 1.99 (t,  $J$  = 7.2 Hz, 2 H,  $\text{CH}_2$ ), 1.78-1.60 (m, 1 H, CH), 1.50-1.25 (m, 4 H, 2 x  $\text{CH}_2$ ), 0.97-0.77 (m, 9 H, 3 x  $\text{CH}_3$ );  $^{13}\text{C}$  NMR (75 MHz,  $\text{CDCl}_3$ ):  $\delta$  = 210.3, 167.6, 136.3, 128.3, 127.8, 99.7, 93.5, 66.2, 37.4, 30.2, 28.4, 28.2, 22.14, 22.09, 13.8.

**(16) Preparation of (*R<sub>a</sub>*)-benzyl 2-butyl-6-methyl-2,3-heptadienoate ((*R<sub>a</sub>*)-2I)**  
**(wyl-17-60)**

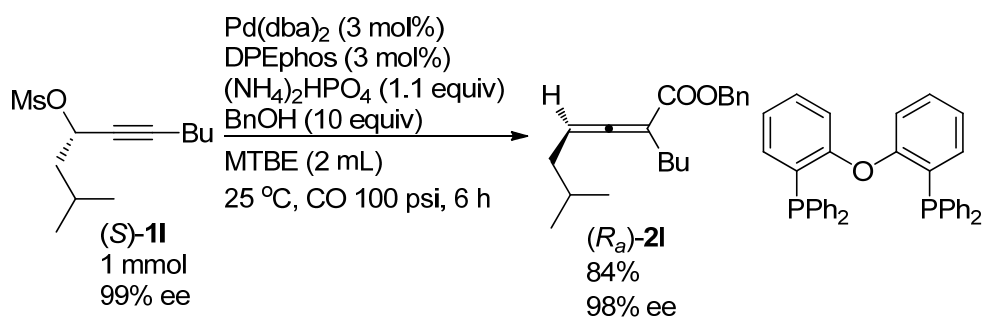

Following **Typical procedure 2**. The reaction of  $\text{Pd(dba)}_2$  (17.2 mg, 0.03 mmol),  $\text{DPEphos}$  (16.6 mg, 0.03 mmol) /  $\text{MTBE}$  (1 mL),  $(\text{NH}_4)_2\text{HPO}_4$  (146.0 mg, 1.1 mmol), **(S)-1I** (247.0 mg, 1 mmol) /  $\text{MTBE}$  (0.5 mL),  $\text{BnOH}$  (1.0820 g, 10 mmol) /  $\text{MTBE}$  (0.5 mL) afforded **(R<sub>a</sub>)-2I** (240.3 mg, 84%) as an oil: 98% ee (HPLC conditions: Regis (*S,S*) Whelk-O column, hexane/*i*-PrOH = 400/1, 1.0 mL/min,  $\lambda$  = 214 nm,  $t_R$

(minor) = 9.4 min,  $t_R$  (major) = 10.7 min);  $[\alpha]^{19}_D = -42.2$  ( $c = 1.32$ ,  $\text{CHCl}_3$ ) [97% ee,  $[\alpha]^{24}_D = -42.5$  ( $c = 1.13$ ,  $\text{CHCl}_3$ )]<sup>[1]</sup>;  $^1\text{H}$  NMR (300 MHz,  $\text{CDCl}_3$ ):  $\delta = 7.40$ -7.24 (m, 5 H, Ar-H), 5.51-5.41 (m, 1 H, =CH), 5.20 (d,  $J = 12.3$  Hz, 1 H, one proton from Bn), 5.14 (d,  $J = 12.6$  Hz, 1 H, one proton from Bn), 2.30-2.15 (m, 2 H,  $\text{CH}_2$ ), 2.00 (t,  $J = 7.2$  Hz, 2 H,  $\text{CH}_2$ ), 1.77-1.61 (m, 1 H, CH), 1.50-1.27 (m, 4 H, 2 x  $\text{CH}_2$ ), 0.97-0.82 (m, 9 H, 3 x  $\text{CH}_3$ );  $^{13}\text{C}$  NMR (75 MHz,  $\text{CDCl}_3$ ):  $\delta = 210.3$ , 167.6, 136.3, 128.3, 127.8, 99.7, 93.5, 66.2, 37.4, 30.2, 28.4, 28.2, 22.2, 22.1, 13.9.

### (17) Preparation of (*S<sub>a</sub>*)-benzyl 2-pentyl-5-methyl-2,3-hexadienoate ((*S<sub>a</sub>*)-2m)

(zwl-1-158)

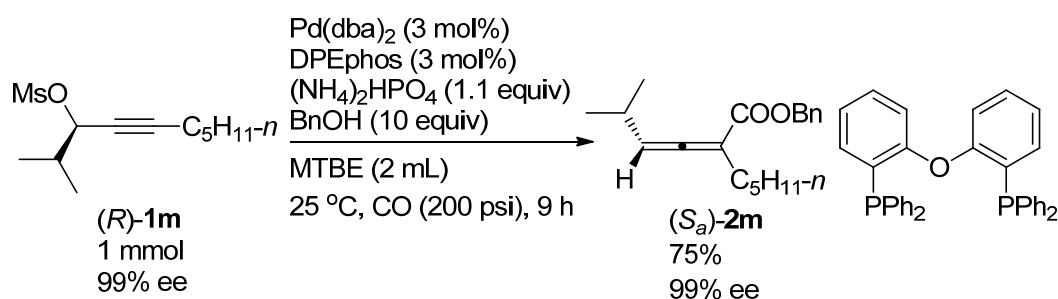

Following **Typical procedure 1**. The reaction of  $\text{Pd}(\text{dba})_2$  (17.3 mg, 0.03 mmol), DPEphos (16.8 mg, 0.03 mmol) / MTBE (1 mL),  $(\text{NH}_4)_2\text{HPO}_4$  (145.5 mg, 1.1 mmol), (*R*)-**1m** (246.5 mg, 1 mmol) / MTBE (0.5 mL), BnOH (1.0808 g, 10 mmol) / MTBE (0.5 mL) afforded (*S<sub>a</sub>*)-**2m** (214.9 mg, 75%) as an oil: 99% ee (HPLC conditions: Regis (*S, S*) Whelk-O column, hexane/*i*-PrOH = 200/1, 0.5 mL/min,  $\lambda = 214$  nm,  $t_R$  (minor) = 19.9 min,  $t_R$  (major) = 21.9 min);  $[\alpha]^{21}_D = -39.3$  ( $c = 1.22$ ,  $\text{CHCl}_3$ );  $^1\text{H}$  NMR (300 MHz,  $\text{CDCl}_3$ ):  $\delta = 7.40$ -7.22 (m, 5 H, Ar-H), 5.58-5.50 (m, 1 H, =CH), 5.23 (d,  $J = 12.9$  Hz, 1 H, one proton from Bn), 5.12 (d,  $J = 13.2$  Hz, 1 H, one proton from Bn), 2.52-2.34 (m, 1 H, CH), 2.33-2.15 (m, 2 H,  $\text{CH}_2$ ), 1.52-1.23 (m, 6 H, 3 x  $\text{CH}_2$ ), 1.05 (d,  $J = 6.9$  Hz, 6 H, 2 x  $\text{CH}_3$ ), 0.88 (t,  $J = 6.9$  Hz, 3 H,  $\text{CH}_3$ );  $^{13}\text{C}$  NMR (75 MHz,  $\text{CDCl}_3$ ):  $\delta = 208.8$ , 167.5, 136.4, 128.3, 127.8, 127.5, 102.2, 101.6, 66.1, 31.3, 28.3, 28.1, 27.8, 22.4, 22.34, 22.31, 14.0; MS (ESI  $m/z$ ): 341 ( $\text{M}+\text{Na}+\text{MeOH}$ )<sup>+</sup>, 325 ( $\text{M}+\text{K}$ )<sup>+</sup>, 309 ( $\text{M}+\text{Na}$ )<sup>+</sup>, 287 ( $\text{M}+\text{H}$ )<sup>+</sup>; IR (neat):  $\nu = 2967$ , 1956, 1711, 1253, 1193, 1121, 1057  $\text{cm}^{-1}$ ; HRMS calcd. for  $\text{C}_{19}\text{H}_{26}\text{O}_2$  [ $\text{M}^+$ ]: 286.1933, found: 286.1935.

### (18) Preparation of (*R<sub>a</sub>*)-benzyl 2-butyl-2,3-octadienoate (wyl-16-65)



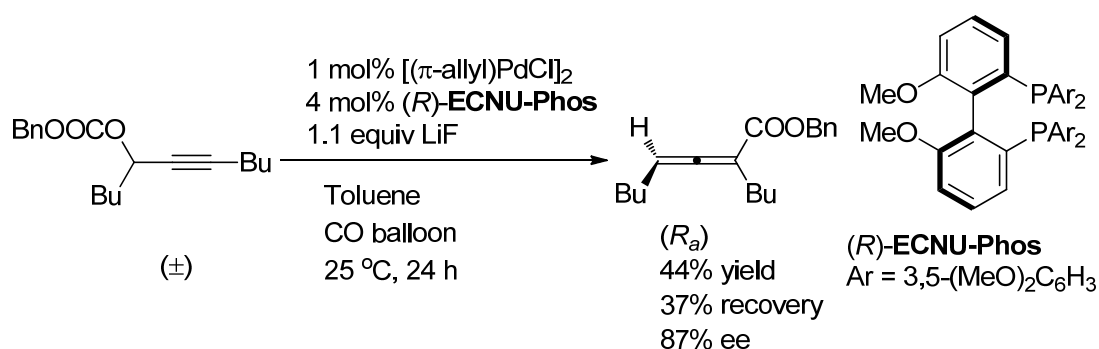

To a flame-dried Schlenk bottle (50 mL) were added  $[(\pi\text{-allyl})\text{PdCl}]_2$  (3.8 mg, 0.01 mmol) and **(*R*)-ECNU-Phos** (33.3 mg, 0.04 mmol). After addition of each of chemical, the bottle was degassed and refilled with Ar for three times to ensure the complete exclusion of air. Then freshly distilled toluene (2 mL) was added under argon. The resulting mixture was stirred for 1 hour at room temperature, which was followed by the addition of anhydrous LiF (28.5 mg, 1.1 mmol) (kept in a glove box) and ( $\pm$ )-**1a** (302.6 mg, 1.0 mmol)/toluene (3 mL) sequentially. The mixture was then frozen with a liquid nitrogen bath, degassed to remove the argon inside completely, and refilled with CO by a balloon of CO (about 1 L) for three times. Then the resulting mixture was stirred at 25 °C for 24 h. After that, the resulting mixture was diluted with 20 mL of Et<sub>2</sub>O, washed with brine (20 mL), and dried over anhydrous Na<sub>2</sub>SO<sub>4</sub>. The resulting mixture was filtered through a short pad of silica gel (1.5 cm) eluted with Et<sub>2</sub>O (20 mL), and concentrated. The residue was purified by chromatography on silica gel to afford (*R<sub>a</sub>*)-benzyl 2-butyl-2,3-octadienoate (126.8 mg, 44%; 37% recovery determined by <sup>1</sup>H NMR spectrum using 1,3,5-trimethylbenzene as internal standard) as an oil [eluent: petroleum ether (b.p. 60-90 °C)/ethyl ether = 250/1]: 87% ee (Regis (*S,S*) Whelk-O column, hexane/*i*-PrOH = 200/1, 1.0 mL/min,  $\lambda$  = 214 nm,  $t_R$ (minor) = 12.5 min,  $t_R$ (major) = 14.6 min);  $[\alpha]_D^{30}$  = -21.4 ( $c$  = 1.10, CHCl<sub>3</sub>); <sup>1</sup>H NMR (300 MHz, CDCl<sub>3</sub>):  $\delta$  = 7.42-7.23 (m, 5 H, Ar-H), 5.56-5.46 (m, 1 H, =CH), 5.21 (d,  $J$  = 12.6 Hz, 1 H, one proton from Bn), 5.14 (d,  $J$  = 12.6 Hz, 1 H, one proton from Bn), 2.34-2.15 (m, 2 H, CH<sub>2</sub>), 2.10 (q,  $J$  = 7.0 Hz, 2 H, CH<sub>2</sub>), 1.50-1.24 (m, 8 H, 4 x CH<sub>2</sub>), 0.90 (t,  $J$  = 7.1 Hz, 3 H, CH<sub>3</sub>), 0.87 (t,  $J$  = 7.2 Hz, 3 H, CH<sub>3</sub>); <sup>13</sup>C NMR (75 MHz, CDCl<sub>3</sub>):  $\delta$  = 210.0, 167.6, 136.4, 128.3, 127.8, 127.6, 100.4, 95.0, 66.1, 31.0, 30.2, 28.1, 27.7, 22.2, 22.0, 13.9, 13.8; MS (ESI  $m/z$ ): 341

$(M+Na+MeOH)^+$ , 309  $(M+Na)^+$ ; IR (neat):  $\nu = 2970, 2925, 2903, 1957, 1711, 1262, 1054\text{ cm}^{-1}$ ; HRMS calcd. for  $C_{19}H_{26}O_2$   $[M^+]$ : 286.1933, found: 286.1932.

Reference:

1. Wang, Y.; Ma, S. *Adv. Synth. Catal.* 2013, 355, 741.

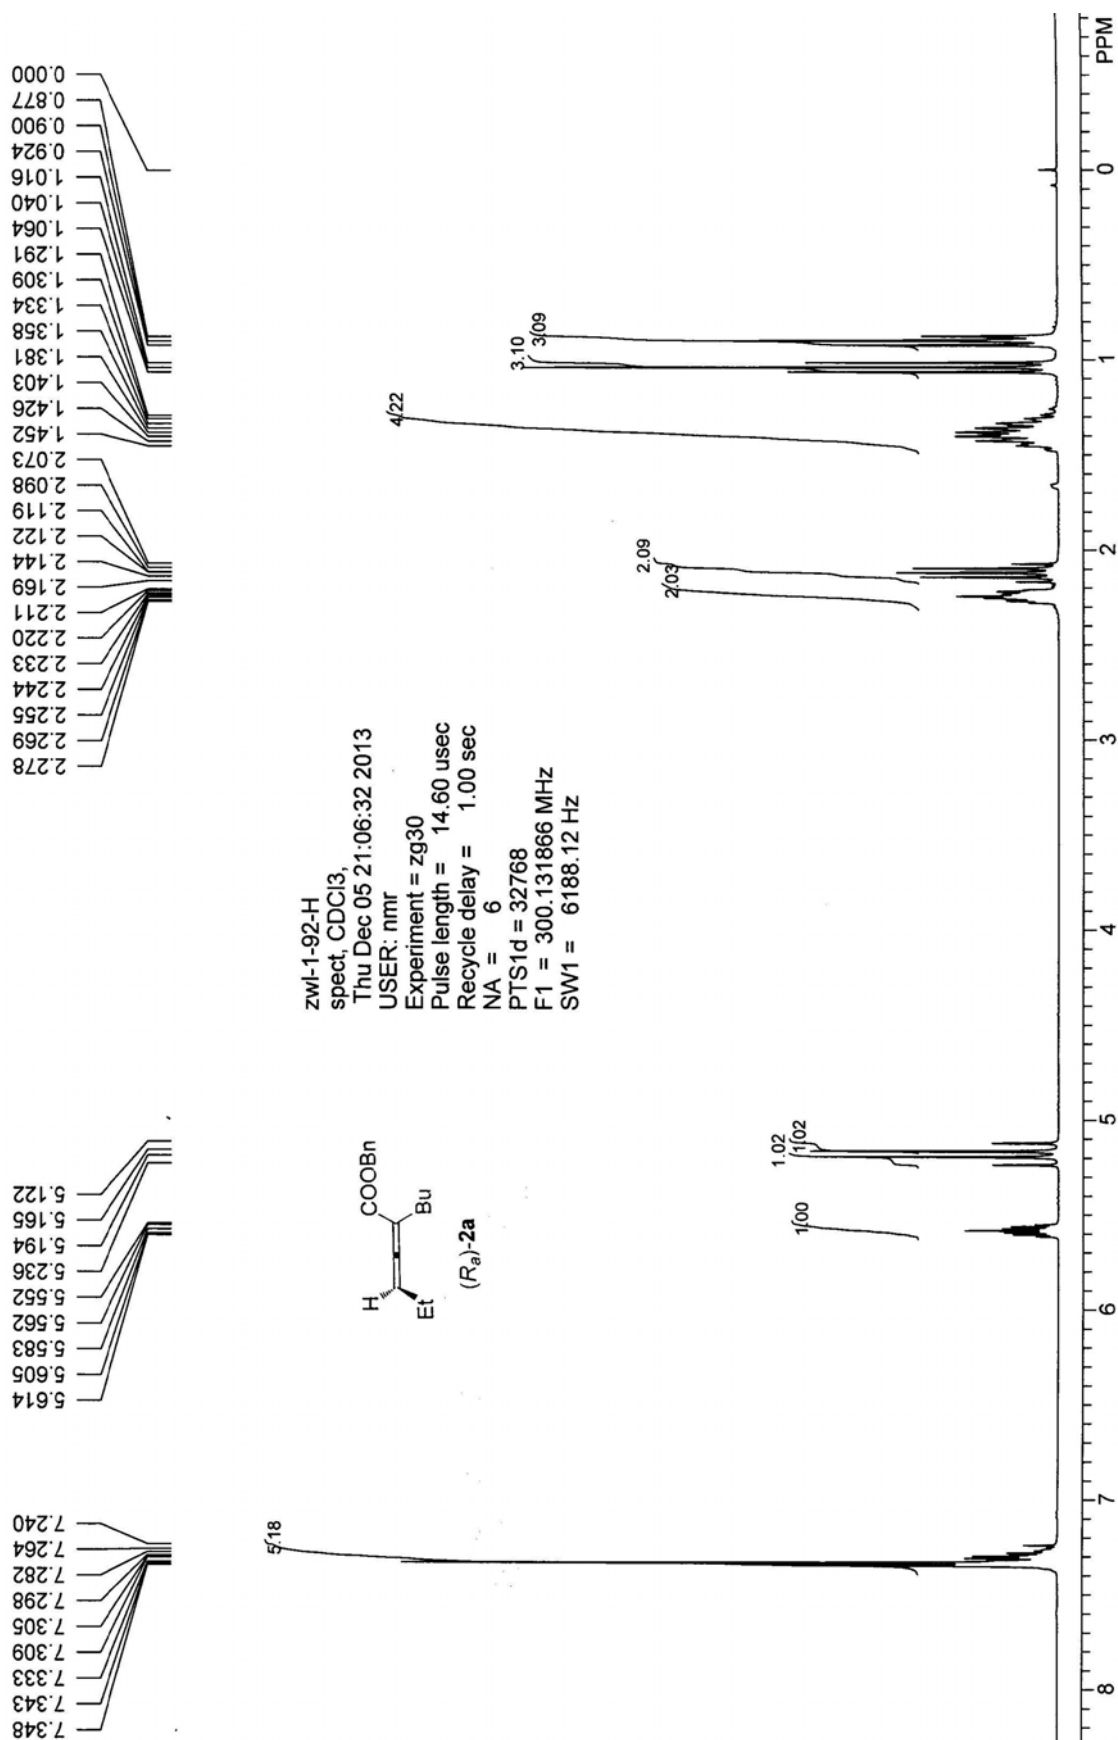

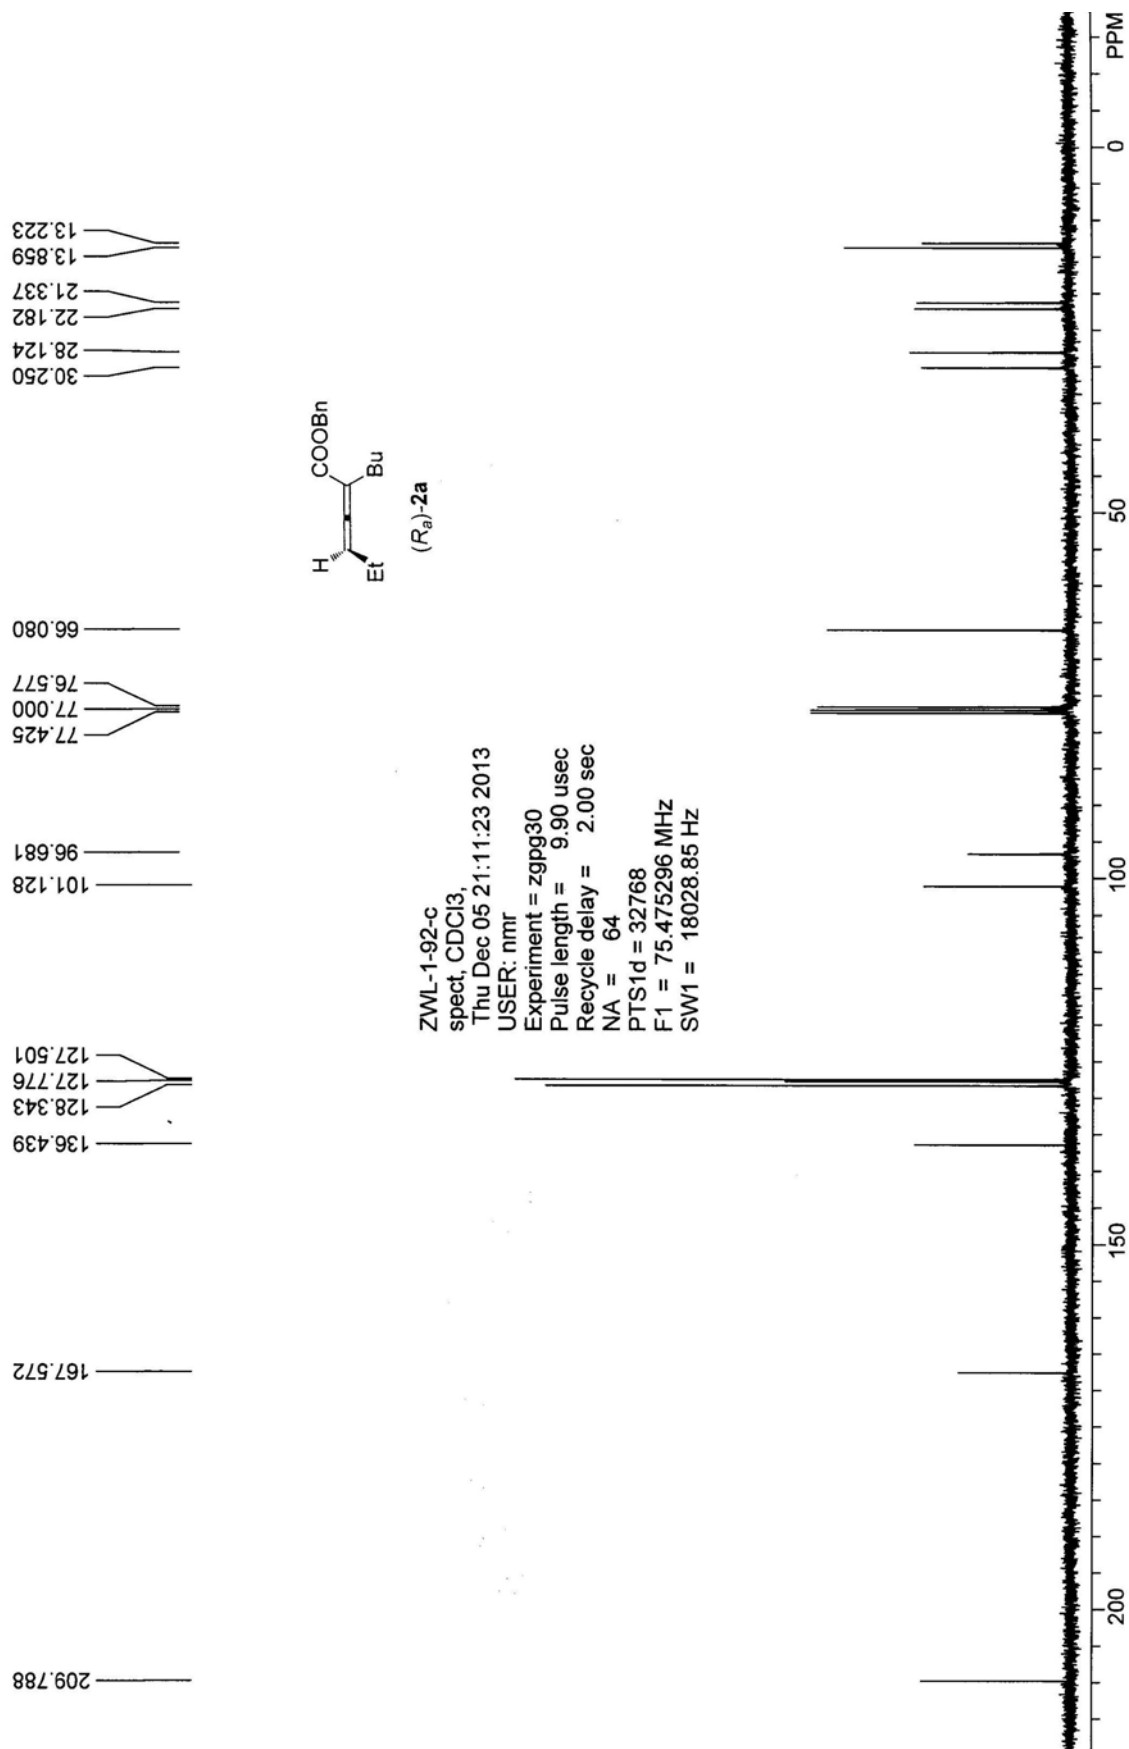

**81 zwl-1-92-wheelk-S,S-200-1-0.5-214**

|                  |                                   |                   |          |
|------------------|-----------------------------------|-------------------|----------|
| Sample Name:     | zw1-1-92-wheelk-S,S-200-1-0.5-214 | Injection Volume: | 20.0     |
| Vial Number:     | 81                                | Channel:          | UV_VIS_1 |
| Sample Type:     | unknown                           | Wavelength:       | 214      |
| Control Program: | zw1-allenoate                     | Bandwidth:        | n.a.     |
| Quantif. Method: | test                              | Dilution Factor:  | 1.0000   |
| Recording Time:  | 2013-3-16 14:56                   | Sample Weight:    | 1.0000   |
| Run Time (min):  | 20.27                             | Sample Amount:    | 1.0000   |

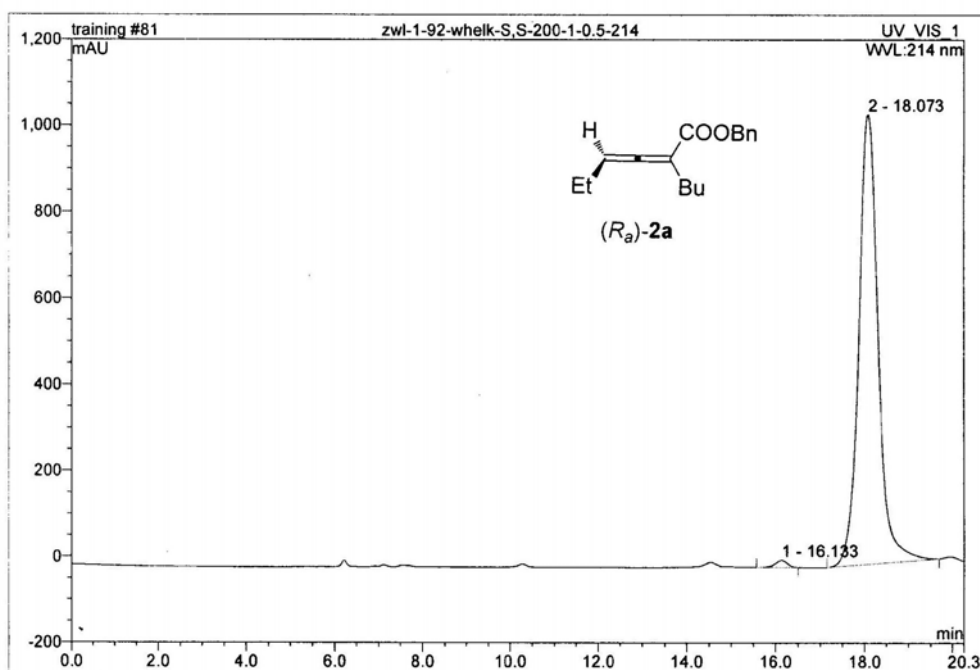

| No.    | Ret.Time<br>min | Peak Name | Height<br>mAU | Area<br>mAU*min | Rel.Area<br>% | Amount | Type |
|--------|-----------------|-----------|---------------|-----------------|---------------|--------|------|
| 1      | 16.13           | n.a.      | 16.606        | 5.302           | 1.00          | n.a.   | BMB  |
| 2      | 18.07           | n.a.      | 1042.303      | 526.108         | 99.00         | n.a.   | BMB  |
| Total: |                 |           | 1058.909      | 531.410         | 100.00        | 0.000  |      |

**84 zwl-1-25-whelk-S,S-200-1-0.5-214-rac**

|                  |                                      |                   |          |
|------------------|--------------------------------------|-------------------|----------|
| Sample Name:     | zwl-1-25-whelk-S,S-200-1-0.5-214-rac | Injection Volume: | 20.0     |
| Vial Number:     | 84                                   | Channel:          | UV_VIS_1 |
| Sample Type:     | unknown                              | Wavelength:       | 214      |
| Control Program: | zwl-allenoate                        | Bandwidth:        | n.a.     |
| Quantif. Method: | test                                 | Dilution Factor:  | 1.0000   |
| Recording Time:  | 2013-3-16 15:59                      | Sample Weight:    | 1.0000   |
| Run Time (min):  | 19.44                                | Sample Amount:    | 1.0000   |

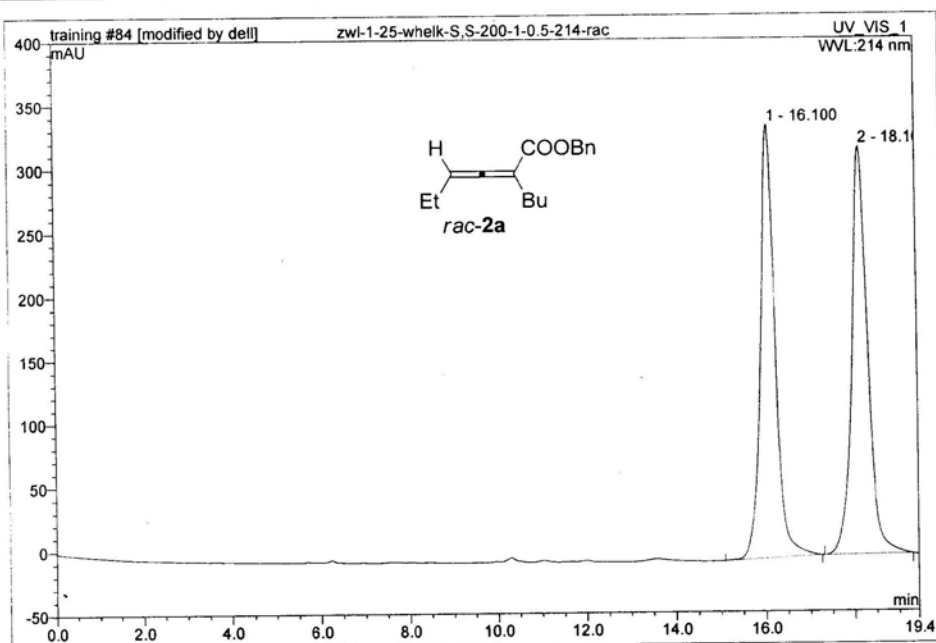

| No.    | Ret. Time<br>min | Peak Name | Height<br>mAU | Area<br>mAU*min | Rel. Area<br>% | Amount | Type |
|--------|------------------|-----------|---------------|-----------------|----------------|--------|------|
| 1      | 16.10            | n.a.      | 340.382       | 129.324         | 49.69          | n.a.   | BMB* |
| 2      | 18.16            | n.a.      | 320.346       | 130.924         | 50.31          | n.a.   | BMB* |
| Total: |                  |           | 660.728       | 260.248         | 100.00         | 0.000  |      |

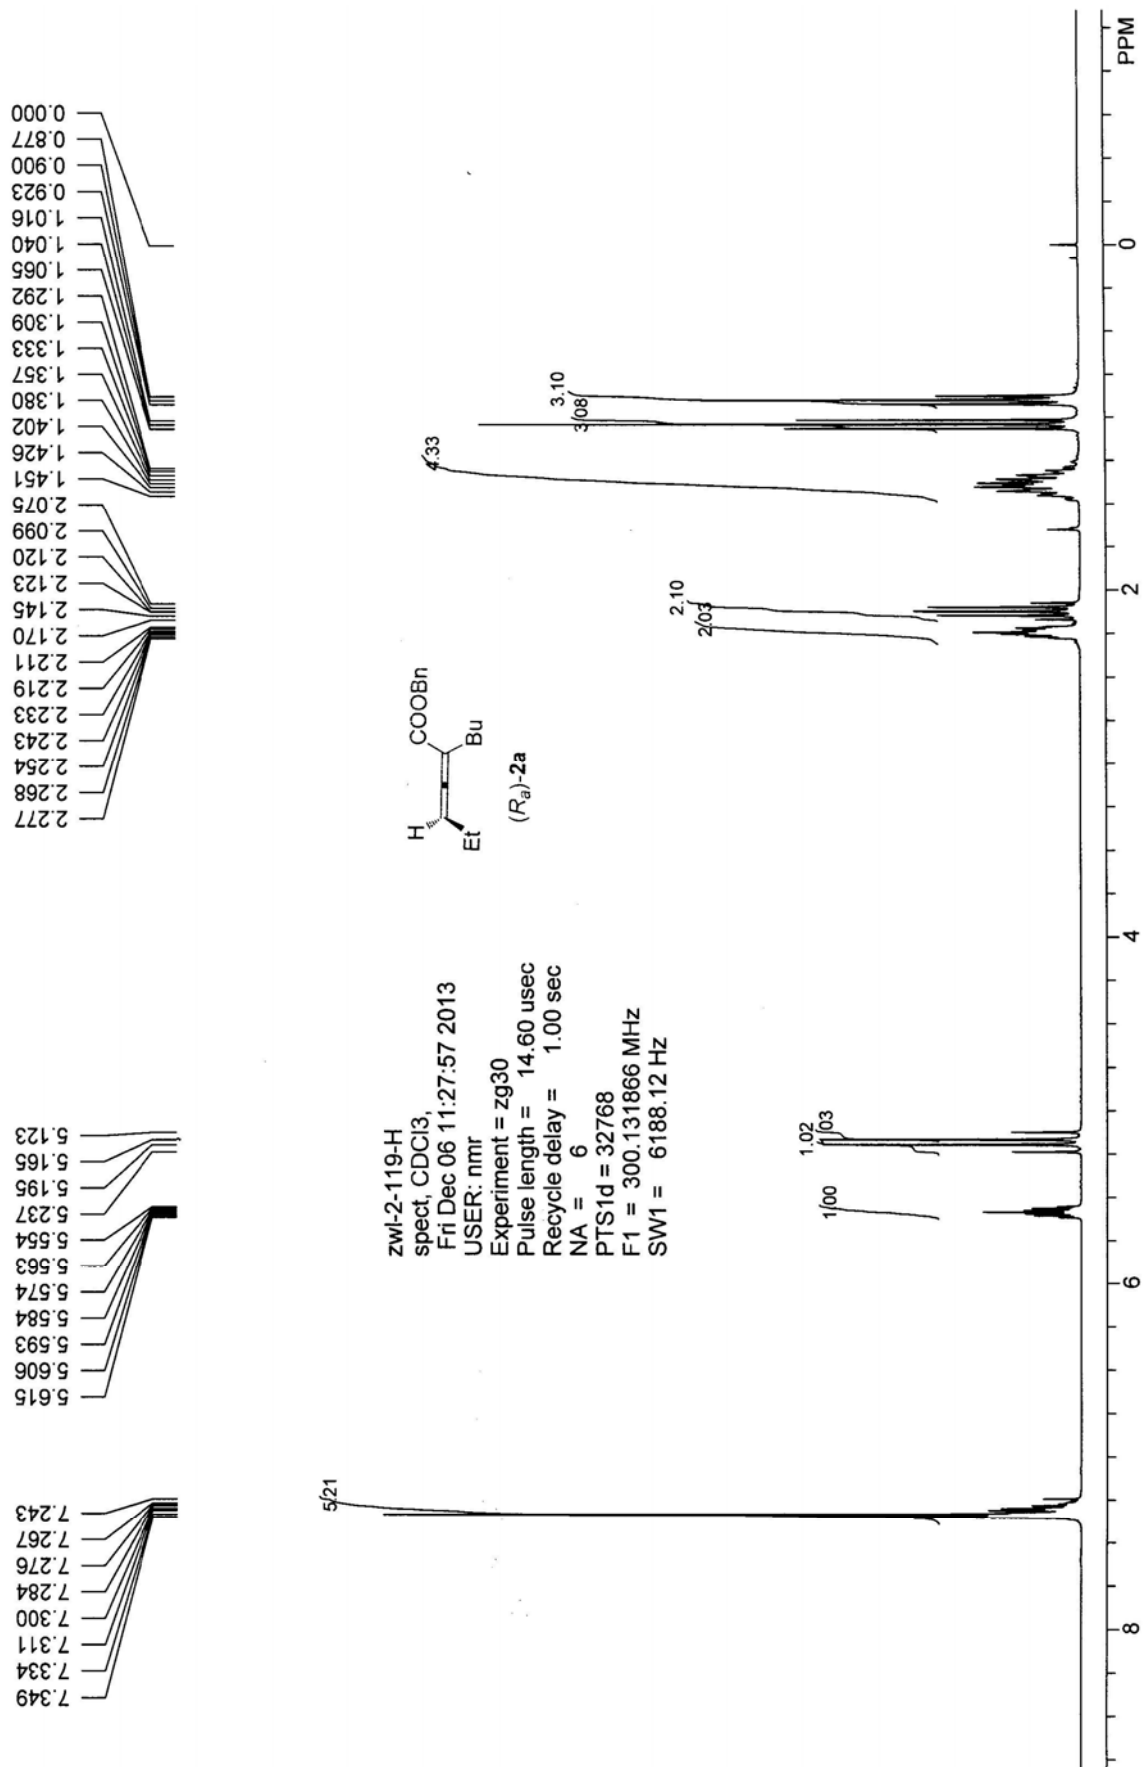

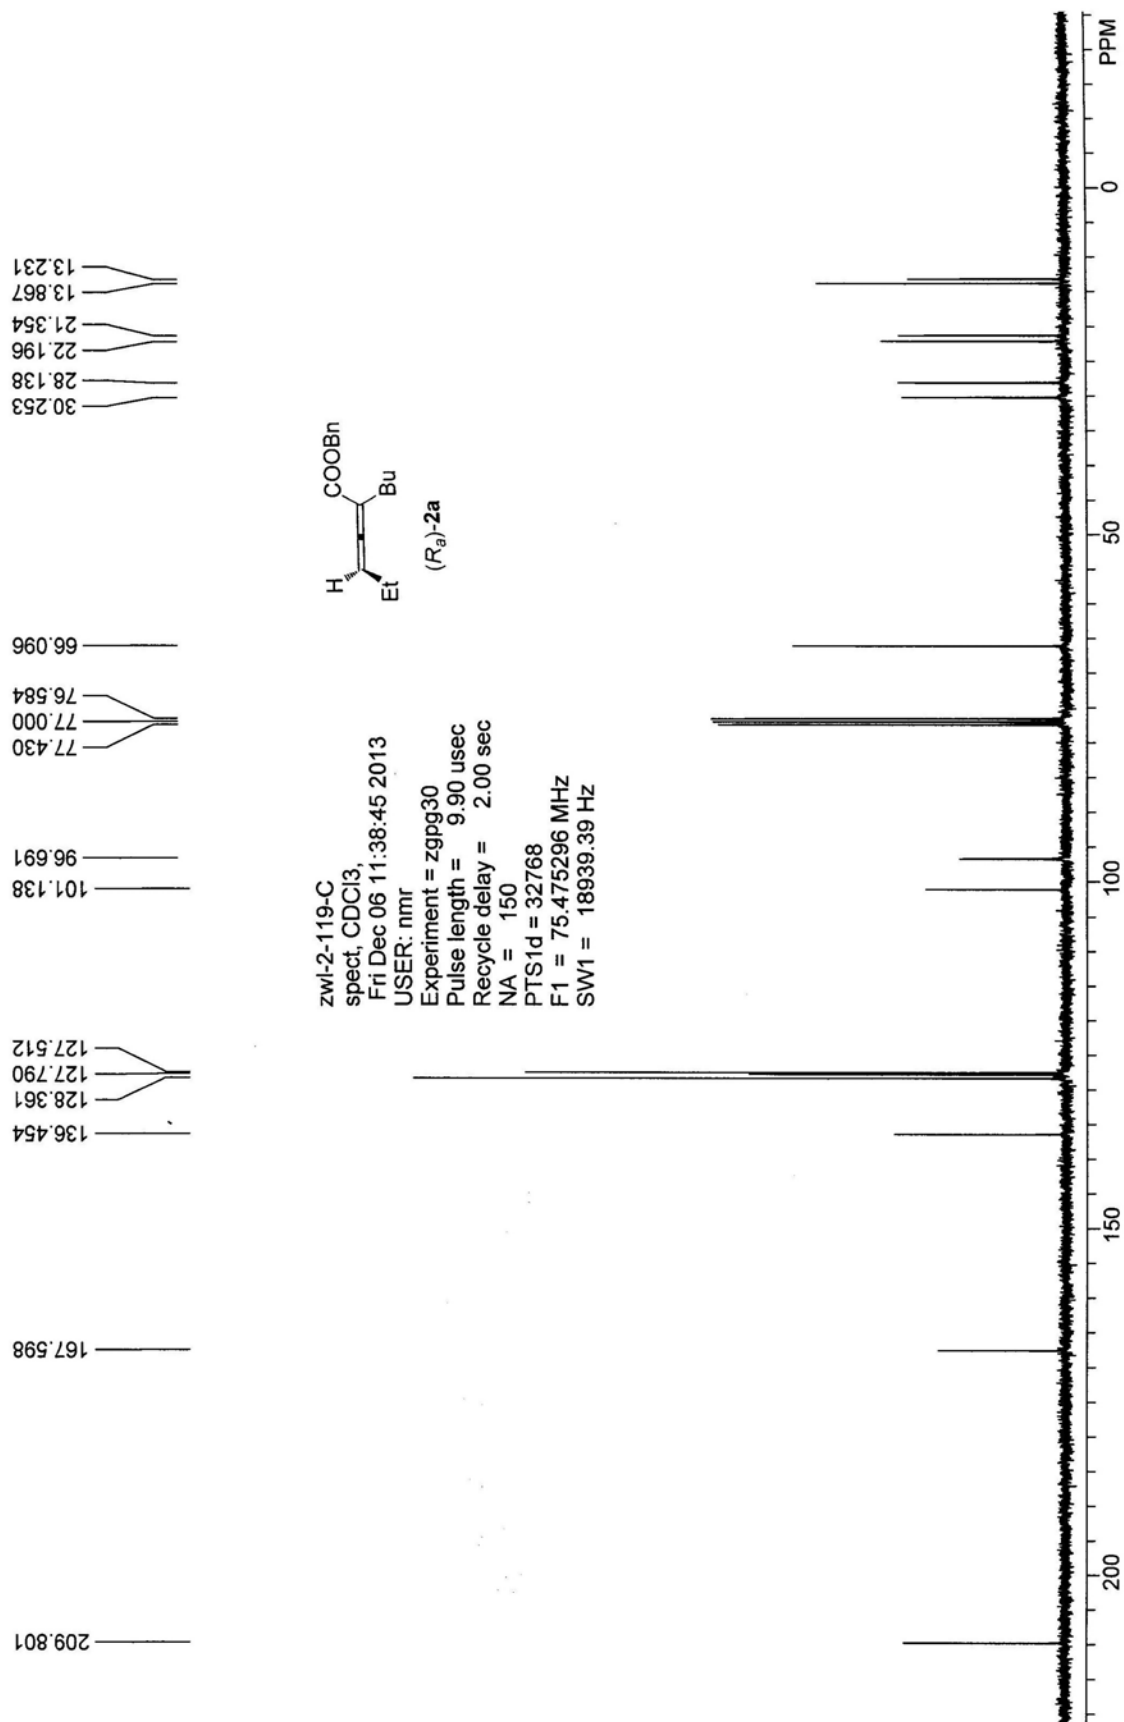



## SAMPLE INFORMATION

Sample Name: zw-2-119-whale-200-1-1-214  
Sample Type: 未知  
Vial: 1  
Injection #: 17  
Injection Volume: 10.00  $\mu$ l  
Run Time: 20.00 Minutes

Acquired By: Breeze  
Date Acquired: 2013/10/23 13:05:06 CST  
Acq. Method: zg100  
Date Processed: 2013/10/23 13:40:29 CST  
Channel Name: V2489 CHA  
Sample Set Name:

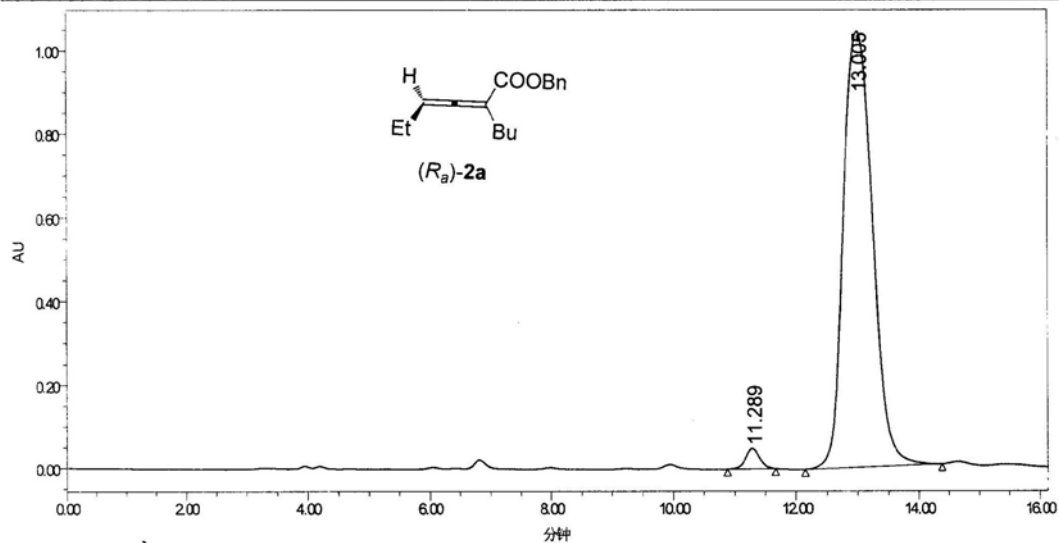

|   | RT<br>(min) | Area<br>(AUsec) | %Area | Height<br>(AU) | %<br>Height |
|---|-------------|-----------------|-------|----------------|-------------|
| 1 | 11.289      | 783852          | 2.21  | 49414          | 4.52        |
| 2 | 13.008      | 34655380        | 97.79 | 1044699        | 95.48       |

# SAMPLE INFORMATION

|                   |                           |                  |                         |
|-------------------|---------------------------|------------------|-------------------------|
| Sample Name:      | zw-1-25-whale-200-1-1-214 | Acquired By:     | Breeze                  |
| Sample Type:      | 未知                        | Date Acquired:   | 2013/10/23 12:06:48 CST |
| Vial:             | 1                         | Acq. Method:     | zgj100                  |
| Injection #:      | 14                        | Date Processed:  | 2013/10/23 13:39:27 CST |
| Injection Volume: | 10.00 uL                  | Channel Name:    | V2489 ChA               |
| Run Time:         | 160.00 Minutes            | Sample Set Name: |                         |

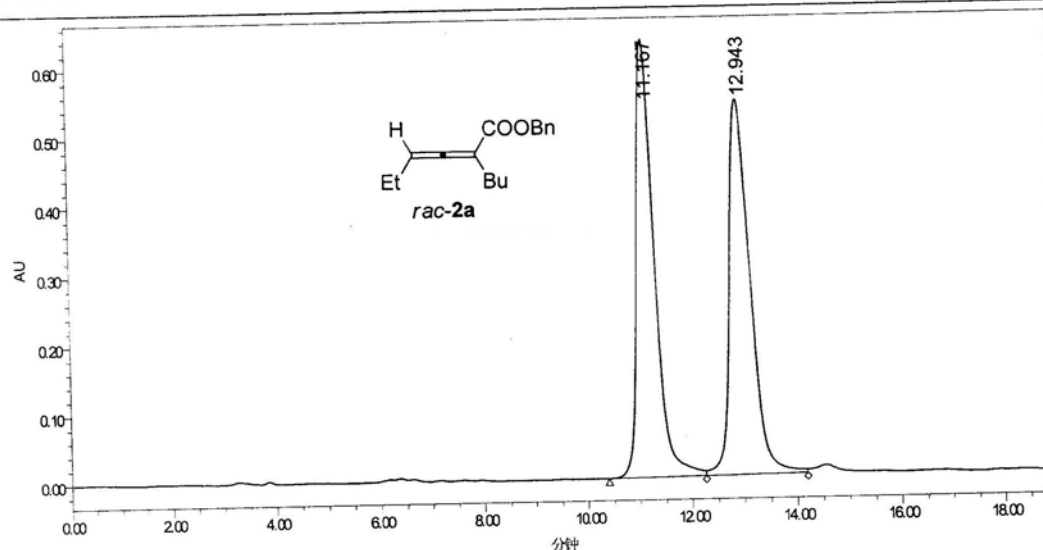

|   | RT<br>(min) | Area<br>(AUsec) | %Area | Height<br>(AU) | %<br>Height |
|---|-------------|-----------------|-------|----------------|-------------|
| 1 | 11.167      | 15160646        | 50.03 | 635354         | 53.88       |
| 2 | 12.943      | 15142193        | 49.97 | 543942         | 46.12       |

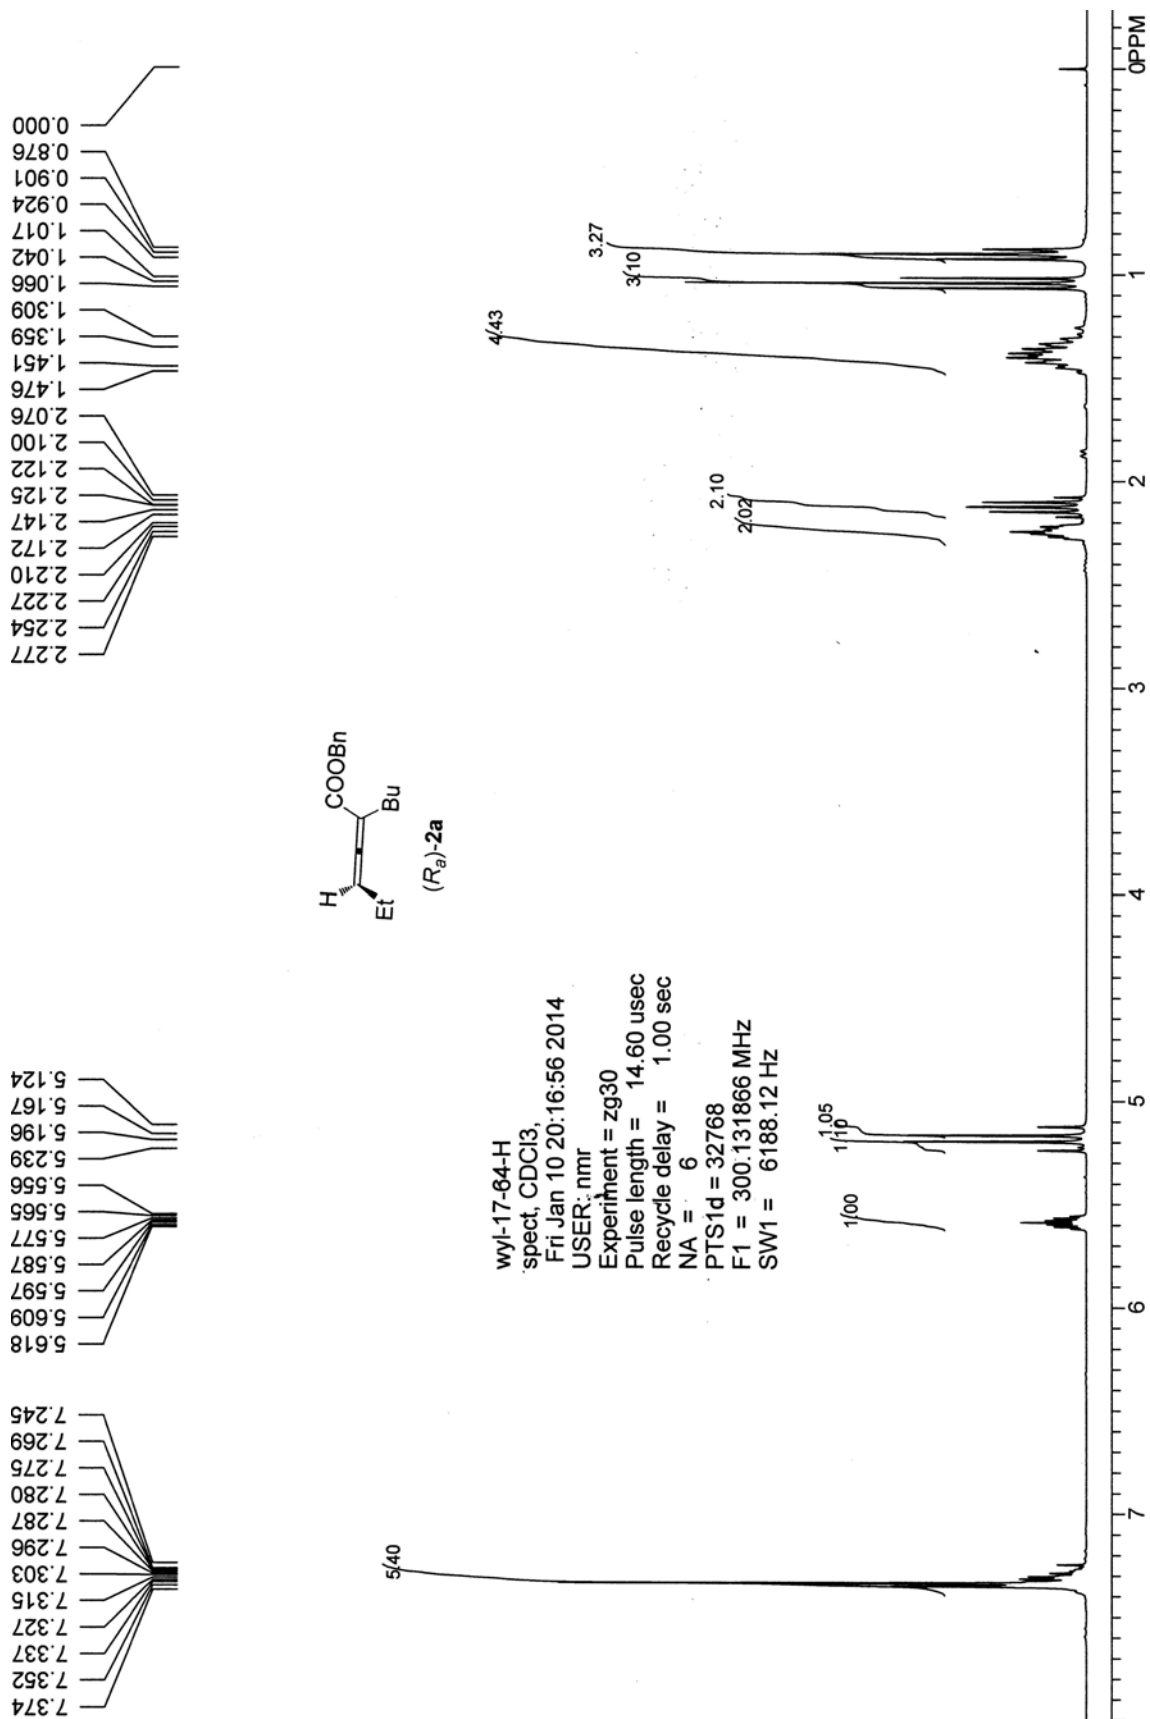

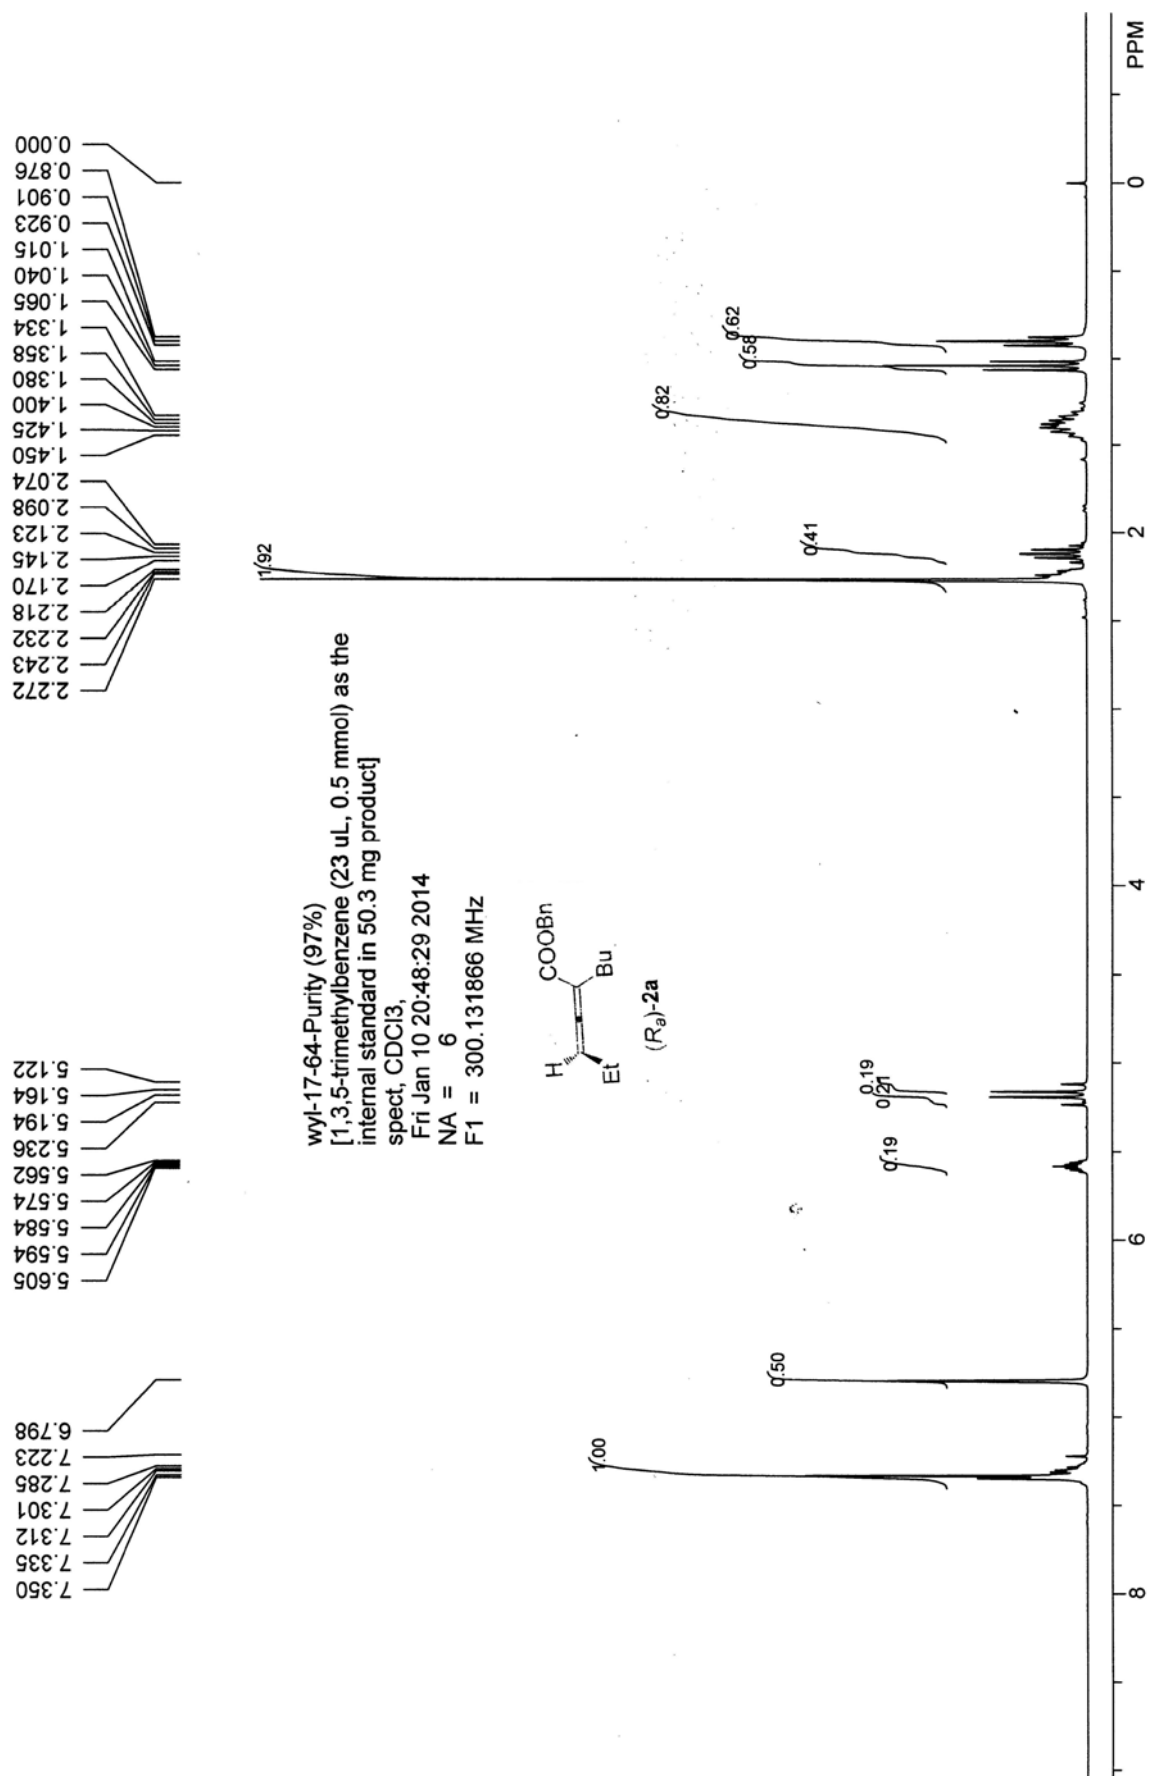

wyl-17-64-Purity (97%)  
 [1,3,5-trimethylbenzene (23  $\mu\text{L}$ , 0.5 mmol) as the  
 internal standard in 50.3 mg product]  
 spect,  $\text{CDCl}_3$ ,  
 Fri Jan 10 20:48:29 2014  
 NA = 6  
 F1 = 300.131866 MHz

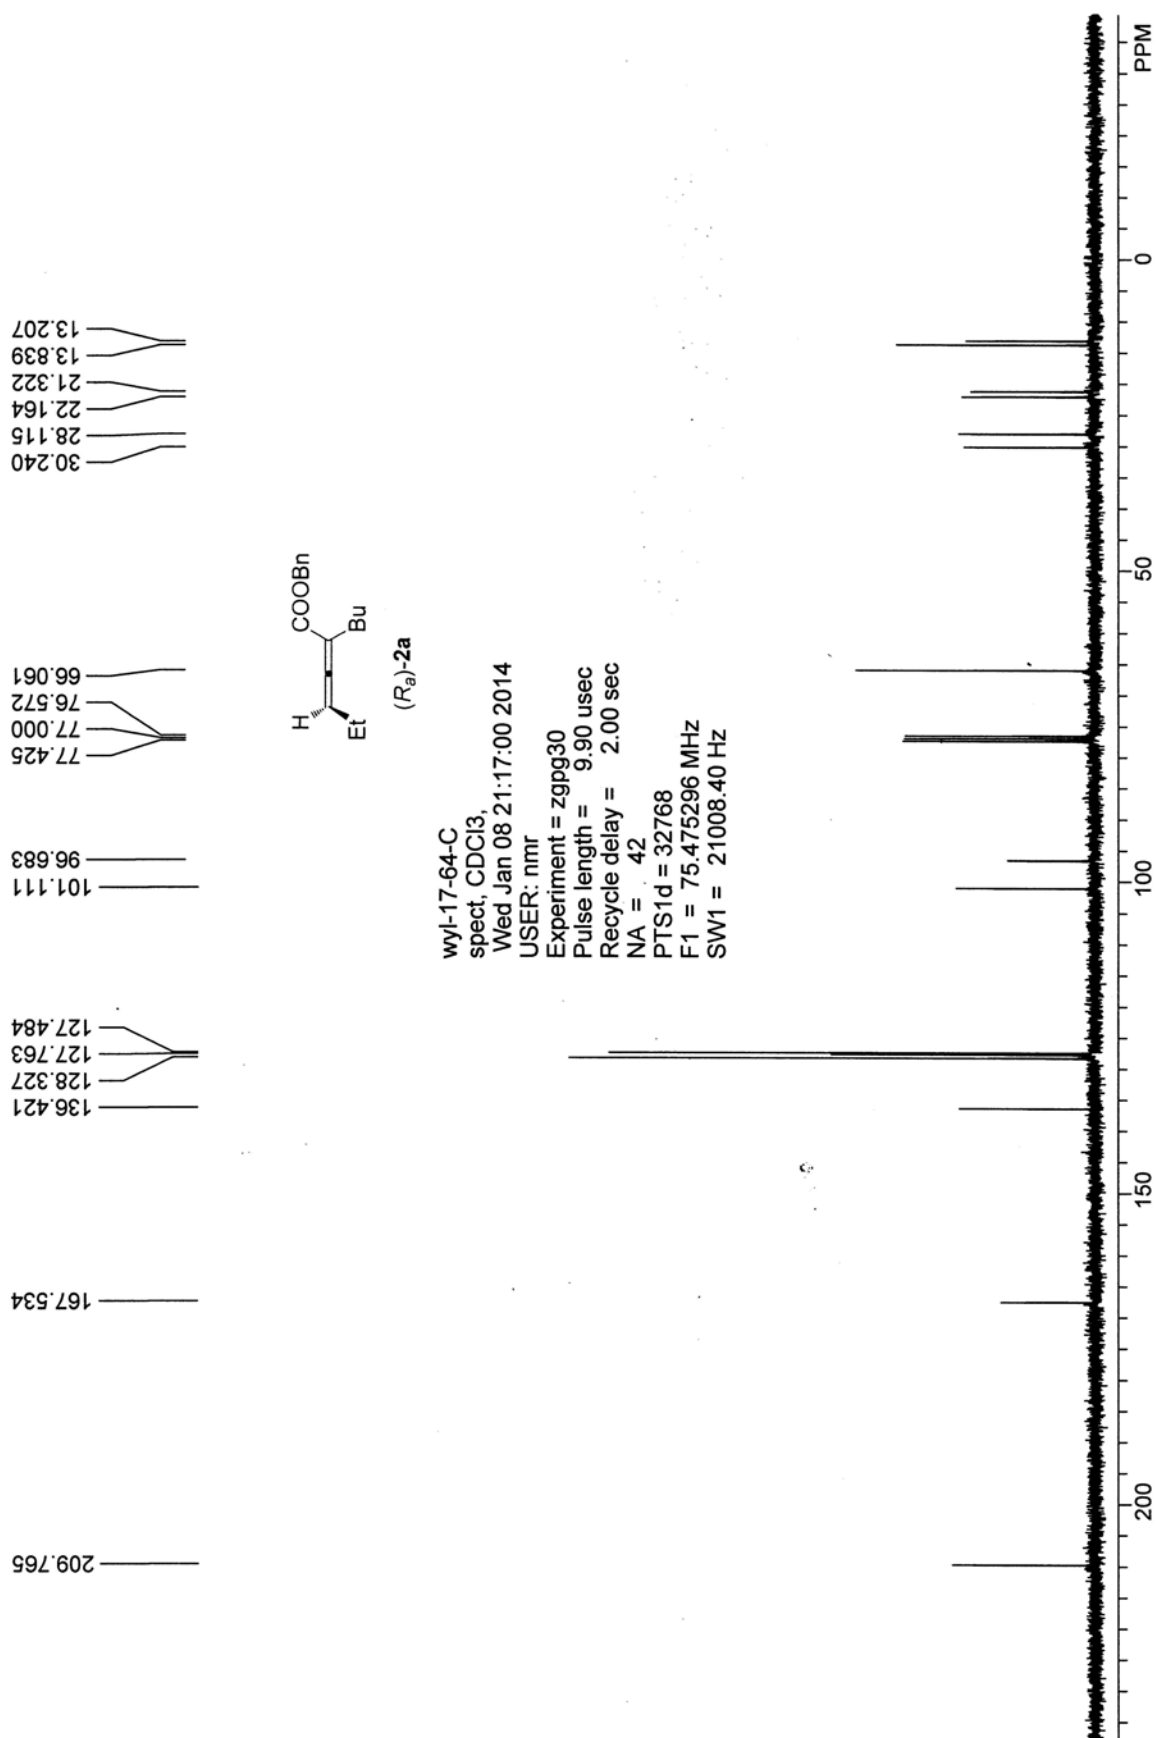

## SAMPLE INFORMATION

|                   |                             |                  |                       |
|-------------------|-----------------------------|------------------|-----------------------|
| Sample Name:      | wyl-17-64-whale-200-1-1-214 | Acquired By:     | Breeze                |
| Sample Type:      | 未知                          | Date Acquired:   | 2014/1/3 14:57:26 CST |
| Vial:             | 1                           | Acq. Method:     | zg100                 |
| Injection #:      | 22                          | Date Processed:  | 2014/1/3 16:48:20 CST |
| Injection Volume: | 10.00 ul                    | Channel Name:    | V2489 ChA             |
| Run Time:         | 100.00 Minutes              | Sample Set Name: |                       |

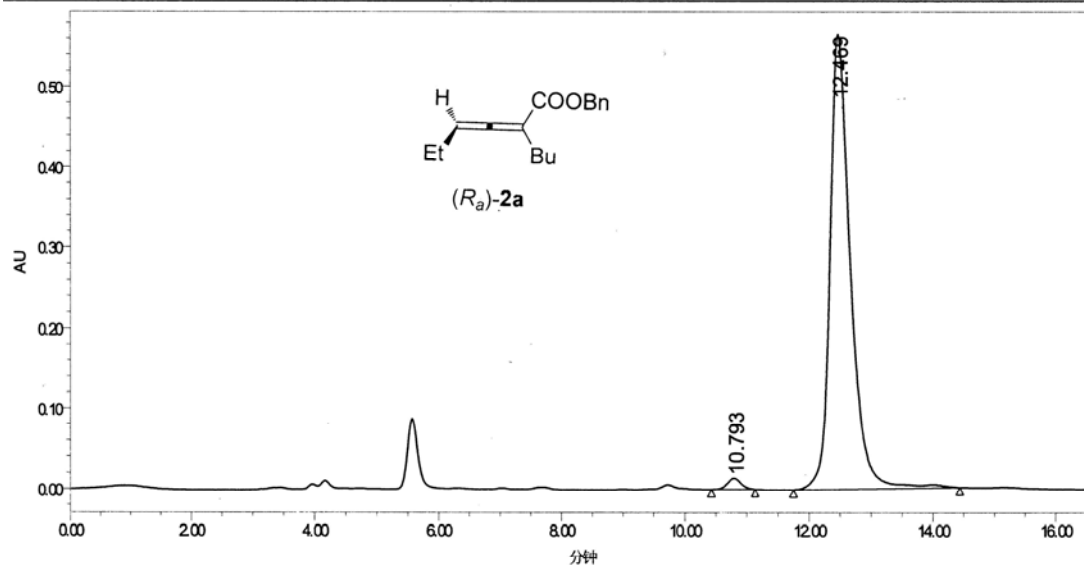

|   | RT<br>(min) | Area<br>(AUsec) | %Area | Height<br>(AU) | %<br>Height |
|---|-------------|-----------------|-------|----------------|-------------|
| 1 | 10.793      | 217533          | 1.66  | 14194          | 2.45        |
| 2 | 12.466      | 12962557        | 98.35 | 566829         | 97.55       |

## SAMPLE INFORMATION

Sample Name: zwf-1-25-whale-200-1-1-214  
Sample Type: 未知  
Vial: 1  
Injection #: 24  
Injection Volume: 10.00  $\mu$ l  
Run Time: 100.00 MinutesAcquired By: Breeze  
Date Acquired: 2014/1/3 15:36:15 CST  
Acq. Method: zg100  
Date Processed: 2014/1/3 16:46:51 CST  
Channel Name: V0489 CHA  
Sample Set Name: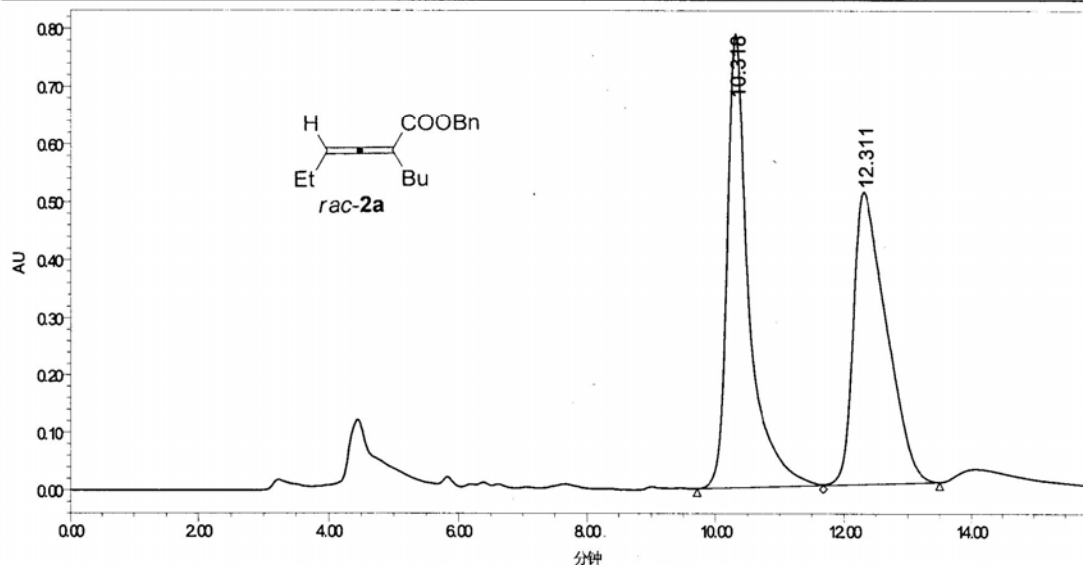

|   | RT<br>(min) | Area<br>(峰面积) | %Area | Height<br>(峰高) | %<br>Height |
|---|-------------|---------------|-------|----------------|-------------|
| 1 | 10.311      | 18390438      | 50.21 | 786657         | 60.82       |
| 2 | 12.311      | 18237239      | 49.79 | 506832         | 39.18       |

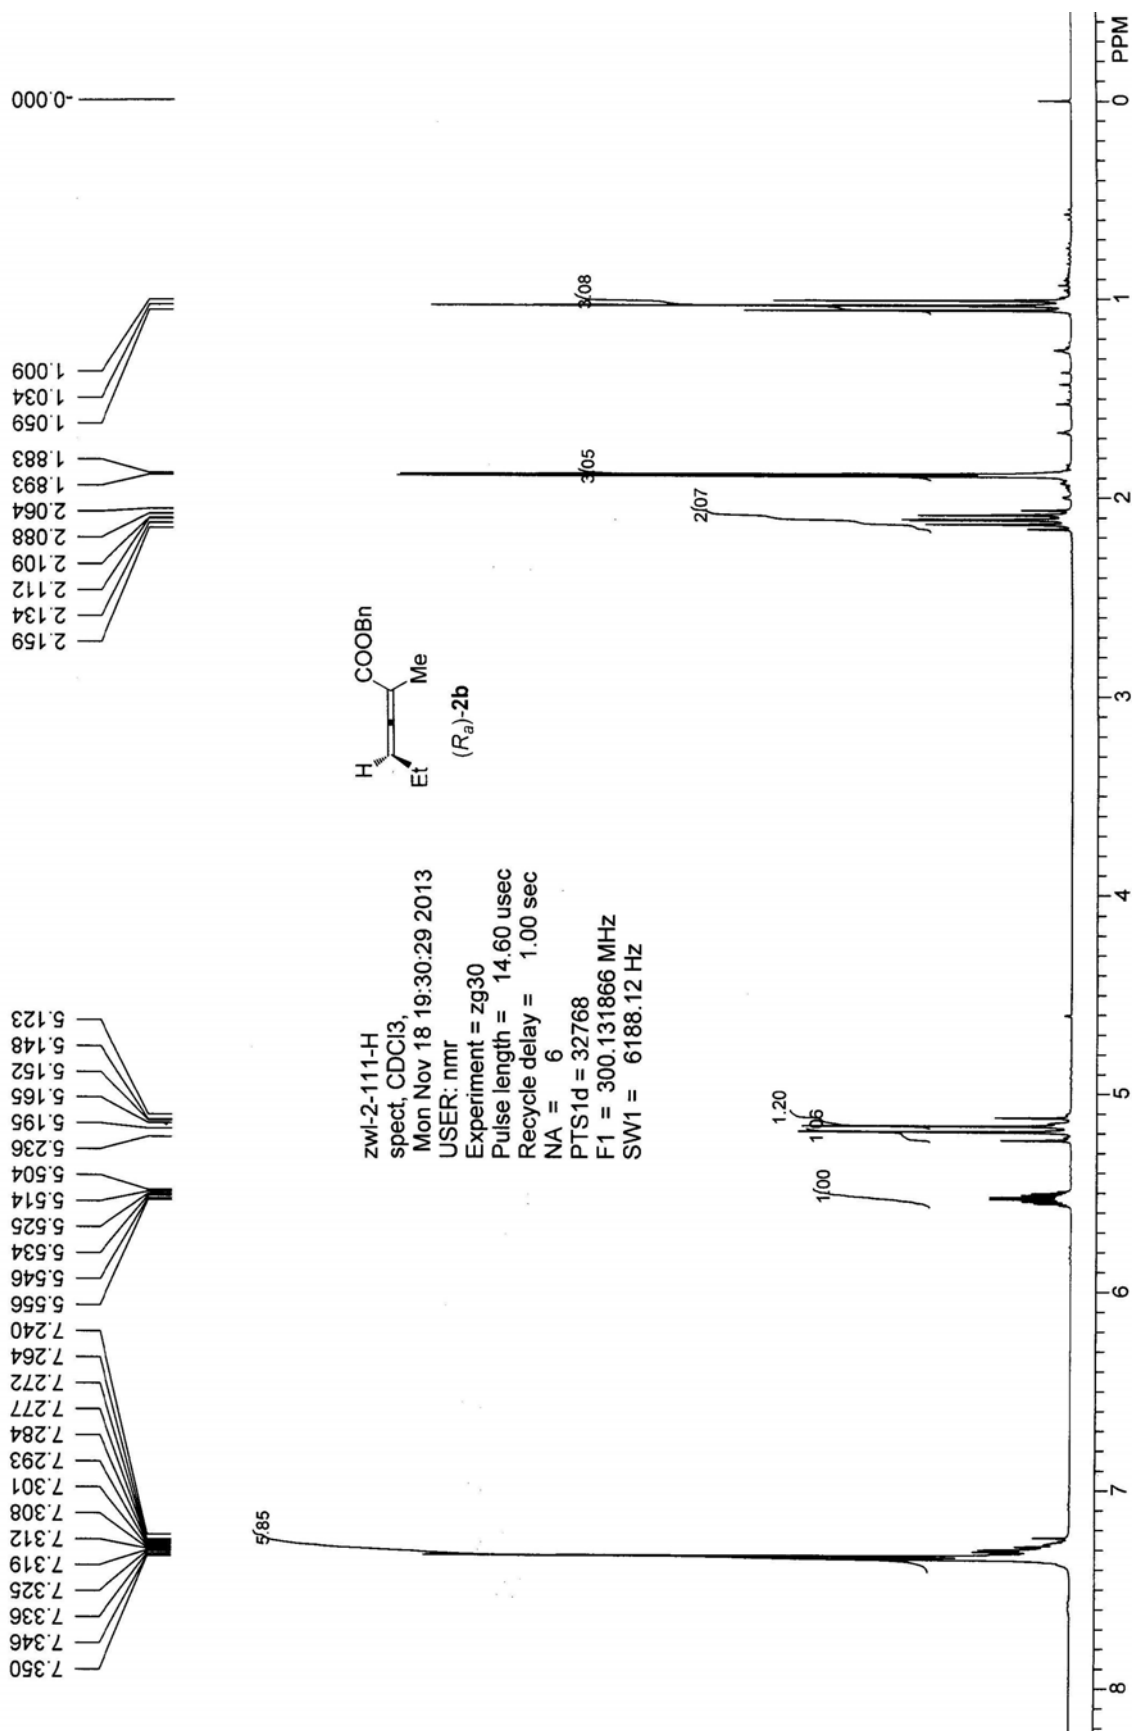



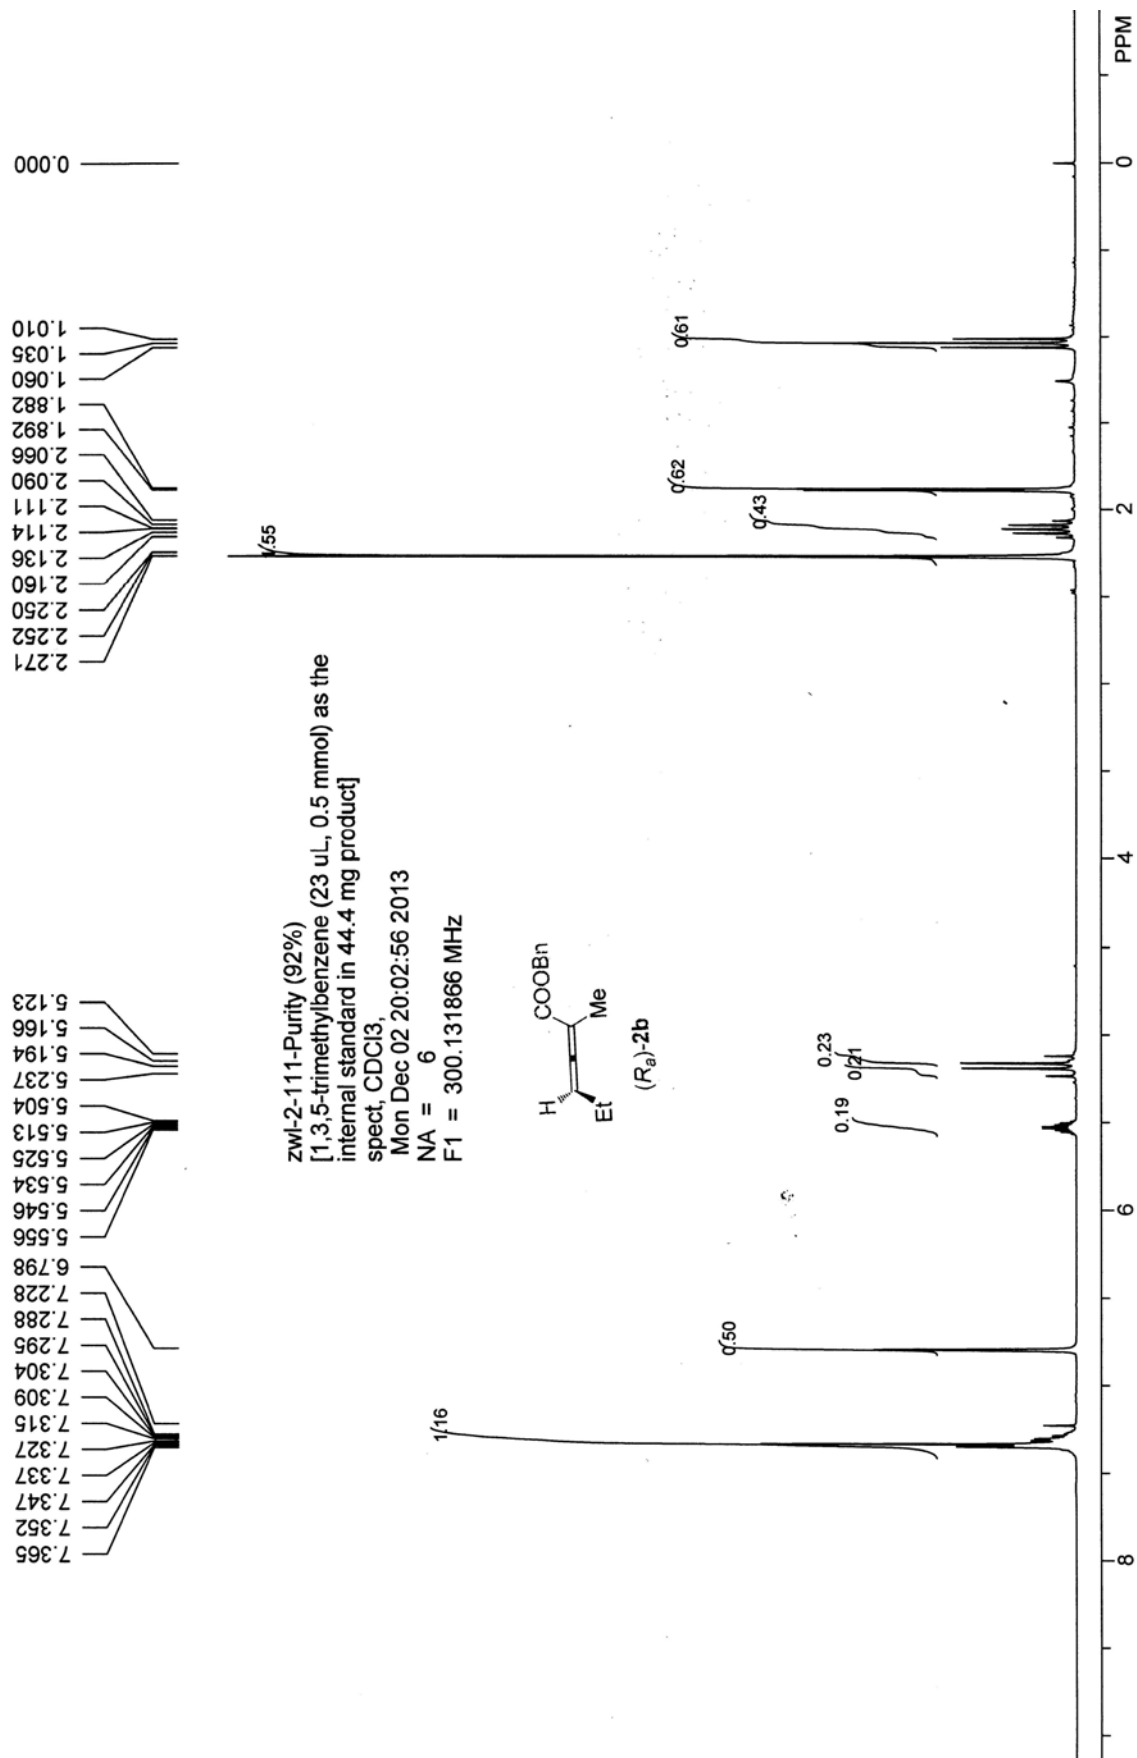

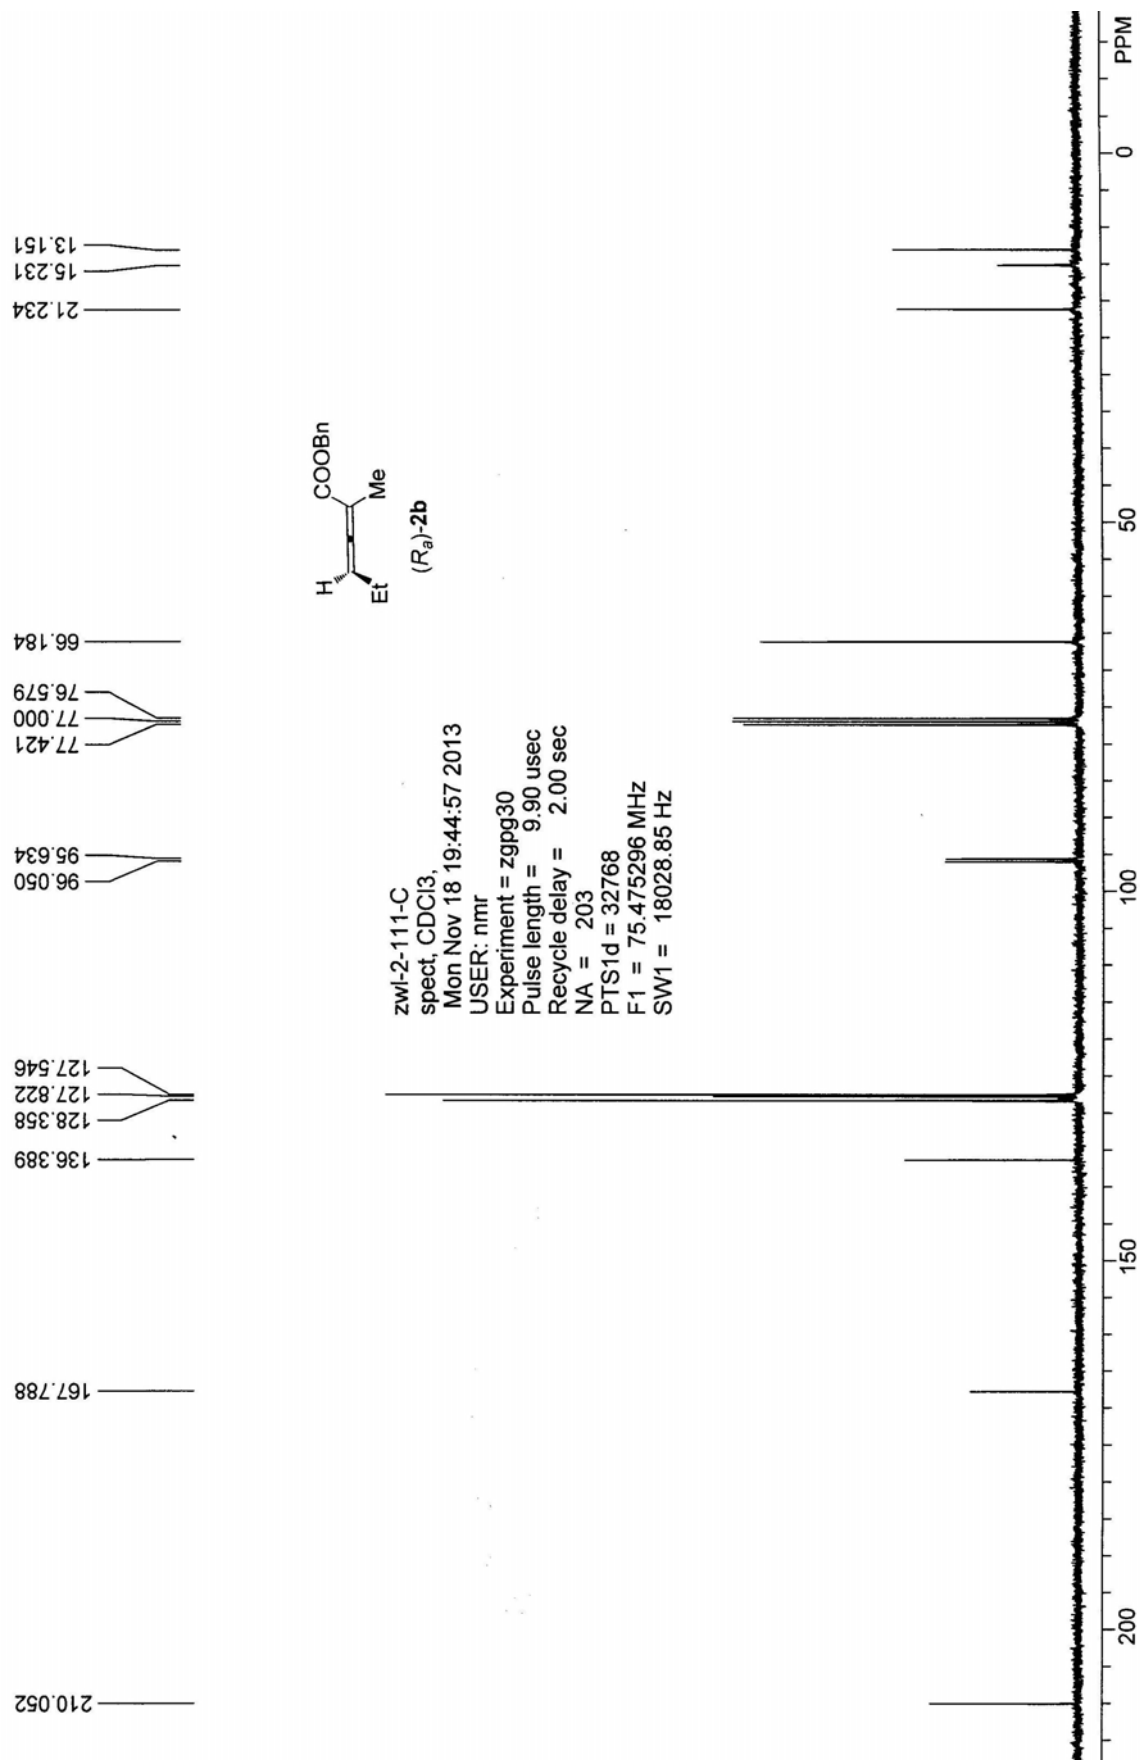

# SAMPLE INFORMATION

|                   |                             |                  |                         |
|-------------------|-----------------------------|------------------|-------------------------|
| Sample Name:      | zwf-2-111-whalk-200-1-1-214 | Acquired By:     | Breeze                  |
| Sample Type:      | 未知                          | Date Acquired:   | 2013/10/17 11:02:23 CST |
| Vial:             | 1                           | Acq. Method:     | zg100                   |
| Injection #:      | 54                          | Date Processed:  | 2013/10/17 17:18:59 CST |
| Injection Volume: | 10.00 $\mu$ l               | Channel Name:    | V0489 ChA               |
| Run Time:         | 16.00 Minutes               | Sample Set Name: |                         |

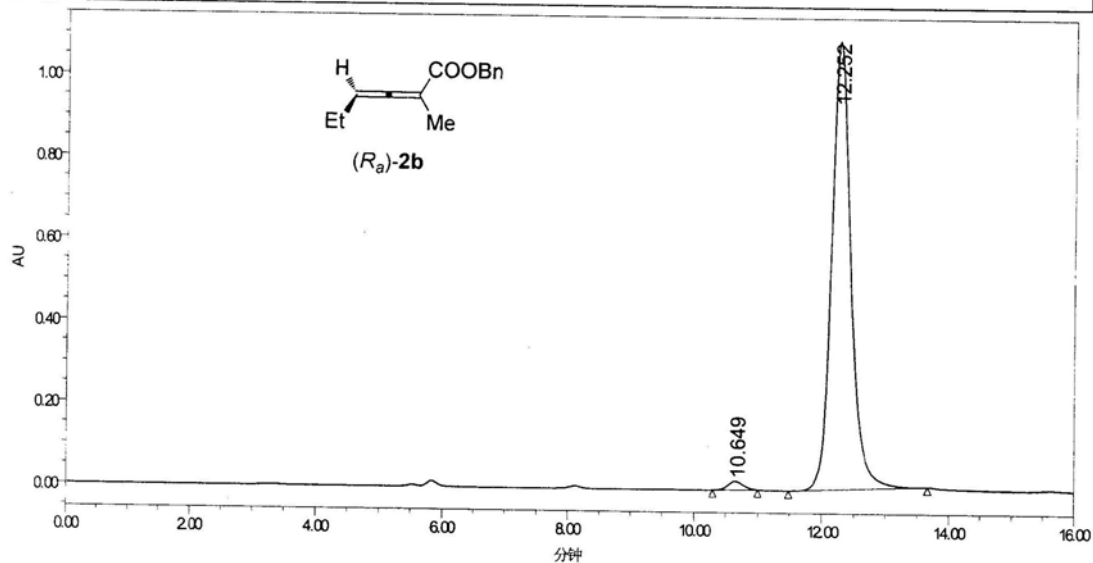

|   | RT<br>(min) | Area<br>(sec) | %Area | Height<br>(mm) | %<br>Height |
|---|-------------|---------------|-------|----------------|-------------|
| 1 | 10.649      | 361224        | 1.56  | 21320          | 1.92        |
| 2 | 12.252      | 22866192      | 98.44 | 1091875        | 98.08       |

中国科学院上海有机化学研究所  
 Project Name: defaults for copy  
 Reported by User: Breeze user (Breeze)

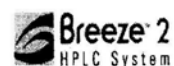

# SAMPLE INFORMATION

|                   |                             |                  |                         |
|-------------------|-----------------------------|------------------|-------------------------|
| Sample Name:      | zwf-2-110-whisk-200-1-1-214 | Acquired By:     | Breeze                  |
| Sample Type:      | 未知                          | Date Acquired:   | 2013/10/17 10:44:03 CST |
| Vial:             | 1                           | Acq. Method:     | zgj100                  |
| Injection #:      | 52                          | Date Processed:  | 2013/10/17 17:18:23 CST |
| Injection Volume: | 10.00 uL                    | Channel Name:    | V2489 CHA               |
| Run Time:         | 35.00 Minutes               | Sample Set Name: |                         |

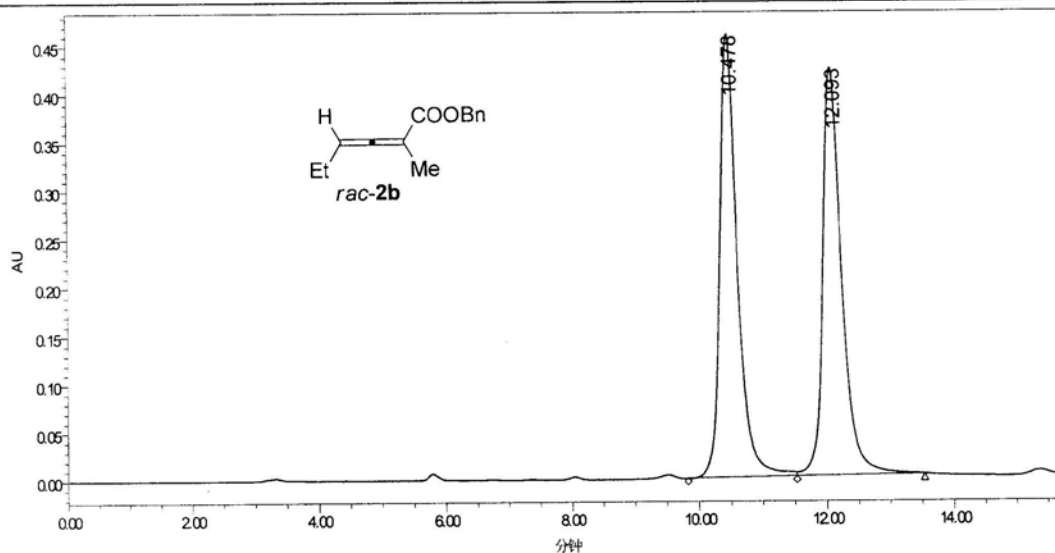

|   | RT<br>(min) | Area<br>(峰面积) | %Area | Height<br>(峰高) | %<br>Height |
|---|-------------|---------------|-------|----------------|-------------|
| 1 | 10.478      | 8747774       | 50.18 | 459668         | 52.08       |
| 2 | 12.093      | 8686717       | 49.82 | 422981         | 47.92       |

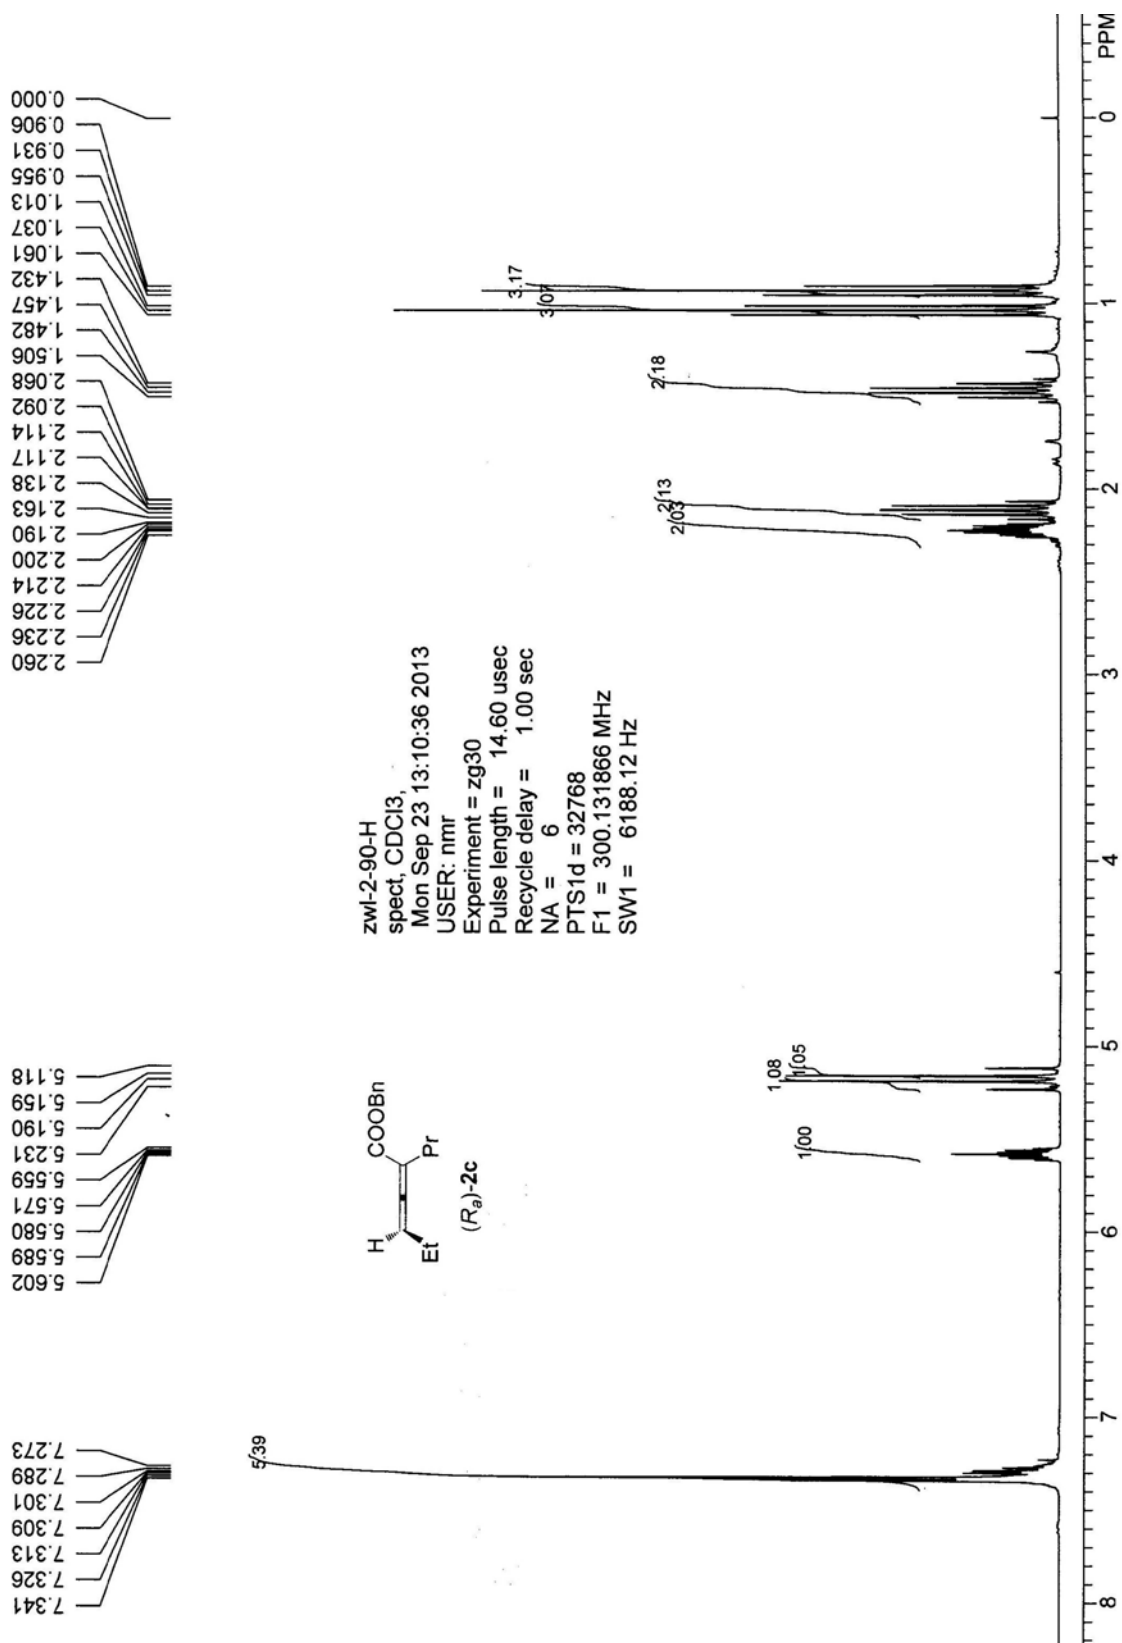

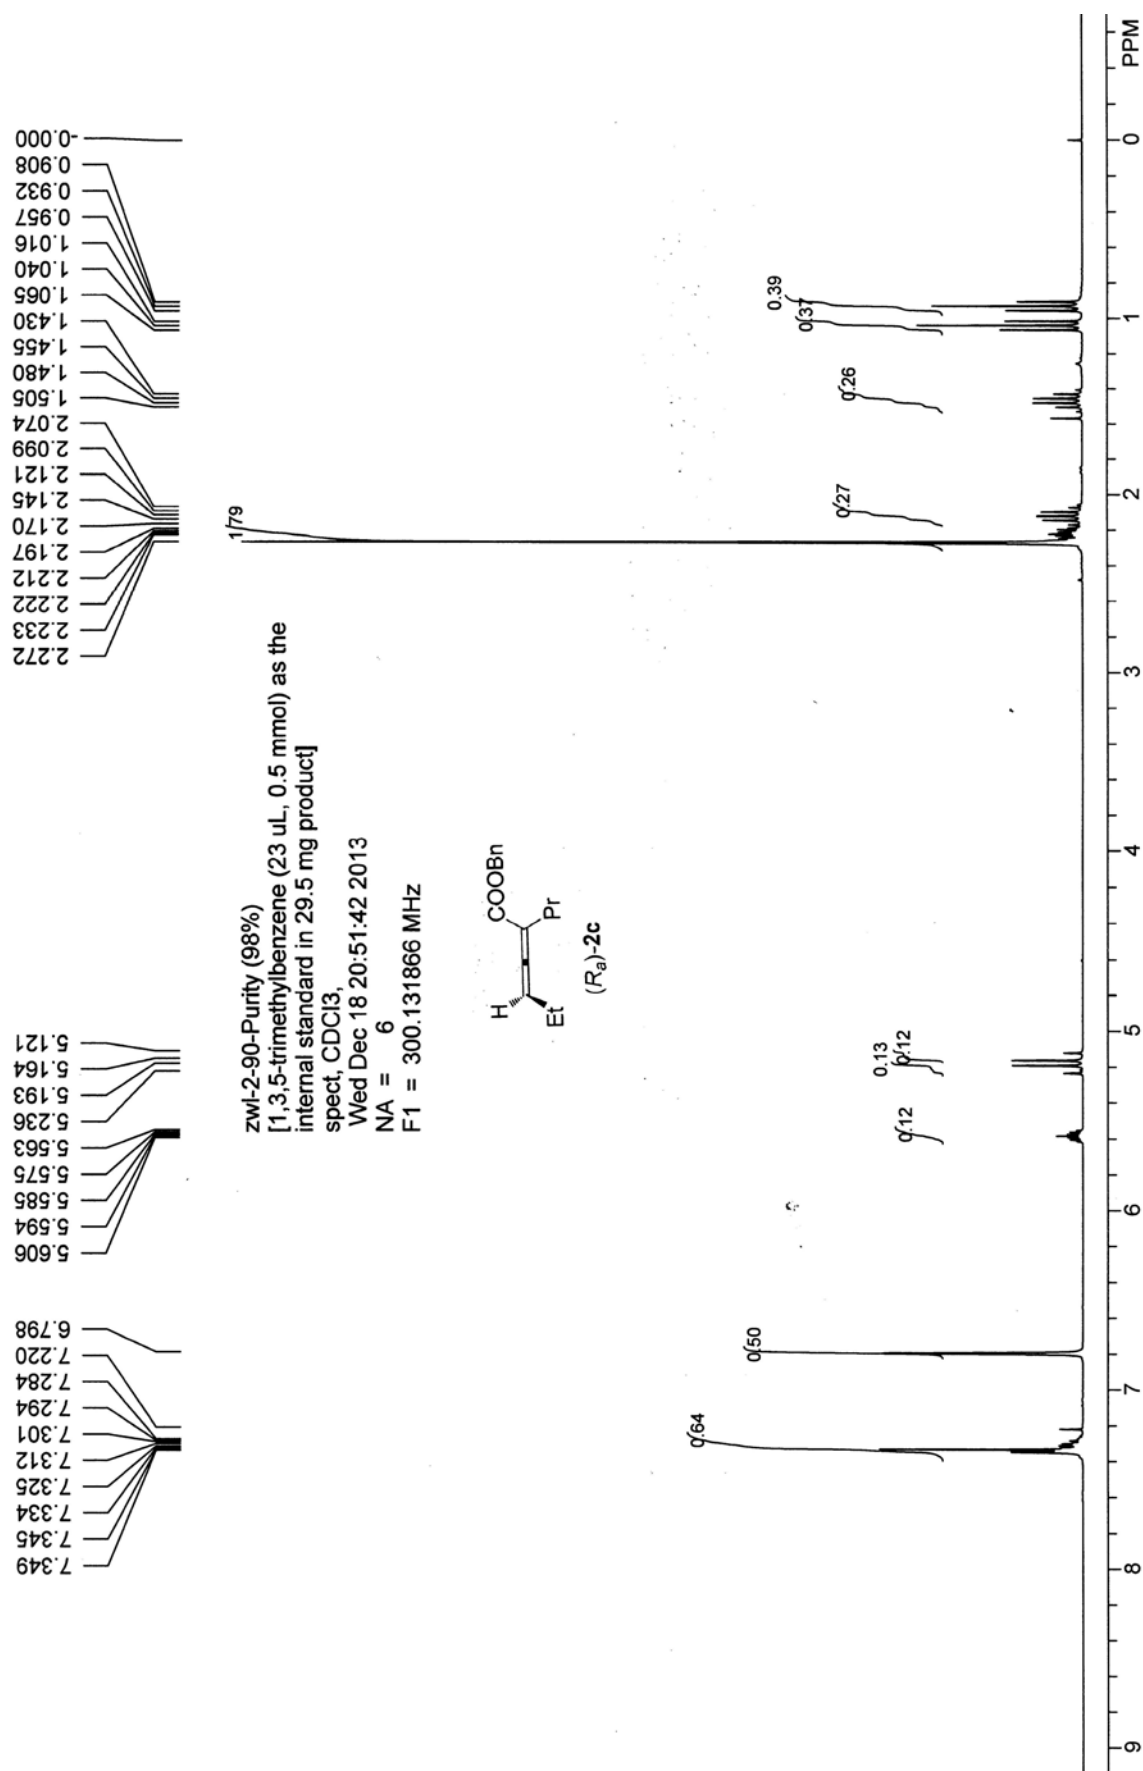

# zw1-2-90-whelk-200-1-1-214

实验时间: 2013/9/24, 10:59:21

报告时间: 2013/9/24, 11:25:35

谱图文件:D:\zhuguangjiong\zw1\20130924\zw1-2-90-whelk-200-1-1-214...org

实验内容简介:

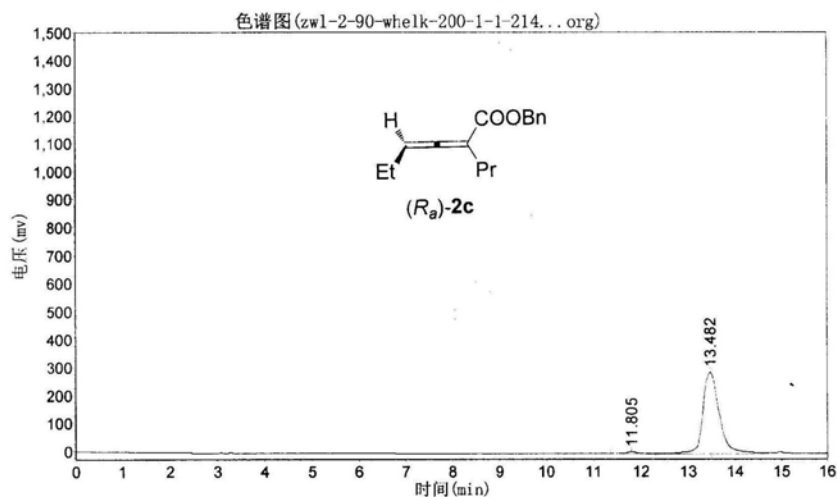

分析结果表

| 峰号 | 峰名 | 保留时间   | 峰高         | 峰面积         | 含量       |
|----|----|--------|------------|-------------|----------|
| 1  |    | 11.805 | 5360.698   | 89576.852   | 1.2682   |
| 2  |    | 13.482 | 291471.531 | 6973487.500 | 98.7318  |
| 总计 |    |        | 296832.229 | 7063064.352 | 100.0000 |

# zw1-2-30-wheelk-200-1-1-214

实验时间: 2013/9/24, 10:26:45

报告时间: 2013/9/24, 11:26:41

谱图文件:D:\zhuguangjiong\zw1\20130924\zw1-2-30-wheelk-200-1-1-214..org

实验内容简介:

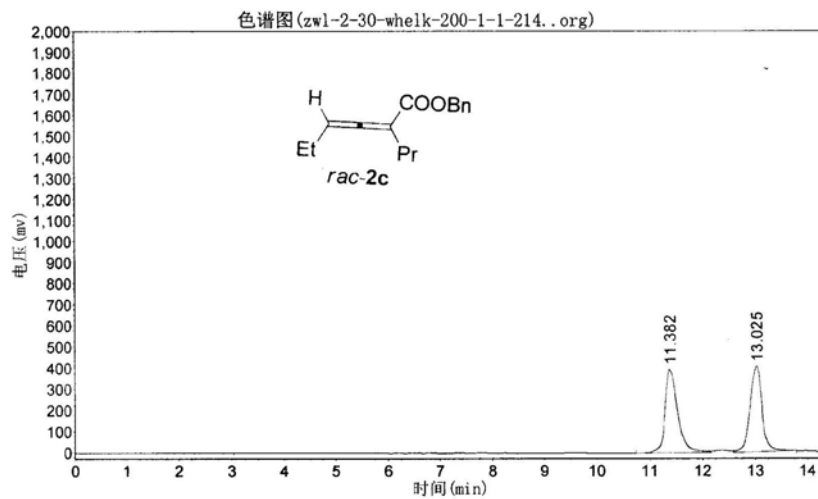

分析结果表

| 峰号 | 峰名 | 保留时间   | 峰高         | 峰面积          | 含量       |
|----|----|--------|------------|--------------|----------|
| 1  |    | 11.382 | 391553.875 | 6489409.500  | 50.2369  |
| 2  |    | 13.025 | 403771.500 | 6428203.500  | 49.7631  |
| 总计 |    |        | 795325.375 | 12917613.000 | 100.0000 |



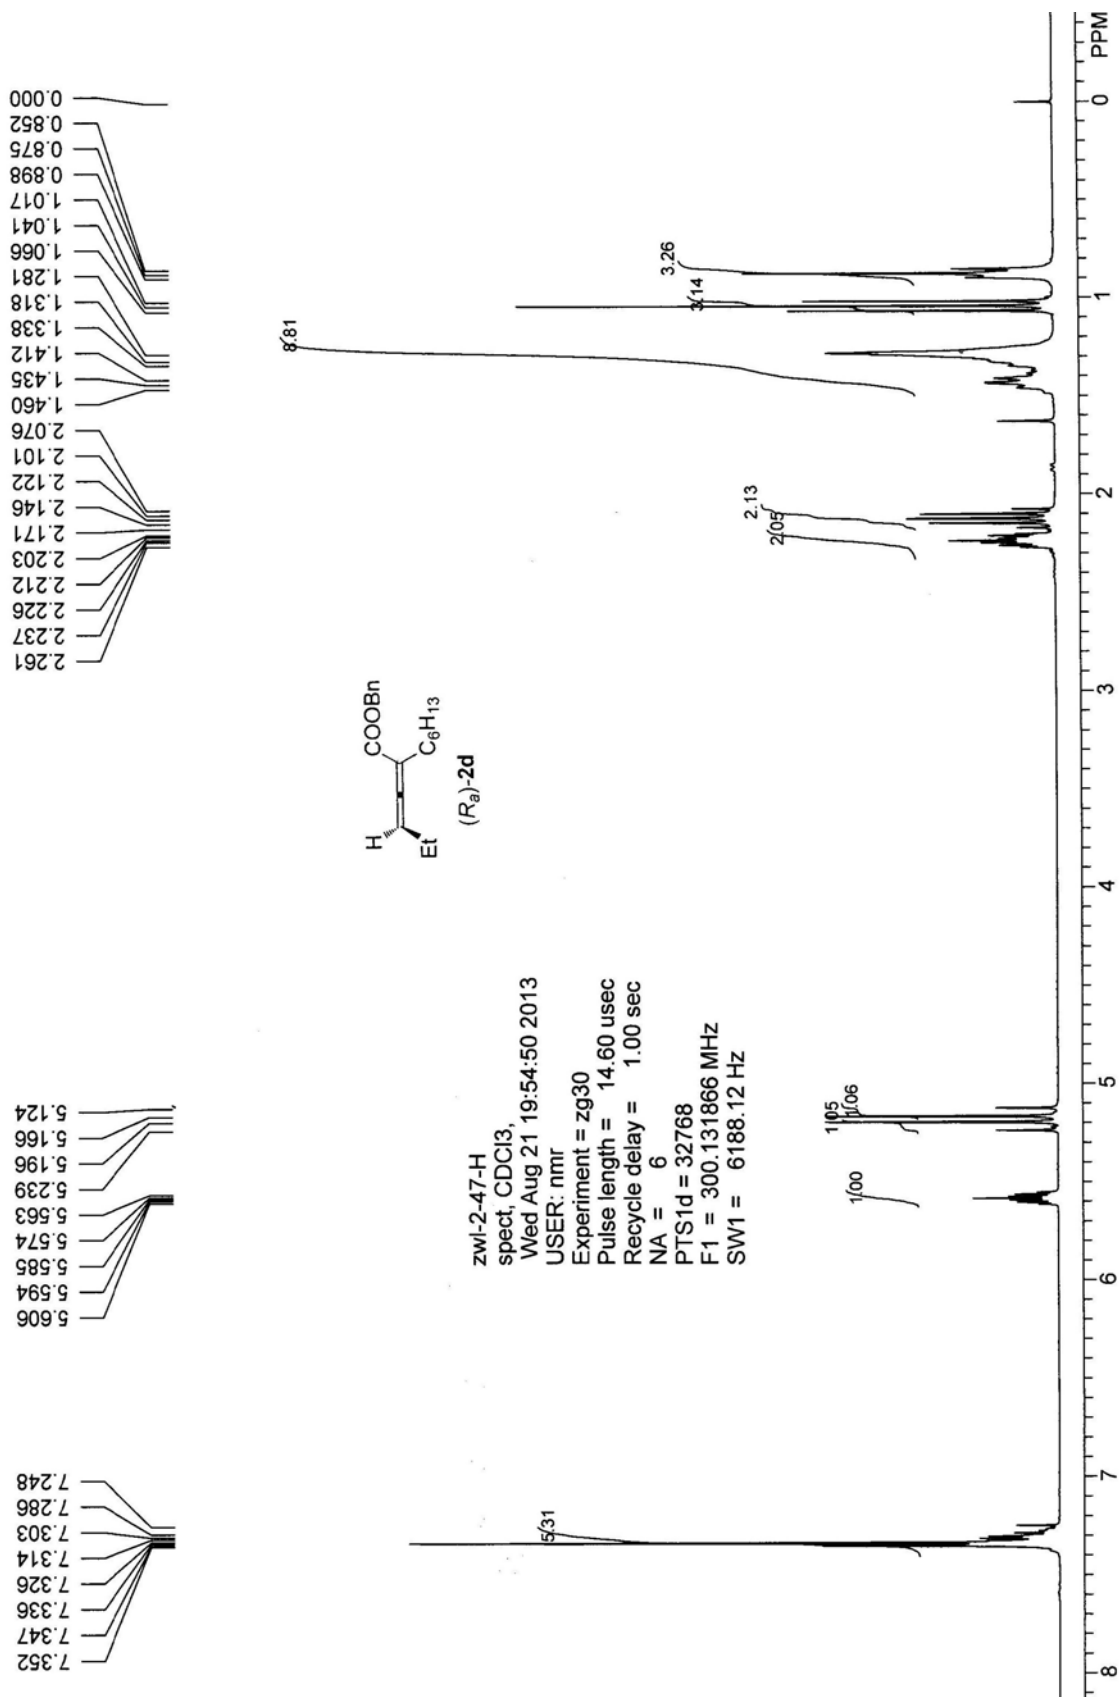

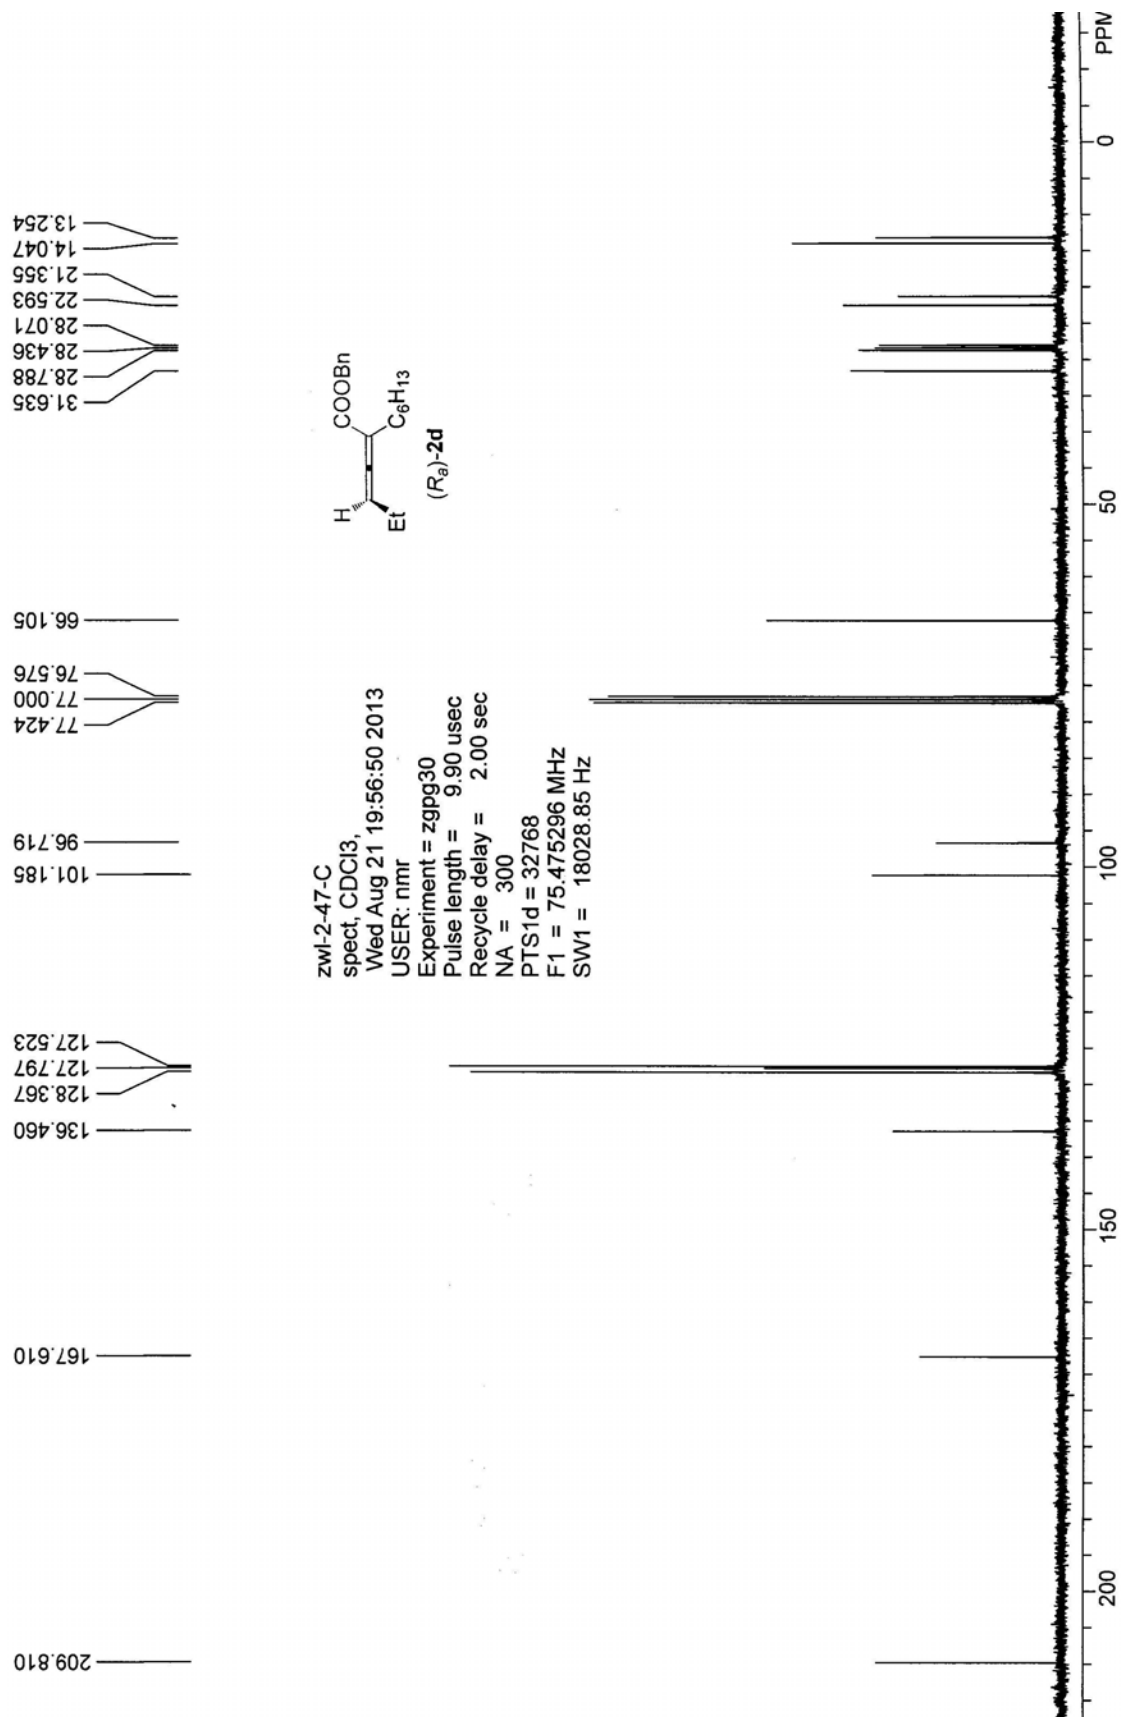

# SAMPLE INFORMATION

|                   |                                 |                  |                       |
|-------------------|---------------------------------|------------------|-----------------------|
| Sample Name:      | zw-2-47-whale-s,s-200-1-0.5-214 | Acquired By:     | Breeze                |
| Sample Type:      | 未知                              | Date Acquired:   | 2013/9/3 15:12:23 CST |
| Val:              | 1                               | Acq Method:      | zg100                 |
| Injection #:      | 19                              | Date Processed:  | 2013/9/3 15:51:22 CST |
| Injection Volume: | 10.00 ul                        | Channel Name:    | V2489 ChA             |
| Run Time:         | 35.00 Minutes                   | Sample Set Name: |                       |

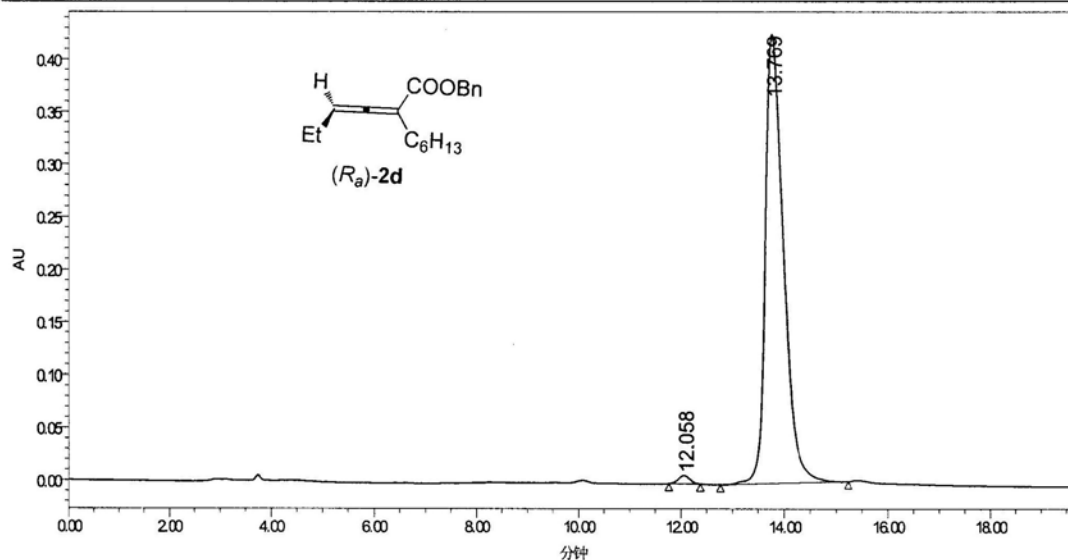

|   | RT<br>(min) | Area<br>(峰面积) | %Area | Height<br>(峰高) | %<br>Height |
|---|-------------|---------------|-------|----------------|-------------|
| 1 | 12.058      | 125130        | 1.20  | 8004           | 1.84        |
| 2 | 13.760      | 10323491      | 98.80 | 426883         | 98.16       |

## SAMPLE INFORMATION

Sample Name: zwf-2-5-whetk-s-200-1-0.5-214  
Sample Type: 未知  
Val: 1  
Injection #: 16  
Injection Volume: 10.00  $\mu$ l  
Run Time: 35.00 Minutes

Acquired By: Breeze  
Date Acquired: 2013/9/3 14:27:39 CST  
Acq. Method: zig100  
Date Processed: 2013/9/3 15:52:21 CST  
Channel Name: V2489 ChA  
Sample Set Name:

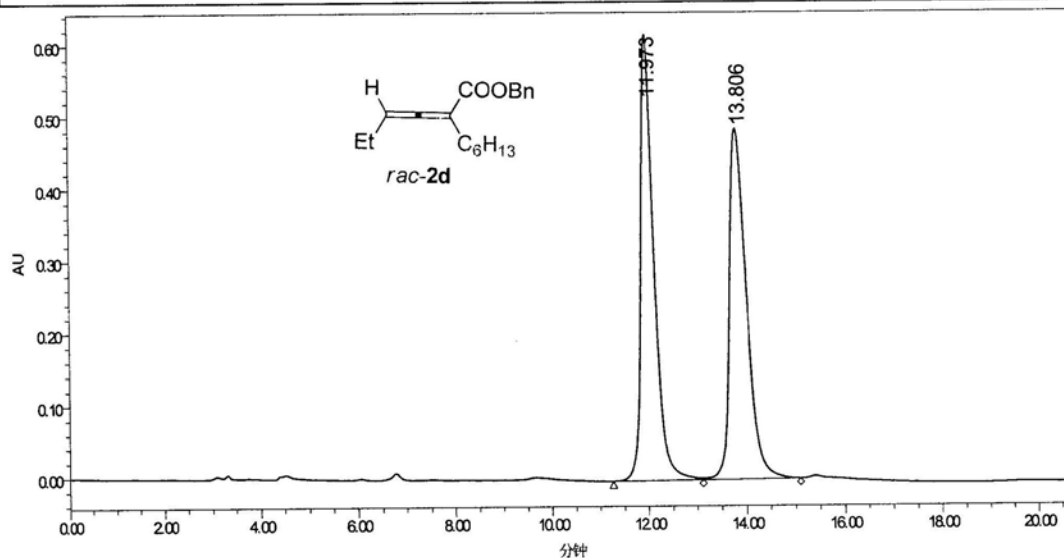

|   | RT<br>(min) | Area<br>(峰面积) | %Area | Height<br>(峰高) | %<br>Height |
|---|-------------|---------------|-------|----------------|-------------|
| 1 | 11.973      | 1195267       | 50.31 | 620860         | 56.04       |
| 2 | 13.806      | 1180306       | 49.69 | 486963         | 43.96       |

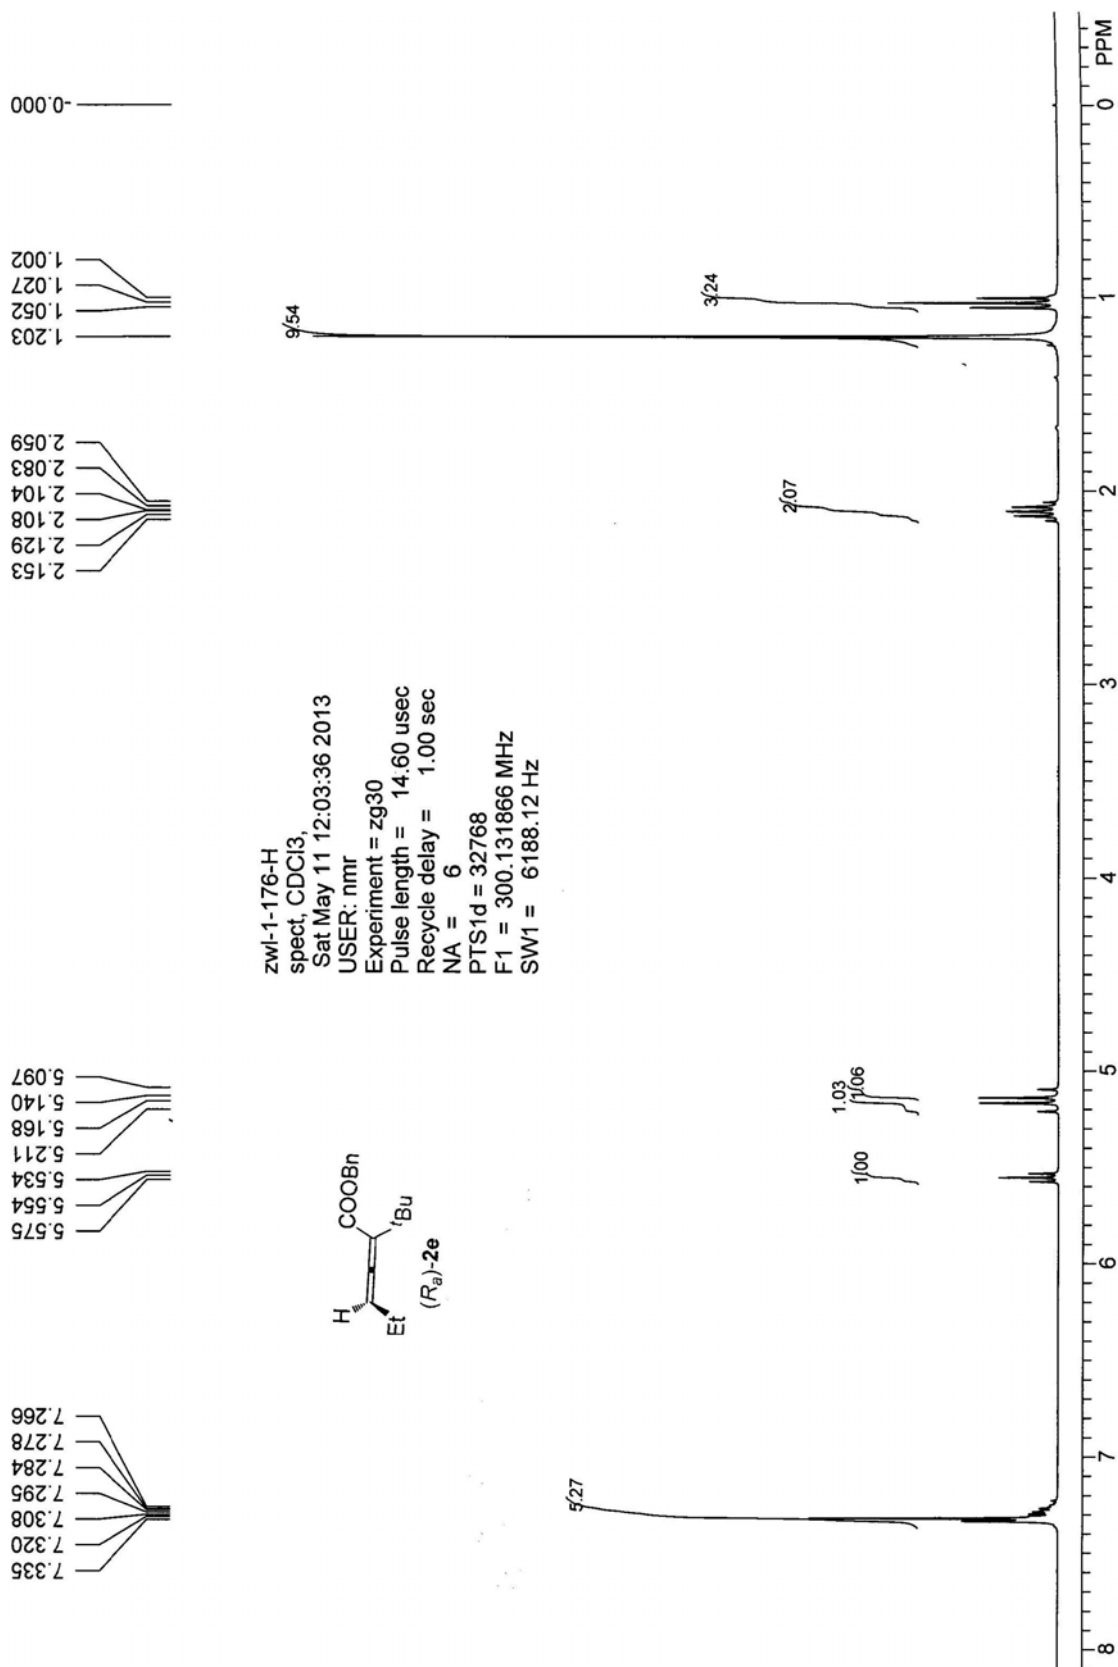

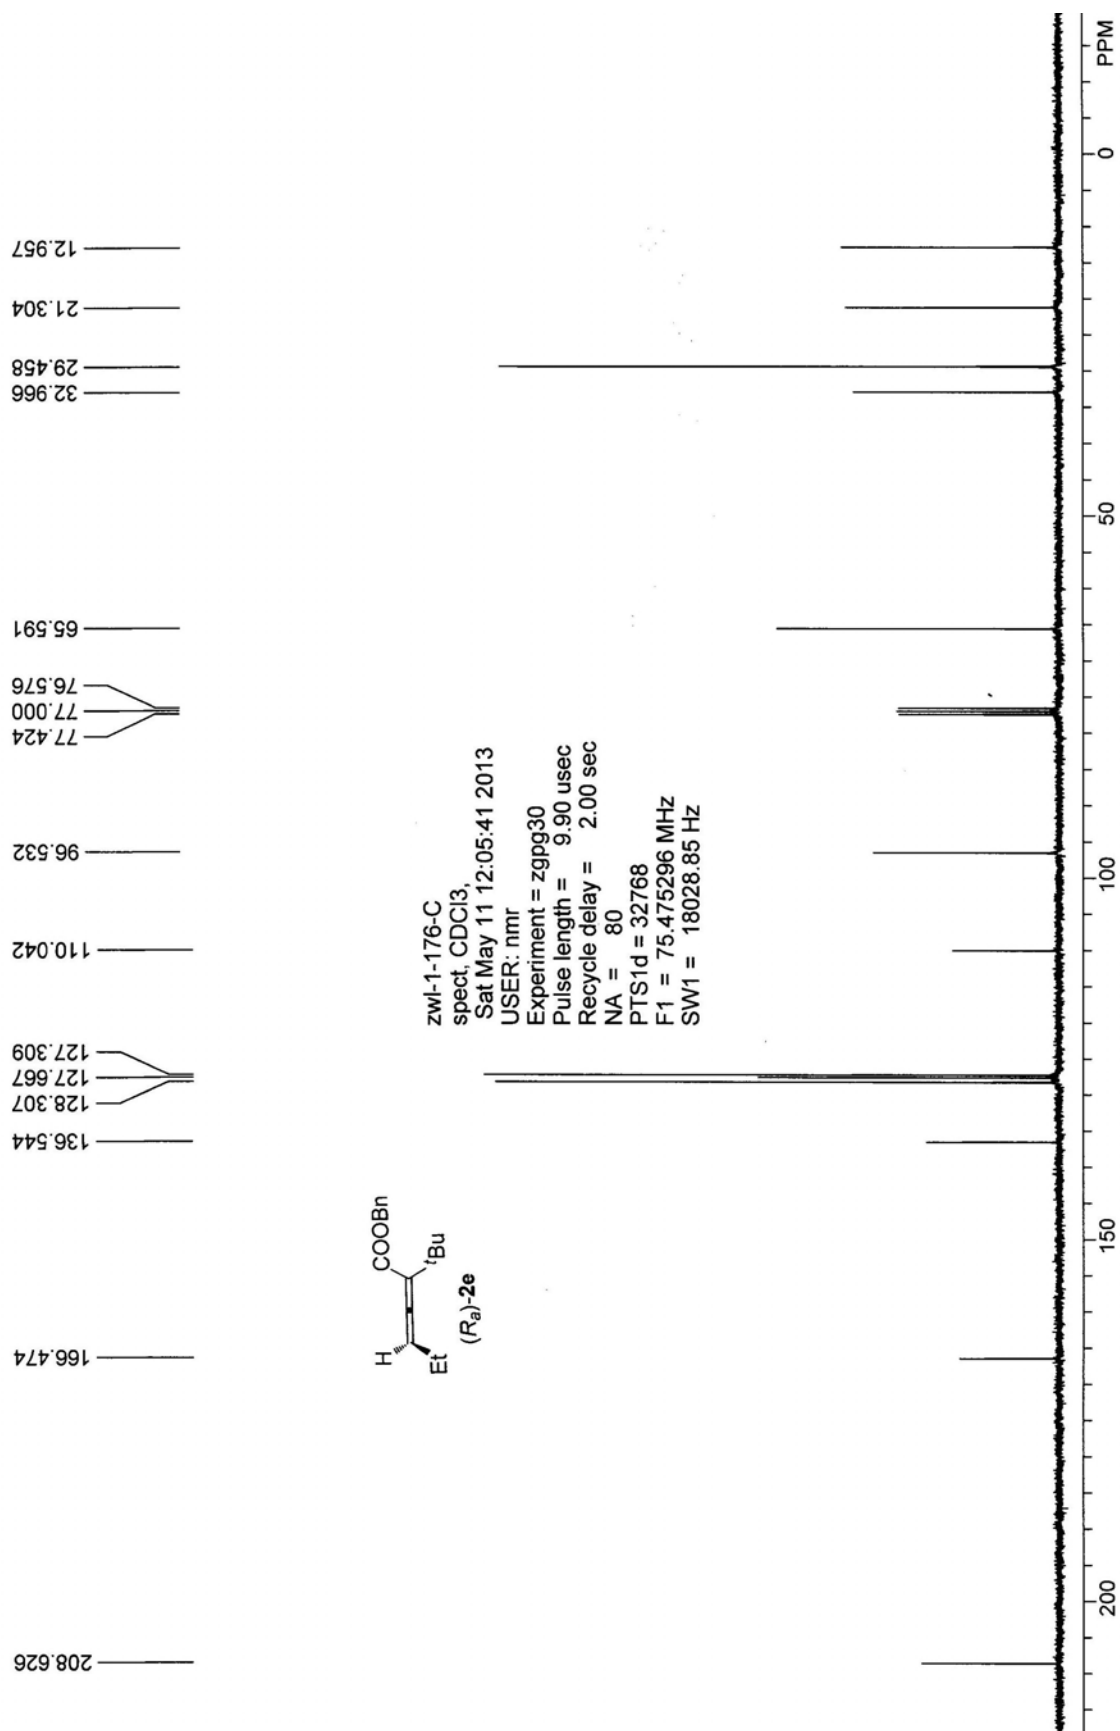

# zwl-1-176-whelk-s, s-200-1-0.3-214

实验时间: 2013-05-15, 9:40:01

报告时间: 2013-05-15, 16:31:07

谱图文件: D:\zhuguangjiong\zwl\20130515\ZWL-1-176-WHELK-S, S-200-1-0.3-214.org

实验内容简介:  
whelk-s, s 200+1  
0.3ml/min 214nm

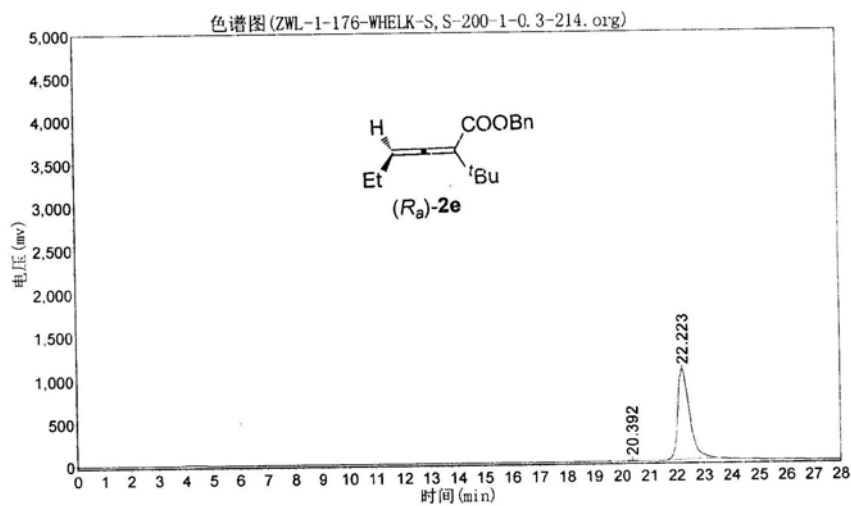

分析结果表

| 峰号 | 峰名 | 保留时间   | 峰高          | 峰面积          | 含量       |
|----|----|--------|-------------|--------------|----------|
| 1  |    | 20.392 | 8943.304    | 230134.391   | 0.7233   |
| 2  |    | 22.223 | 1052257.500 | 31587076.000 | 99.2767  |
| 总计 |    |        | 1061200.804 | 31817210.391 | 100.0000 |

# zwl-1-155-whelk-s, s-200-1-0.3-214

实验时间: 2013-05-15, 9:02:14

报告时间: 2013-05-15, 16:29:23

谱图文件: D:\zhuguangjiong\zwl\20130515\ZWL-1-155-WHELK-S, S-200-1-0.3-214.org

实验内容简介:  
whelk-s, s 200+1  
0.3ml/min 214nm

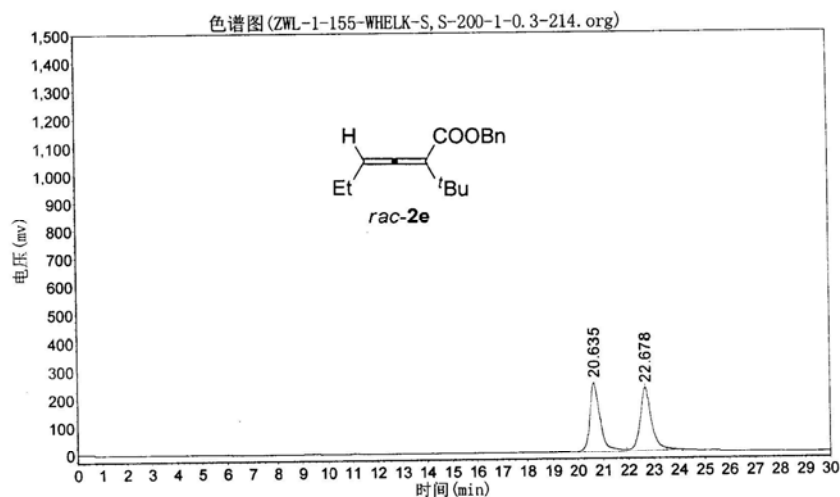

分析结果表

| 峰号 | 峰名 | 保留时间   | 峰高         | 峰面积          | 含量       |
|----|----|--------|------------|--------------|----------|
| 1  |    | 20.635 | 247871.281 | 7089518.000  | 50.0137  |
| 2  |    | 22.678 | 227785.813 | 7085625.000  | 49.9863  |
| 总计 |    |        | 475657.094 | 14175143.000 | 100.0000 |



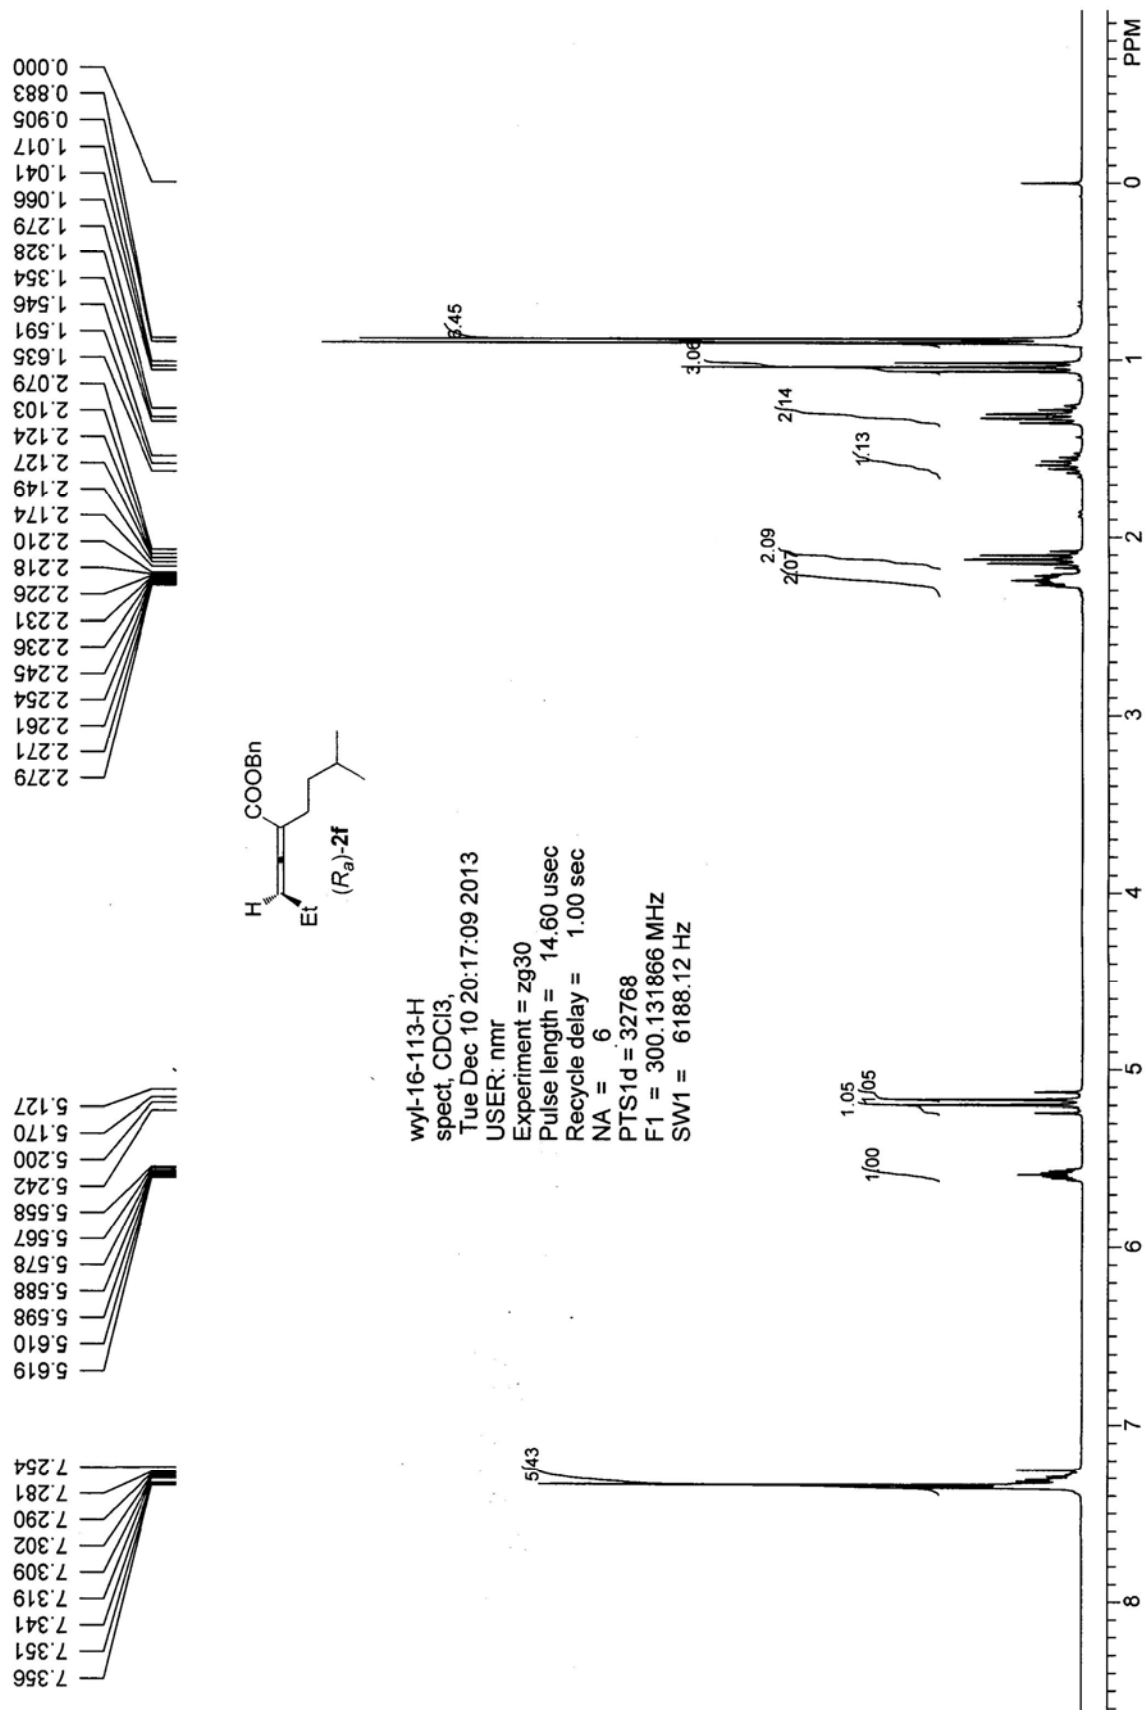

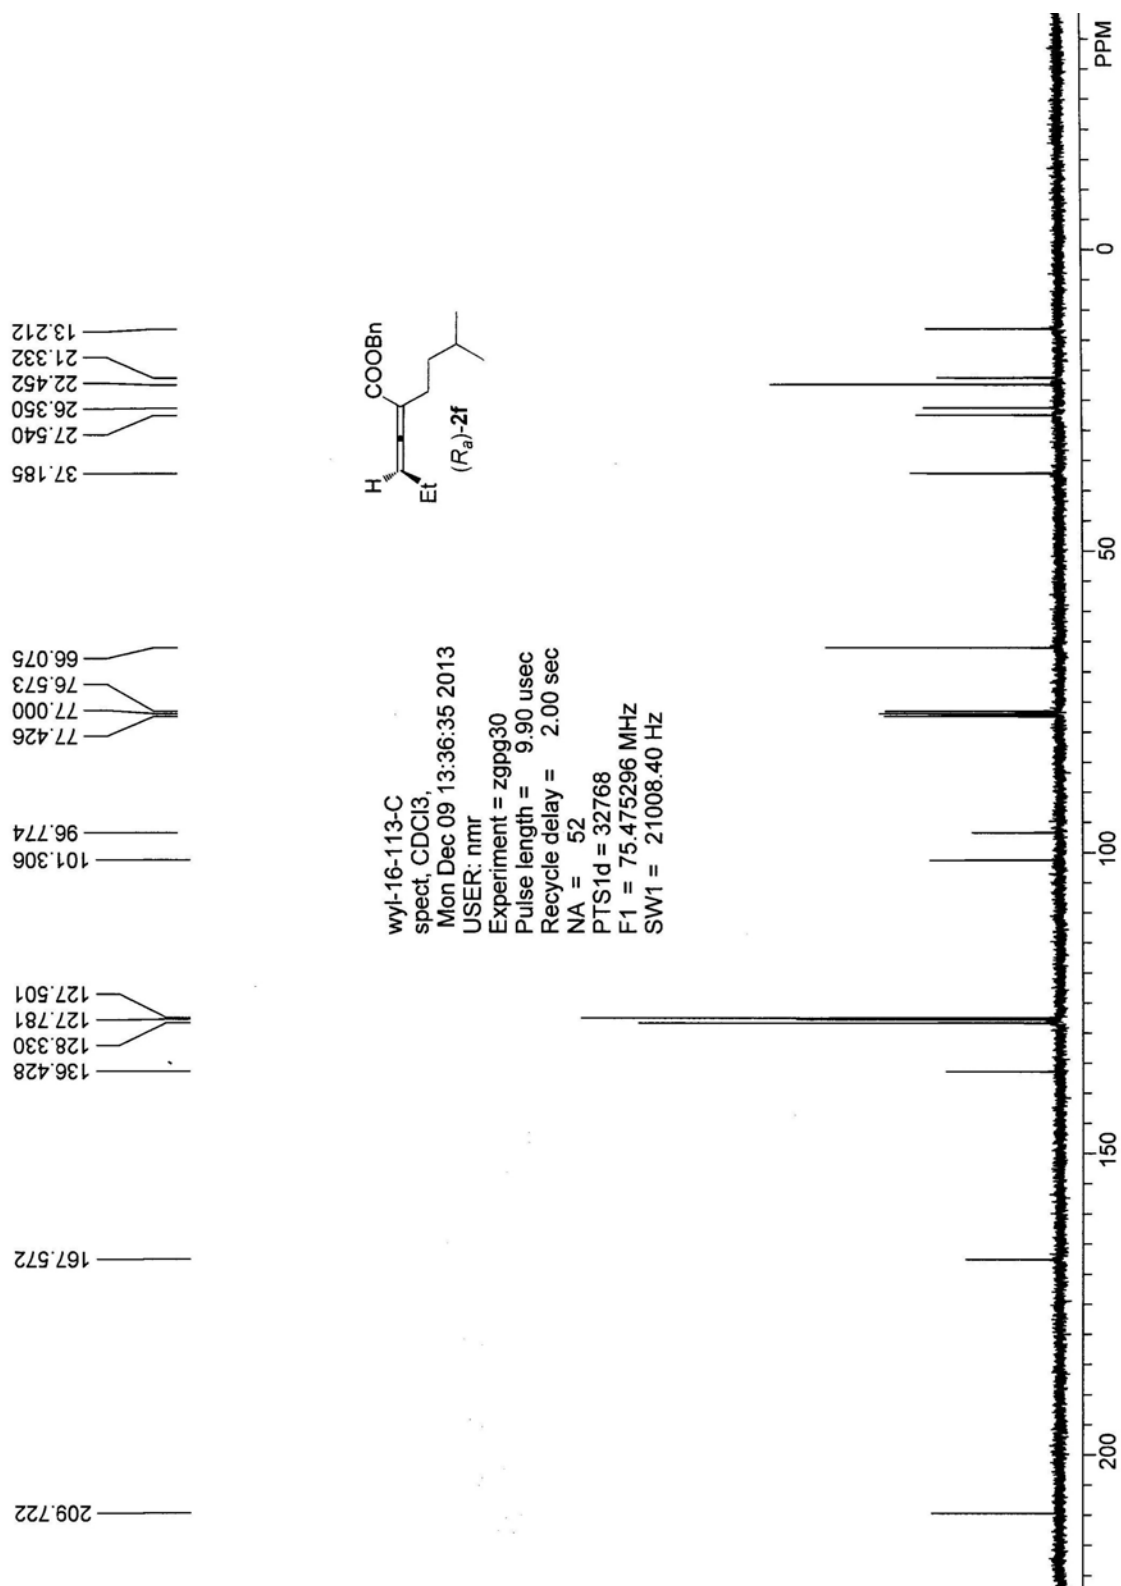

# wyl-16-113-wheelk-s, s-300-1-0.7-214

实验时间: 2013-06-13, 15:48:06

报告时间: 2013-06-13, 16:47:35

谱图文件: D:\zhuguangjiong\wyl\20130613\wyl-16-113-wheelk-s, s-300-1-0.7-214..org

实验内容简介:  
wheelk-s, s 300+1  
0.7ml/min 214nm

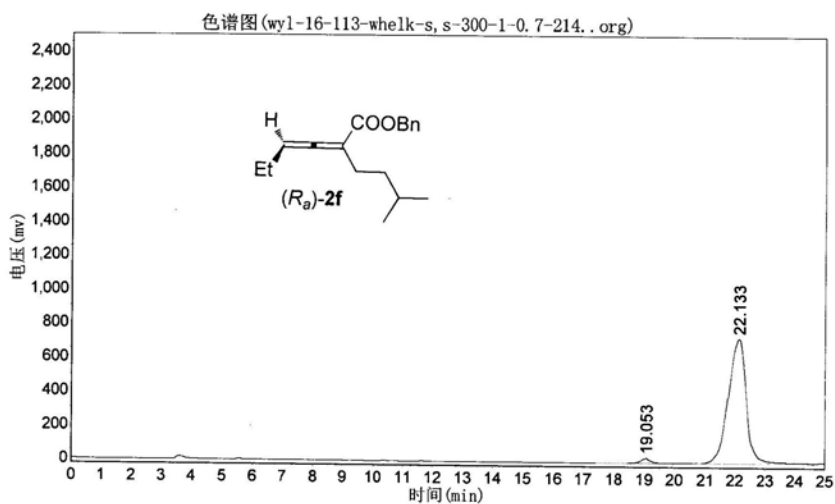

分析结果表

| 峰号 | 峰名 | 保留时间   | 峰高         | 峰面积          | 含量       |
|----|----|--------|------------|--------------|----------|
| 1  |    | 19.053 | 24829.750  | 618617.000   | 1.9914   |
| 2  |    | 22.133 | 729771.188 | 30445266.000 | 98.0086  |
| 总计 |    |        | 754600.938 | 31063883.000 | 100.0000 |

# wyl-16-118-whelk-s, s-300-1-0.7-214

实验时间: 2013-06-13, 15:20:35

报告时间: 2013-06-13, 16:45:34

谱图文件: D:\zhuguangjiong\wyl\20130613\wyl-16-118-whelk-s, s-300-1-0.7-214. .org

实验内容简介:  
whelk-s, s 300+1  
0.7ml/min 214nm

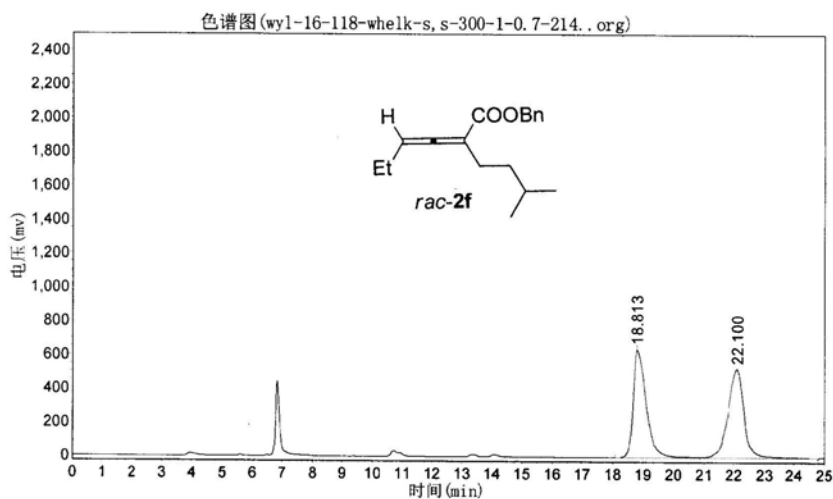

分析结果表

| 峰号 | 峰名 | 保留时间   | 峰高          | 峰面积          | 含量       |
|----|----|--------|-------------|--------------|----------|
| 1  |    | 18.813 | 641433.000  | 19134010.000 | 49.5780  |
| 2  |    | 22.100 | 524517.750  | 19459710.000 | 50.4220  |
| 总计 |    |        | 1165950.750 | 38593720.000 | 100.0000 |

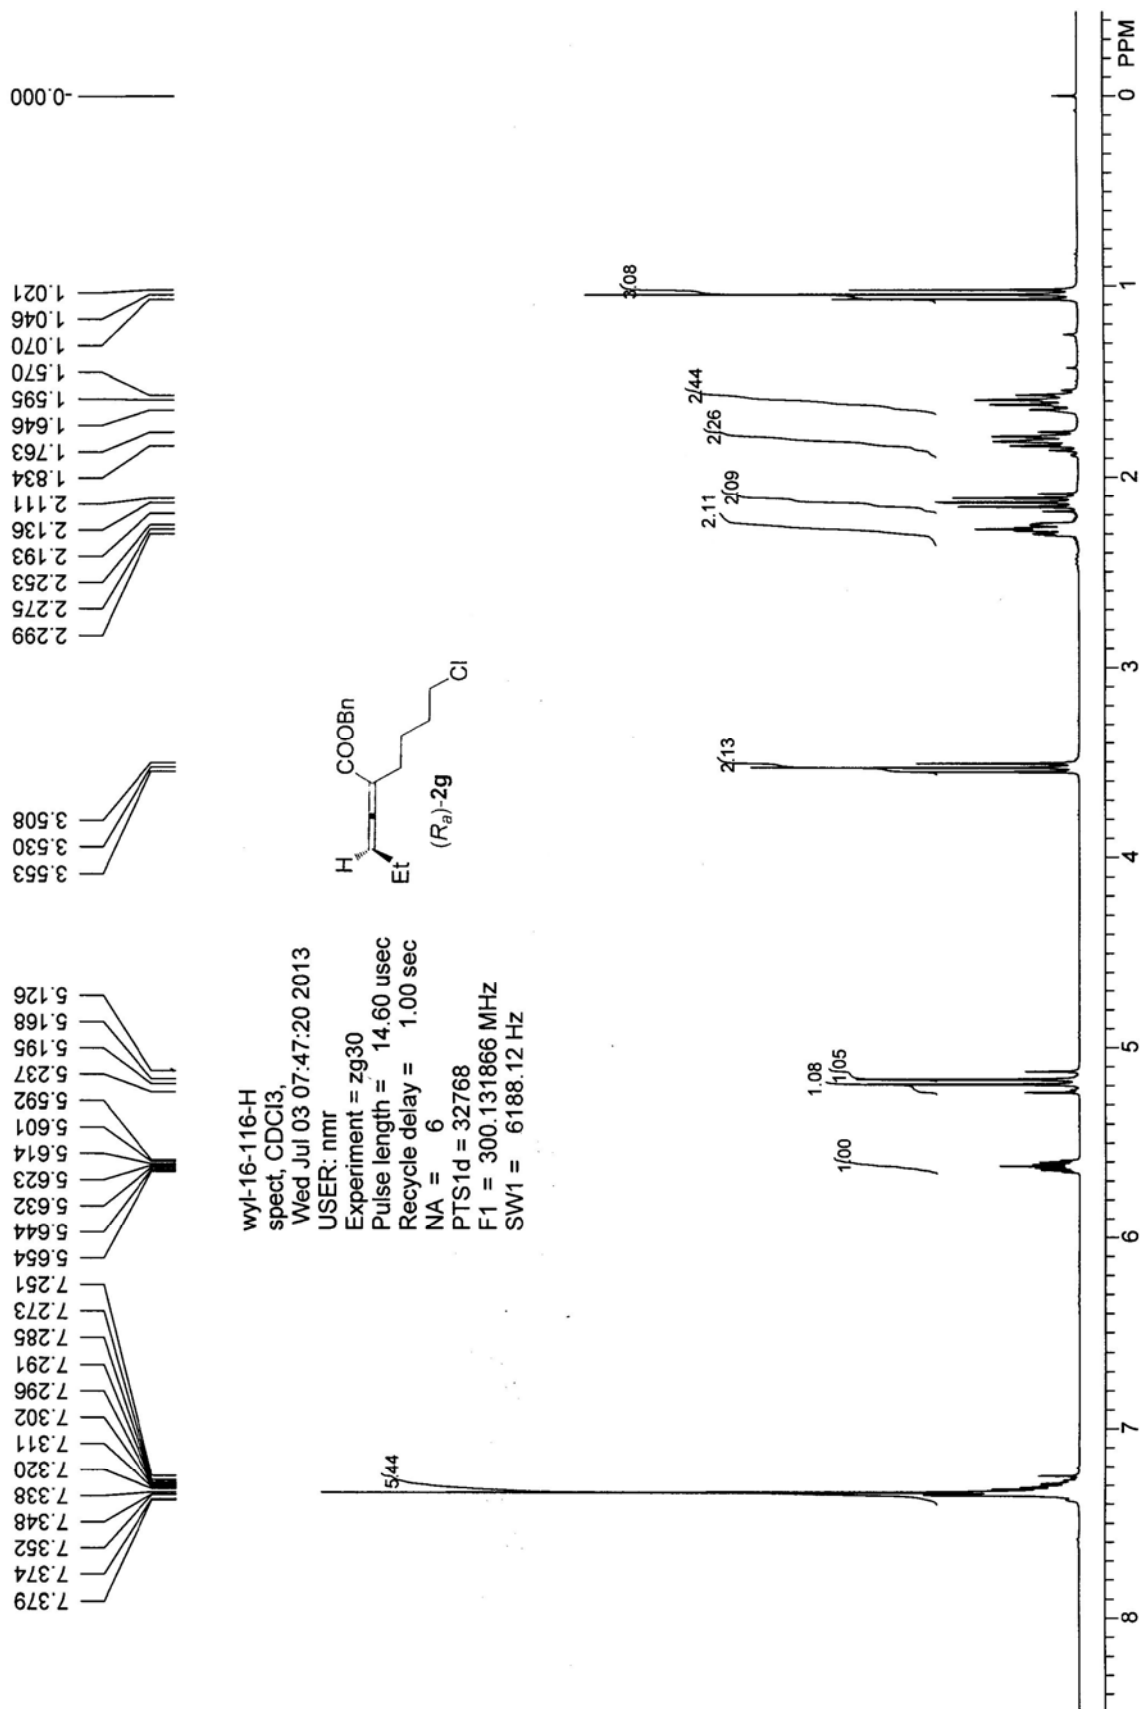

wyl-16-116-H  
spect, CDCl<sub>3</sub>,  
Wed Jul 03 07:47:20 2013  
USER: nmr  
Experiment = zg30  
Pulse length = 14.60 usec  
Recycle delay = 1.00 sec  
NA = 6  
PTS1d = 32768  
F1 = 300.131866 MHz  
SW1 = 6188.12 Hz

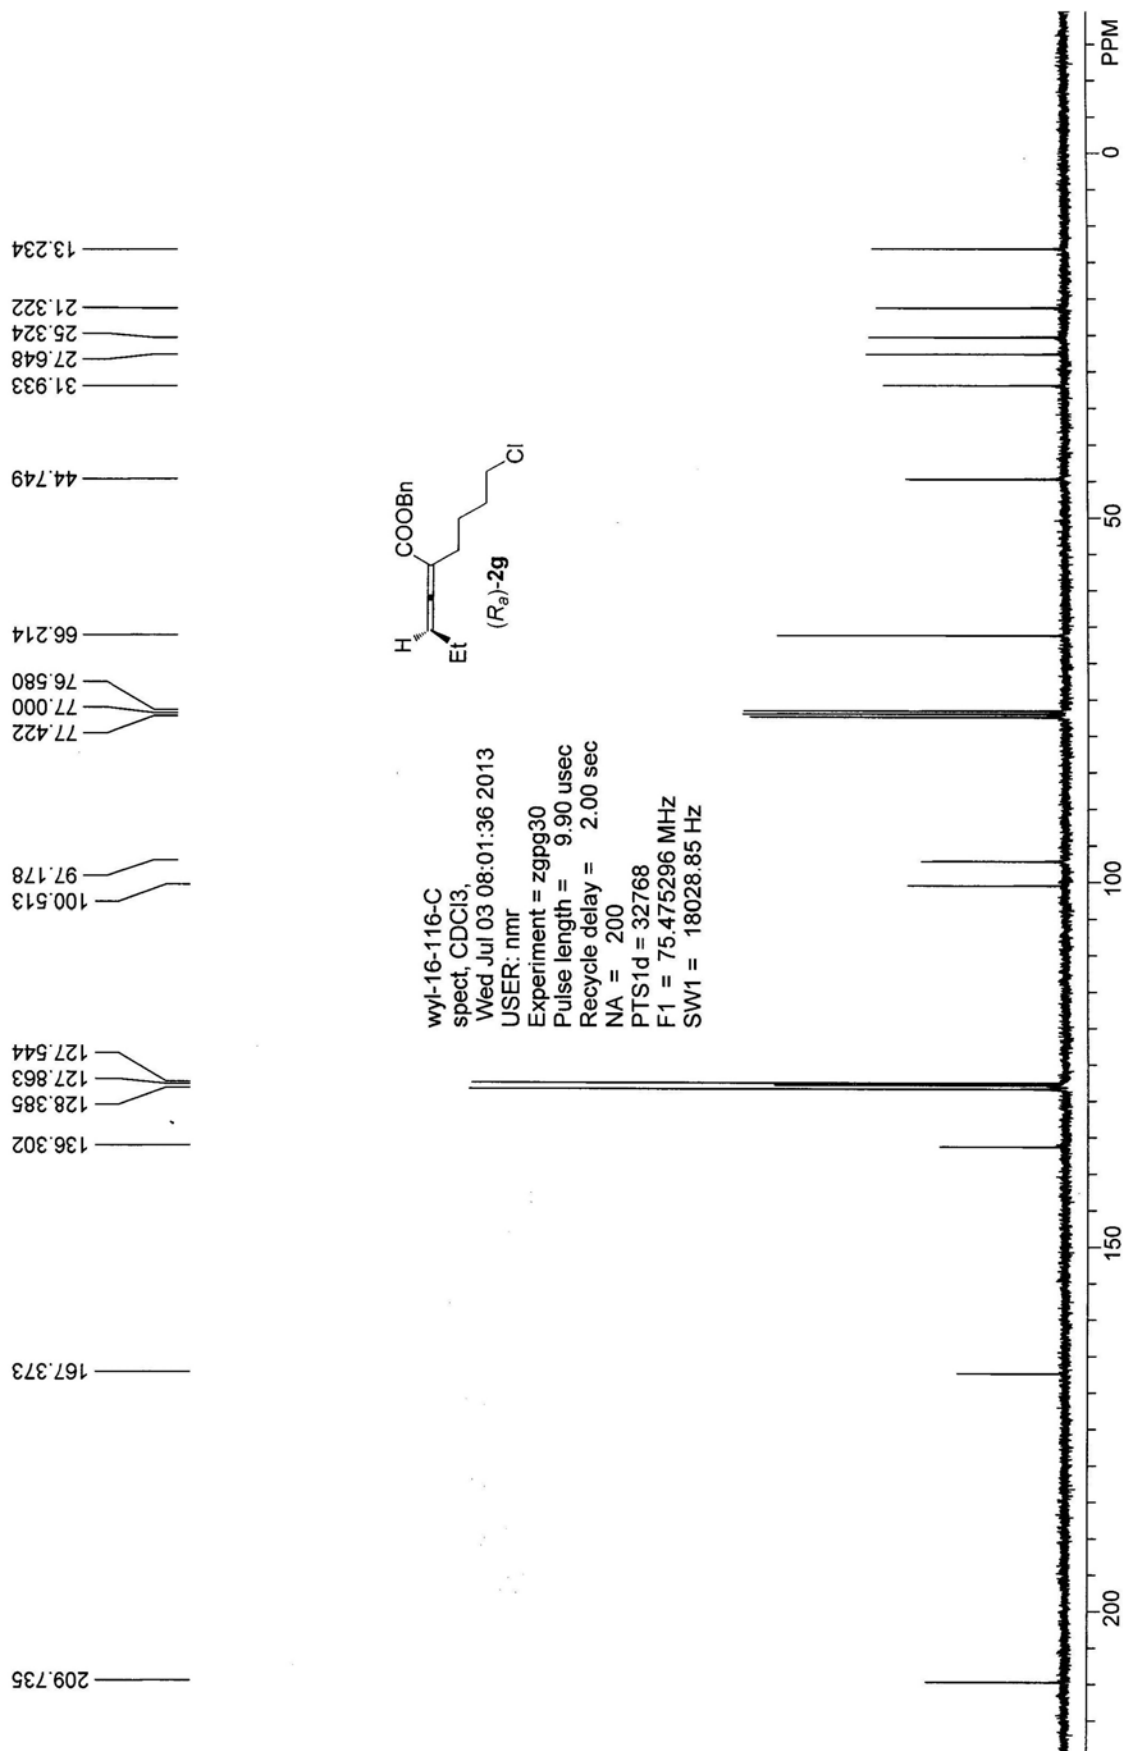

## SAMPLE INFORMATION

|                   |                                   |                  |                        |
|-------------------|-----------------------------------|------------------|------------------------|
| Sample Name:      | wyl-16-116-whalek.s.s-200-1-1-214 | Acquired By:     | Breeze                 |
| Sample Type:      | 未知                                | Date Acquired:   | 2013/6/14 13:57:40 CST |
| Vial:             | 1                                 | Acq. Method:     | zgj100                 |
| Injection #:      | 19                                | Date Processed:  | 2013/6/14 17:18:39 CST |
| Injection Volume: | 10.00 ul                          | Channel Name:    | V2489 ChA              |
| Run Time:         | 200.00 Minutes                    | Channel Desc.:   | V2489 ChA.214nm        |
| Column Type:      |                                   | Sample Set Name: |                        |

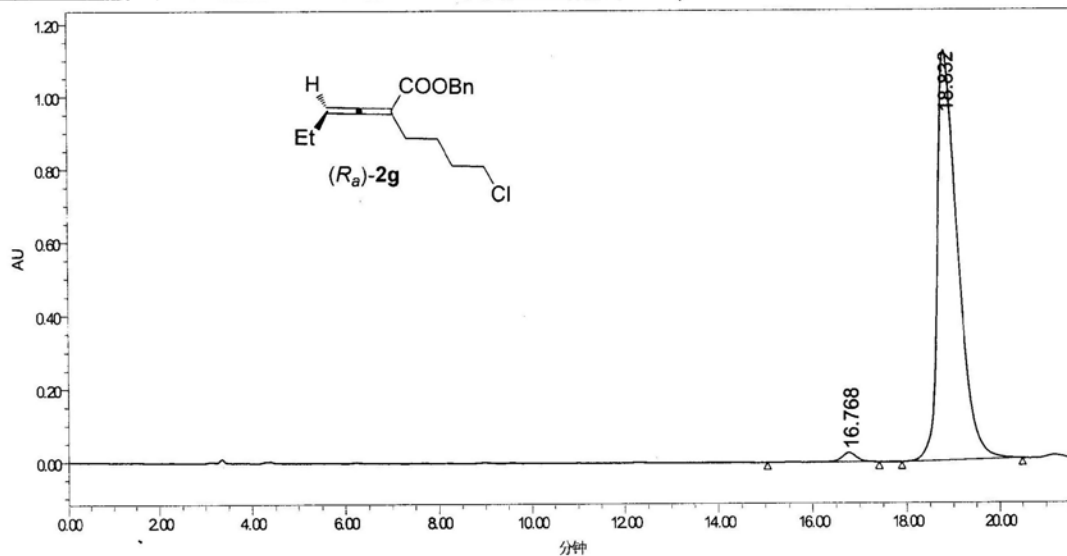

|   | RT<br>(min) | Area<br>(峰面积) | %Area | Height<br>(峰高) | %<br>Height |
|---|-------------|---------------|-------|----------------|-------------|
| 1 | 16.768      | 599057        | 1.74  | 25980          | 2.26        |
| 2 | 18.832      | 33922444      | 98.26 | 1123185        | 97.74       |

## SAMPLE INFORMATION

|                   |                                |                  |                        |
|-------------------|--------------------------------|------------------|------------------------|
| Sample Name:      | zwf-2-11-whale-s-s-200-1-1-214 | Acquired By:     | Breeze                 |
| Sample Type:      | 未知                             | Date Acquired:   | 2013/6/14 10:26:52 CST |
| Vial:             | 1                              | Acq. Method:     | zg100                  |
| Injection #:      | 15                             | Date Processed:  | 2013/6/14 17:18:20 CST |
| Injection Volume: | 10.00 uL                       | Channel Name:    | V0489 ChA              |
| Run Time:         | 200.00 Minutes                 | Channel Desc.:   | V0489 ChA.214nm        |
| Column Type:      |                                | Sample Set Name: |                        |

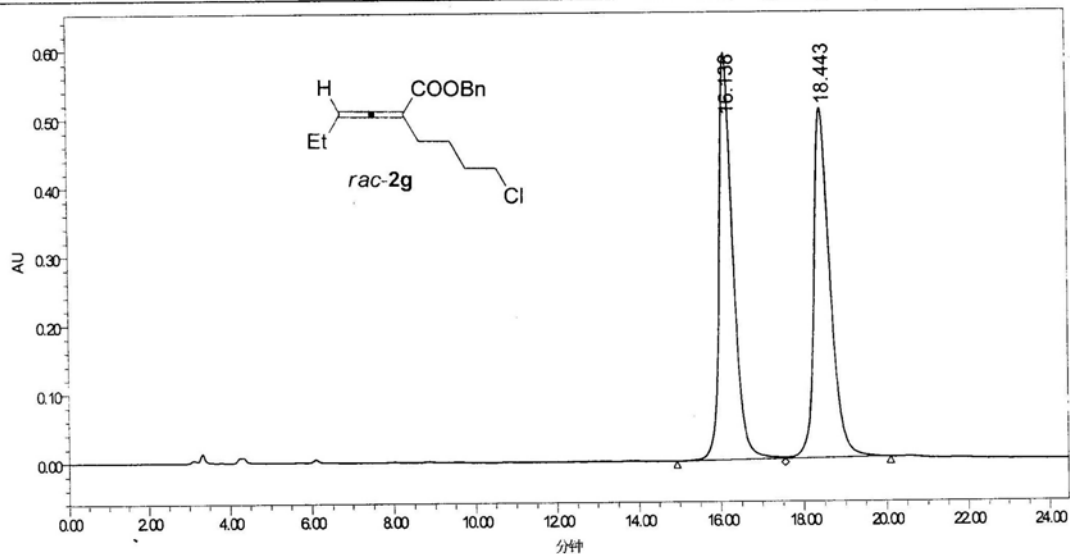

|   | RT<br>(min) | Area<br>(msec) | %Area | Height<br>(msec) | %<br>Height |
|---|-------------|----------------|-------|------------------|-------------|
| 1 | 16.136      | 13694479       | 50.01 | 593010           | 53.79       |
| 2 | 18.443      | 13689914       | 49.99 | 509347           | 46.21       |



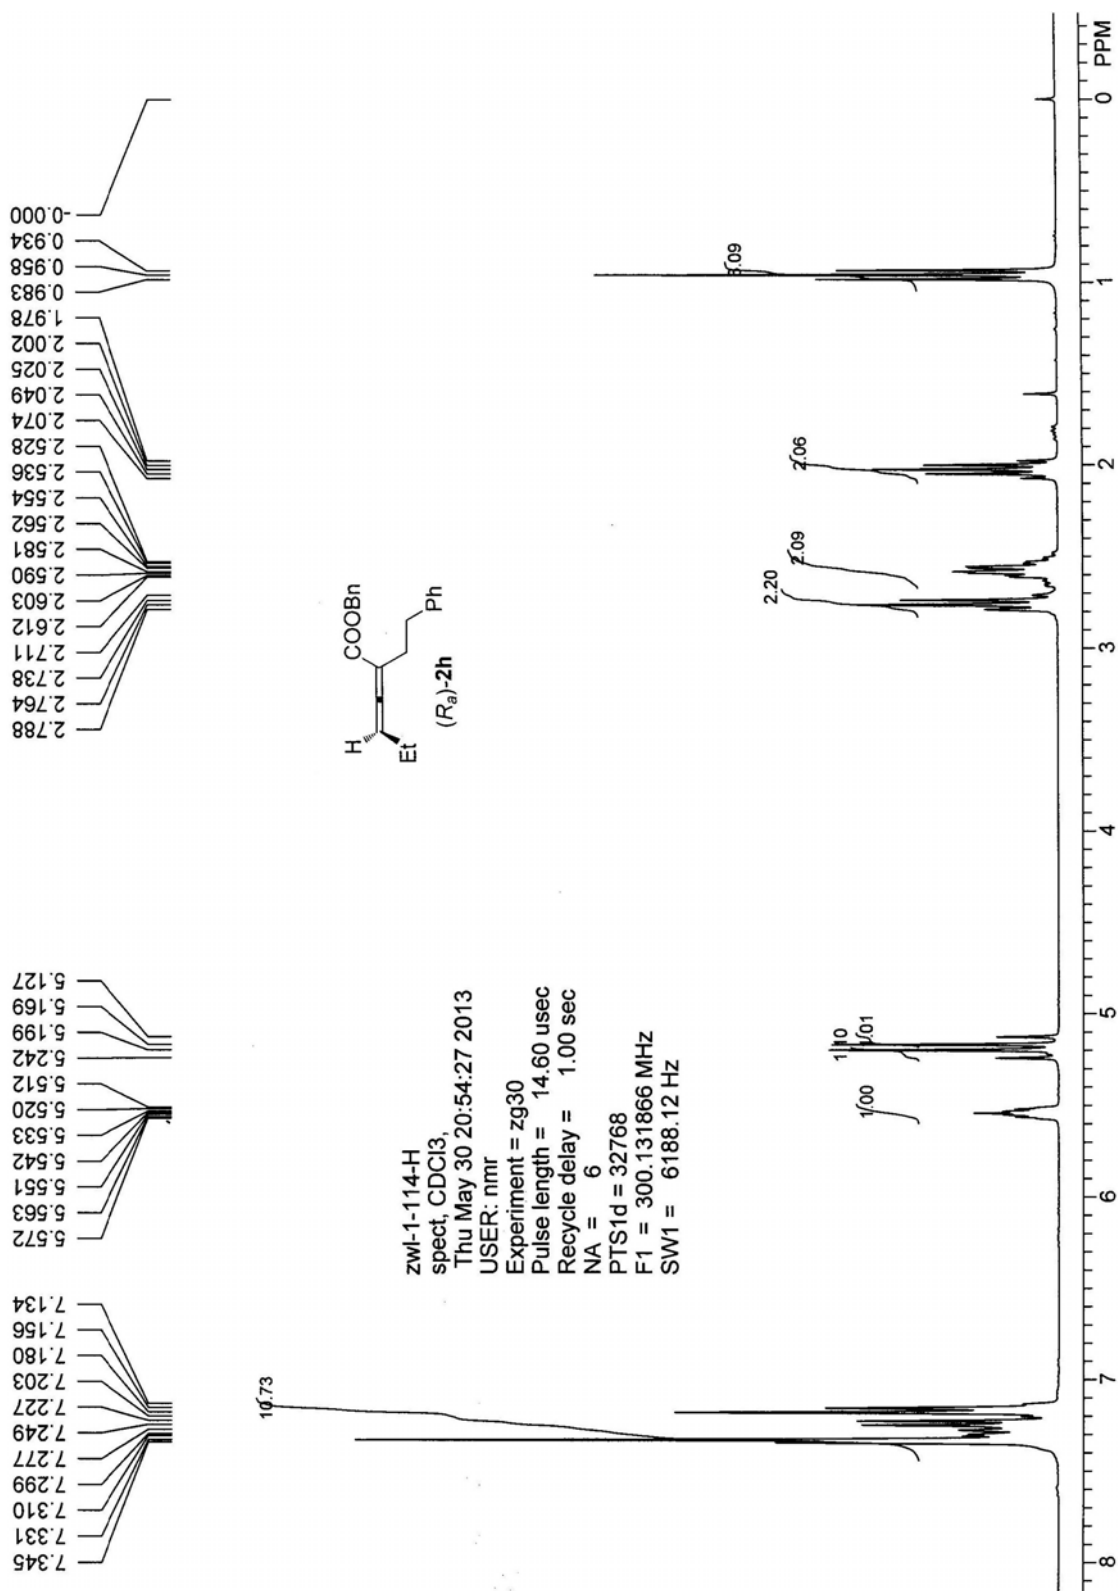

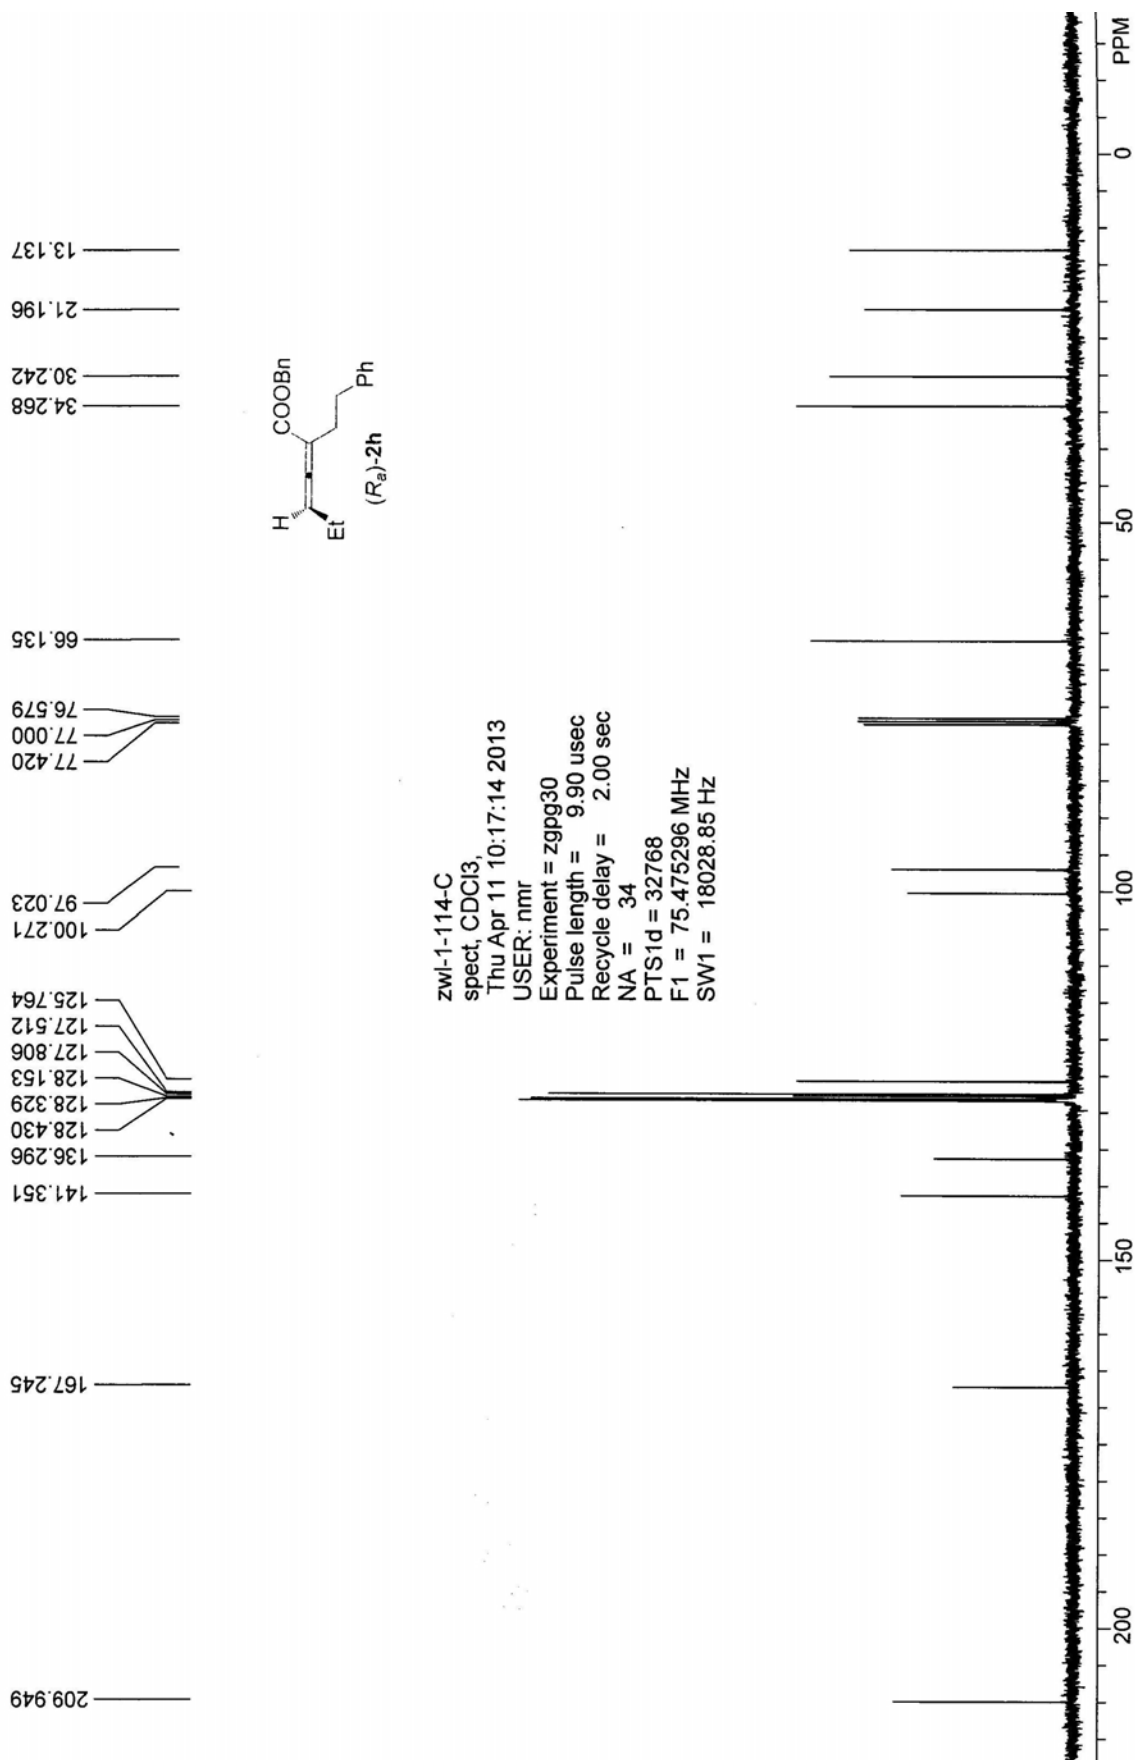

# zwl-1-114-whelk-s, s-300-1-1-214

实验时间: 2013-05-10, 12:12:00

报告时间: 2013-05-10, 12:47:58

谱图文件:D:\zhuguangjiong\zwl\20130510\zwl-1-114-whelk-s, s-300-1-1-214. org

实验内容简介:  
whelk-s, s 300+1  
1ml/min 214nm

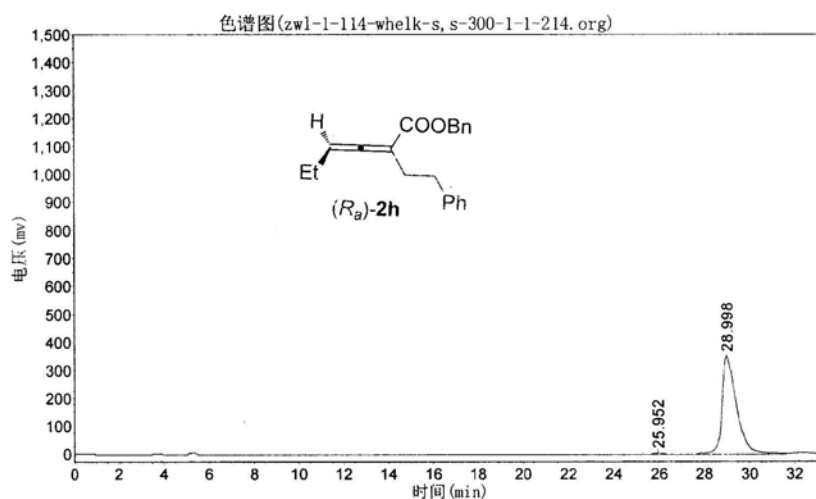

分析结果表

| 峰号 | 峰名 | 保留时间   | 峰高         | 峰面积          | 含量       |
|----|----|--------|------------|--------------|----------|
| 1  |    | 25.952 | 4517.988   | 149698.406   | 0.9257   |
| 2  |    | 28.998 | 351228.844 | 16021067.000 | 99.0743  |
| 总计 |    |        | 355746.832 | 16170765.406 | 100.0000 |

# zwl-1-119-whelk-s, s-300-1-1-214

实验时间: 2013-05-10, 11:32:44

报告时间: 2013-05-10, 12:46:52

谱图文件: D:\zhuguangjiong\zwl\20130510\zwl-1-119-whelk-s, s-300-1-1-214.org

实验内容简介:  
whelk-s, s 300+1  
1ml/min 214nm

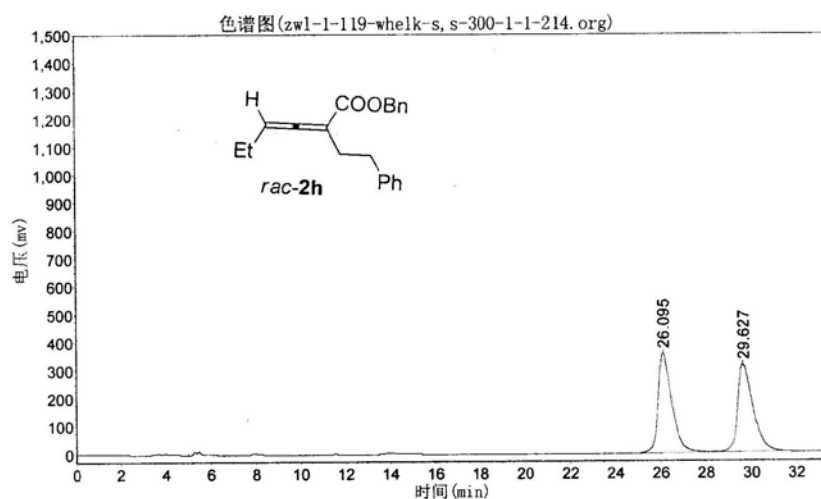

分析结果表

| 峰号 | 峰名 | 保留时间   | 峰高         | 峰面积          | 含量       |
|----|----|--------|------------|--------------|----------|
| 1  |    | 26.095 | 357798.969 | 15080448.000 | 50.2131  |
| 2  |    | 29.627 | 315047.281 | 14952478.000 | 49.7869  |
| 总计 |    |        | 672846.250 | 30032926.000 | 100.0000 |

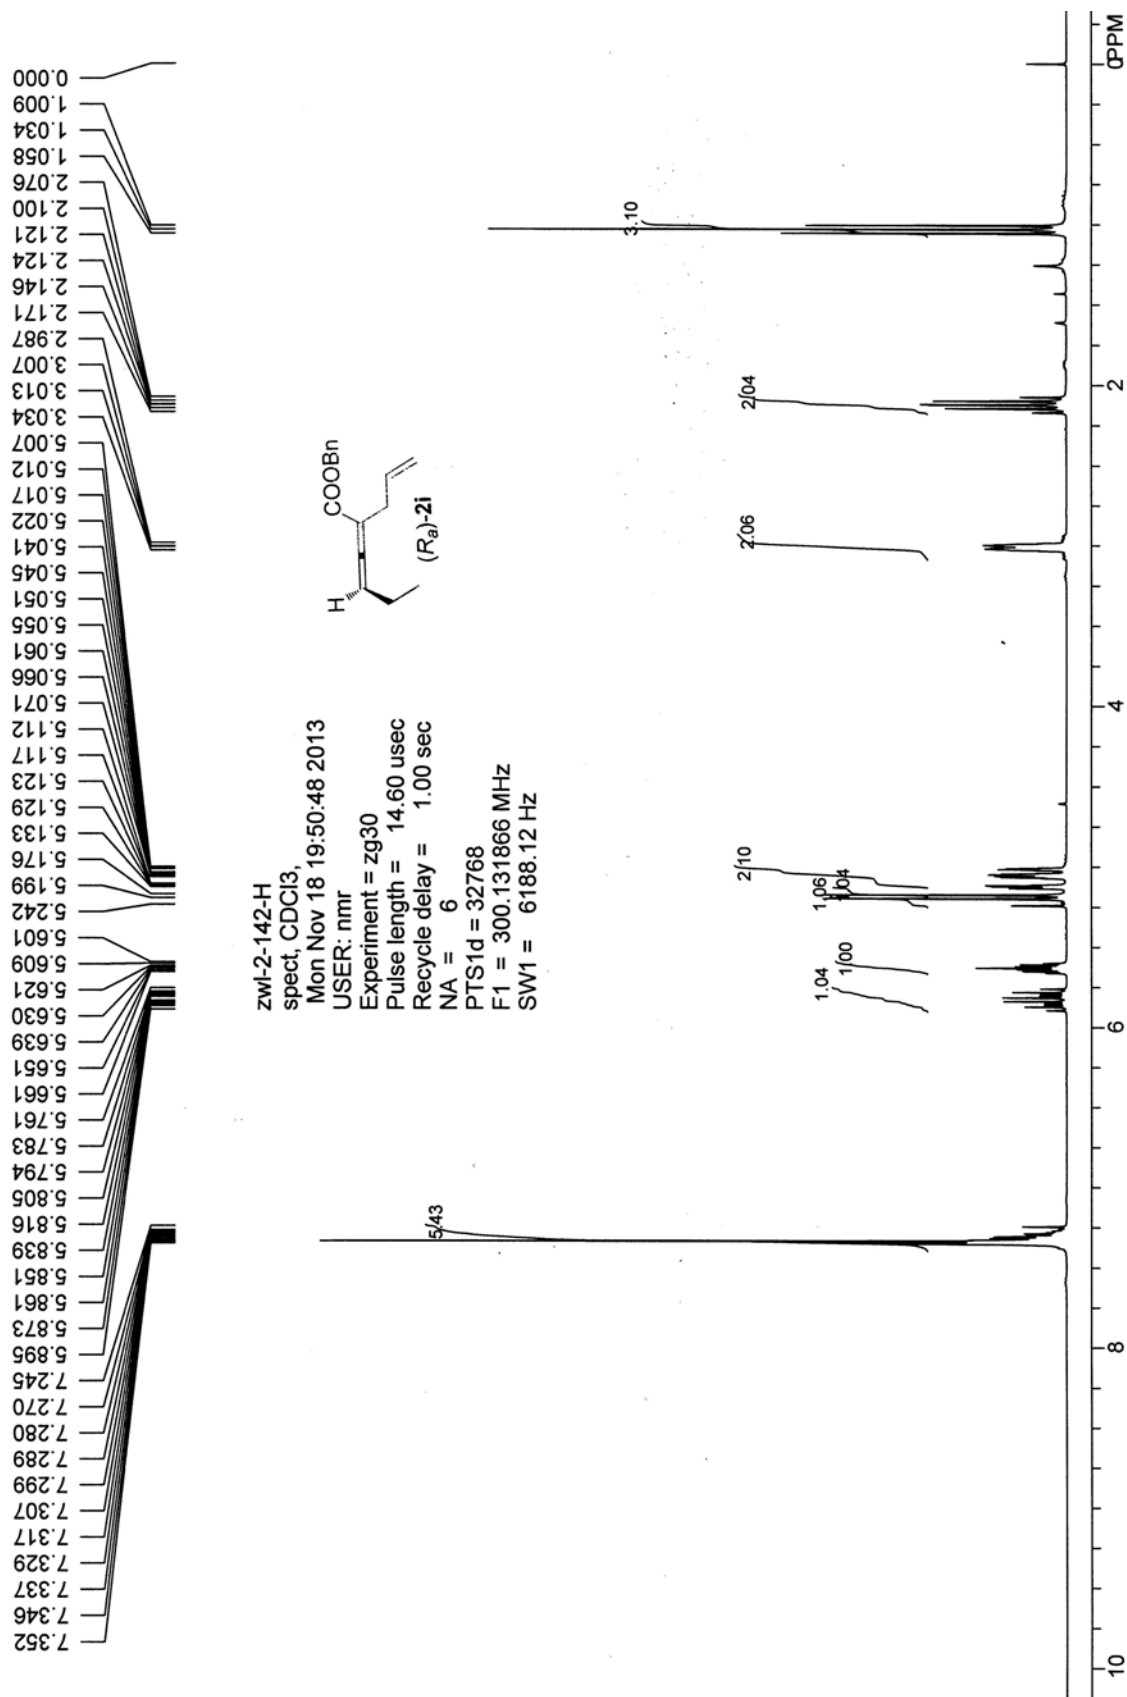

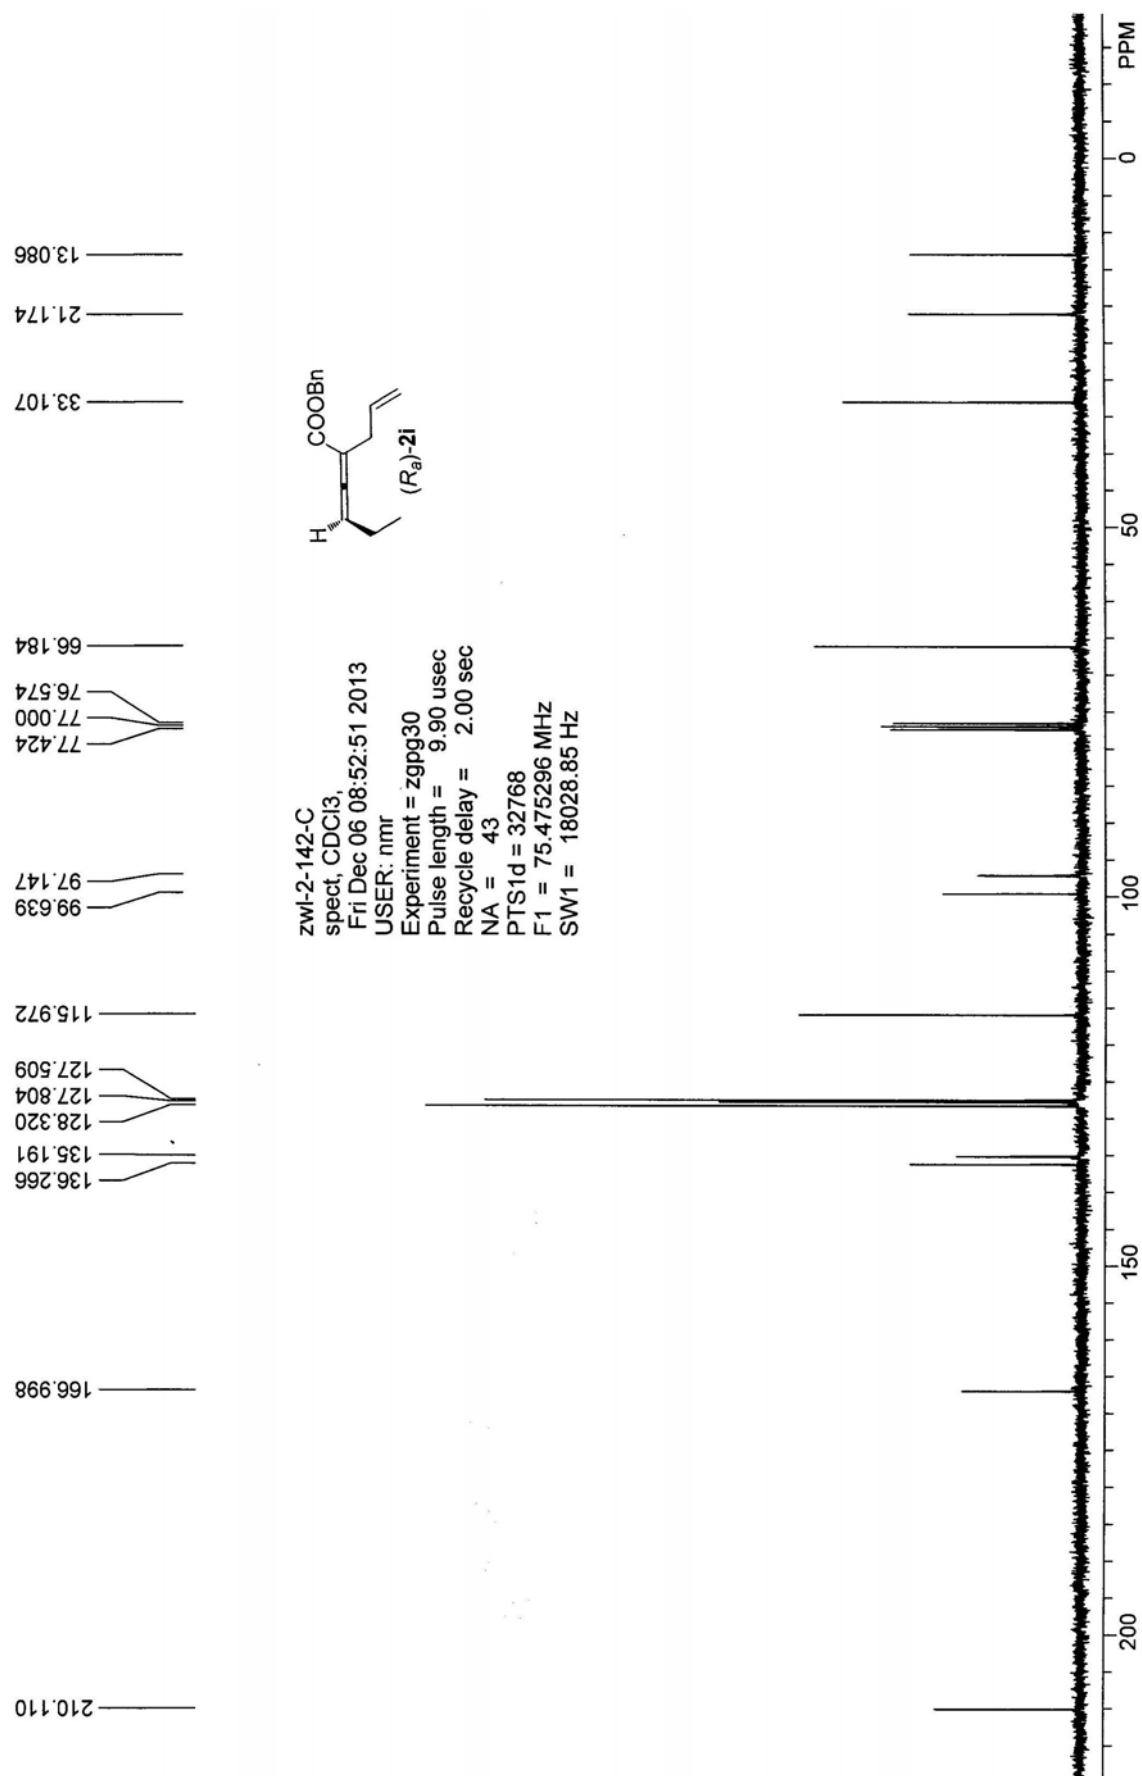

# zw1-2-142-wheelk-s, s-200-1-1-214

实验时间: 2013-11-14, 14:43:41

报告时间: 2013-11-14, 15:47:01

谱图文件: D:\zhuguangjiong\zw1\20131114\zw1-2-142-wheelk-s, s-200-1-1-214.org

实验内容简介:

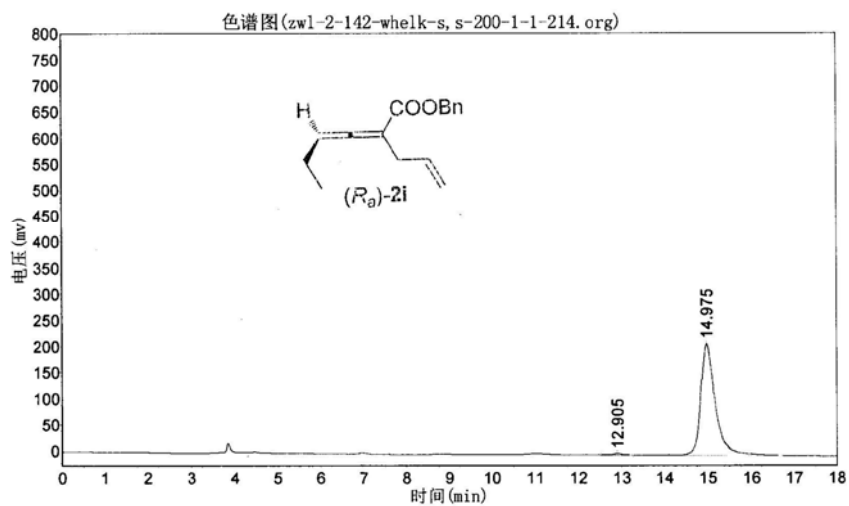

分析结果表

| 峰号 | 峰名 | 保留时间   | 峰高         | 峰面积         | 含量       |
|----|----|--------|------------|-------------|----------|
| 1  |    | 12.905 | 3443.599   | 58046.414   | 1.1443   |
| 2  |    | 14.975 | 213389.750 | 5014817.500 | 98.8557  |
| 总计 |    |        | 216833.349 | 5072863.914 | 100.0000 |

# zw1-16-143-whelk-s, s-200-1-1-214

实验时间: 2013-11-14, 13:59:37

报告时间: 2013-11-14, 15:45:39

谱图文件:D:\zhuguangjiong\zw1\20131114\zw1-16-143-whelk-s, s-200-1-1-214.org

实验内容简介:

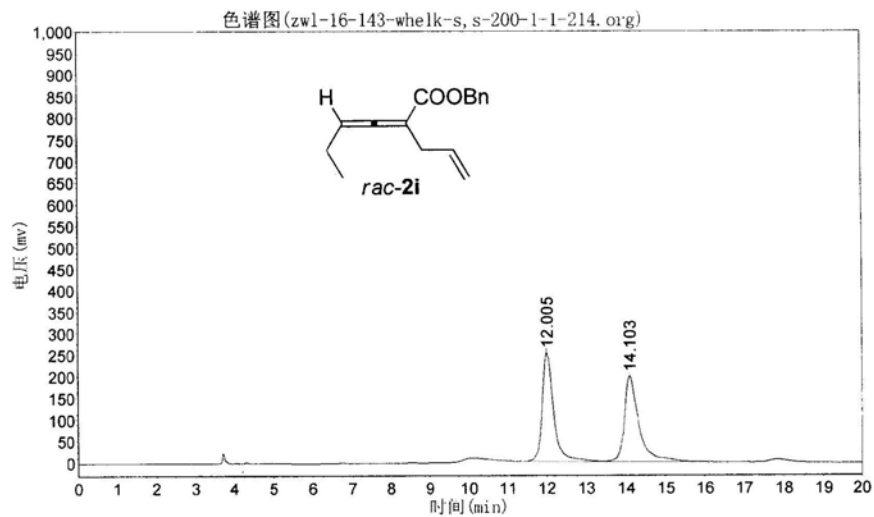

分析结果表

| 峰号 | 峰名 | 保留时间   | 峰高         | 峰面积          | 含量       |
|----|----|--------|------------|--------------|----------|
| 1  |    | 12.005 | 251432.641 | 5090092.000  | 49.7997  |
| 2  |    | 14.103 | 197256.656 | 5131036.500  | 50.2003  |
| 总计 |    |        | 448689.297 | 10221128.500 | 100.0000 |



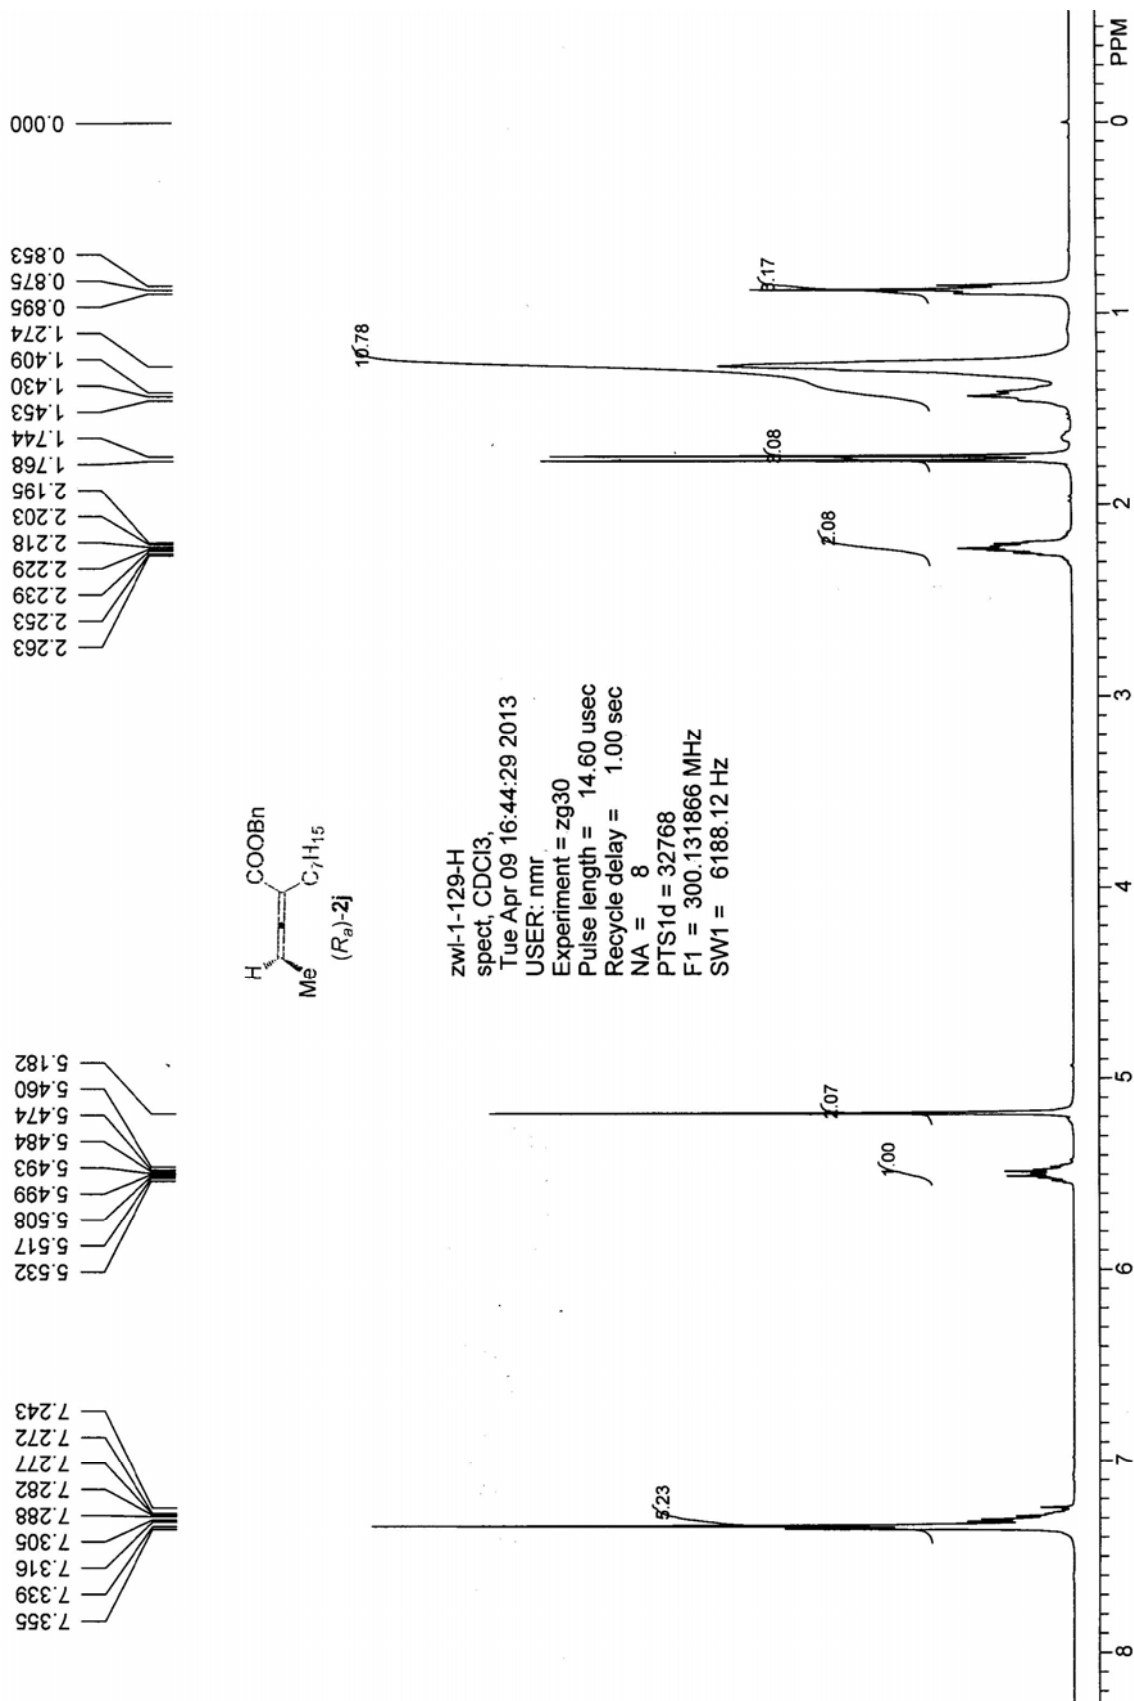

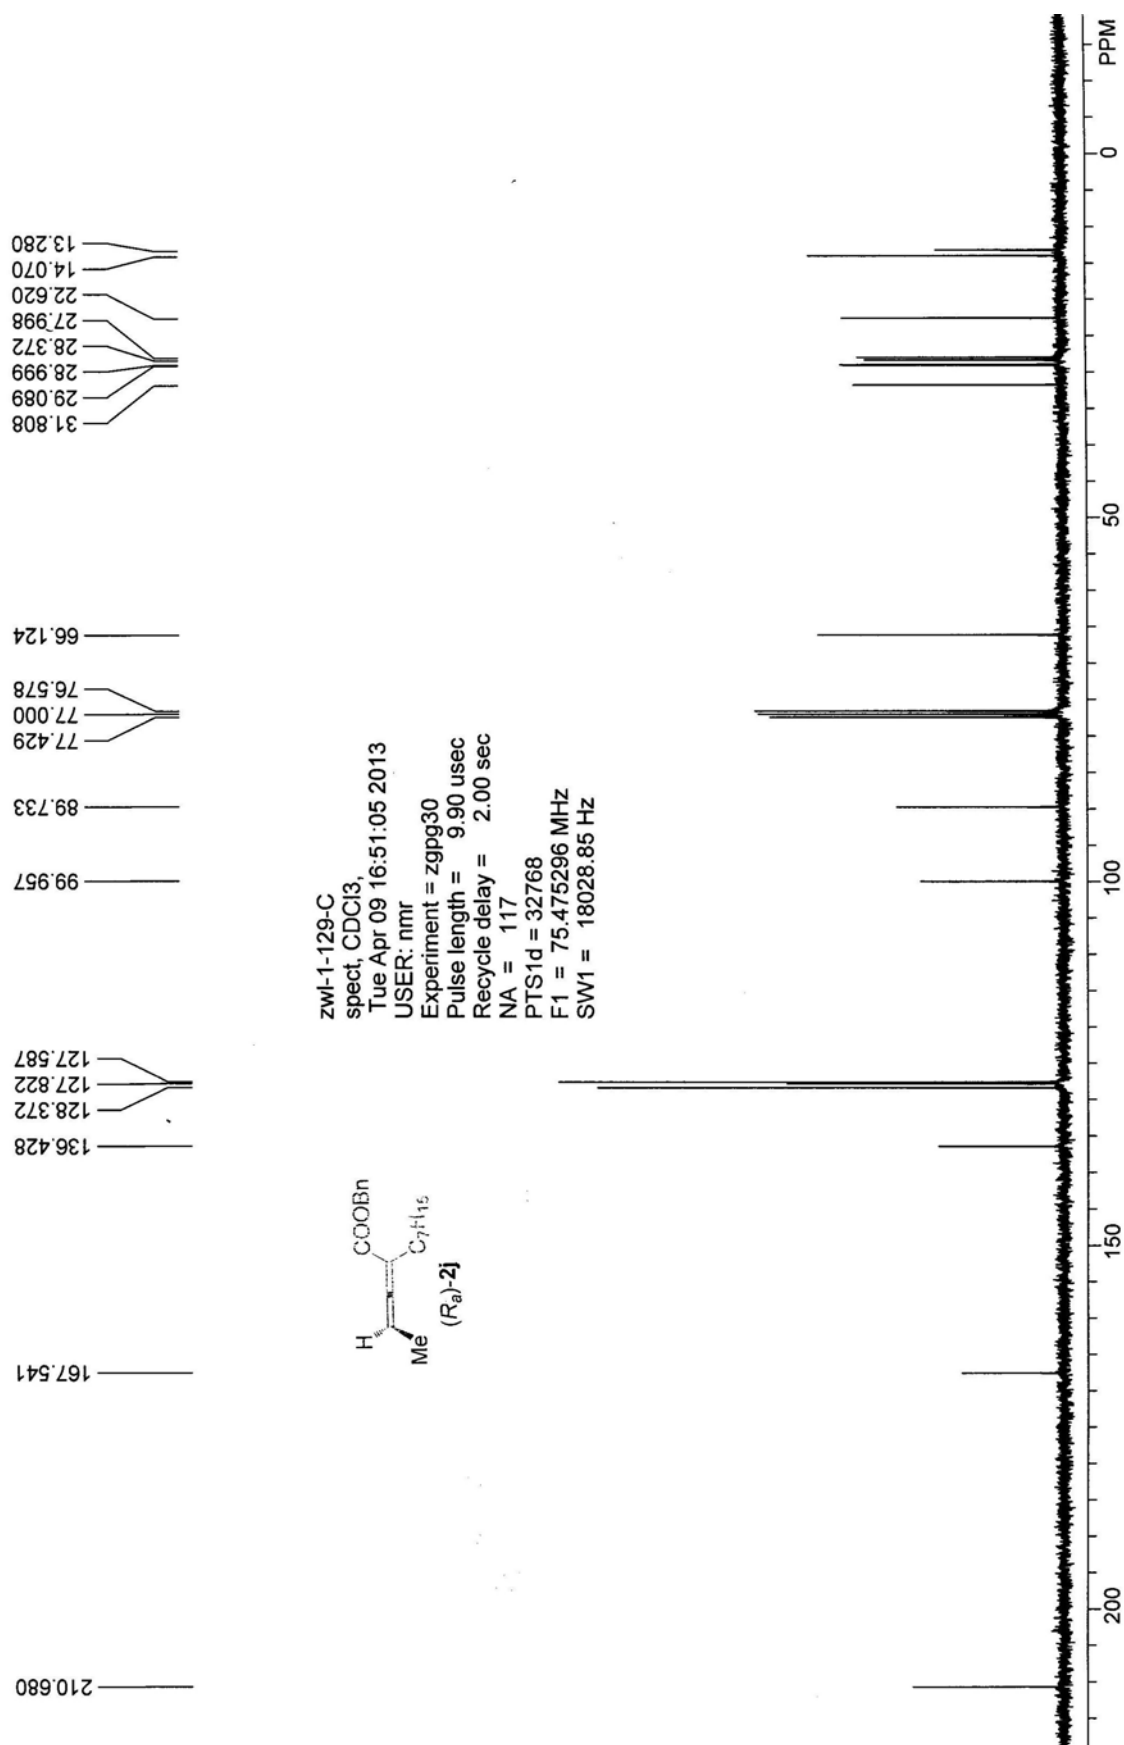

## SAMPLE INFORMATION

|                   |                               |                  |                        |
|-------------------|-------------------------------|------------------|------------------------|
| Sample Name:      | zwf-1-129-whale-200-1-0.5-214 | Acquired By:     | Breeze                 |
| Sample Type:      | 未知                            | Date Acquired:   | 2013/11/5 10:20:14 CST |
| Vial:             | 1                             | Acq. Method:     | zgj100                 |
| Injection #:      | 4                             | Date Processed:  | 2013/11/5 15:18:11 CST |
| Injection Volume: | 10.00 $\mu$ l                 | Channel Name:    | V0489 ChA              |
| Run Time:         | 60.00 Minutes                 | Sample Set Name: |                        |

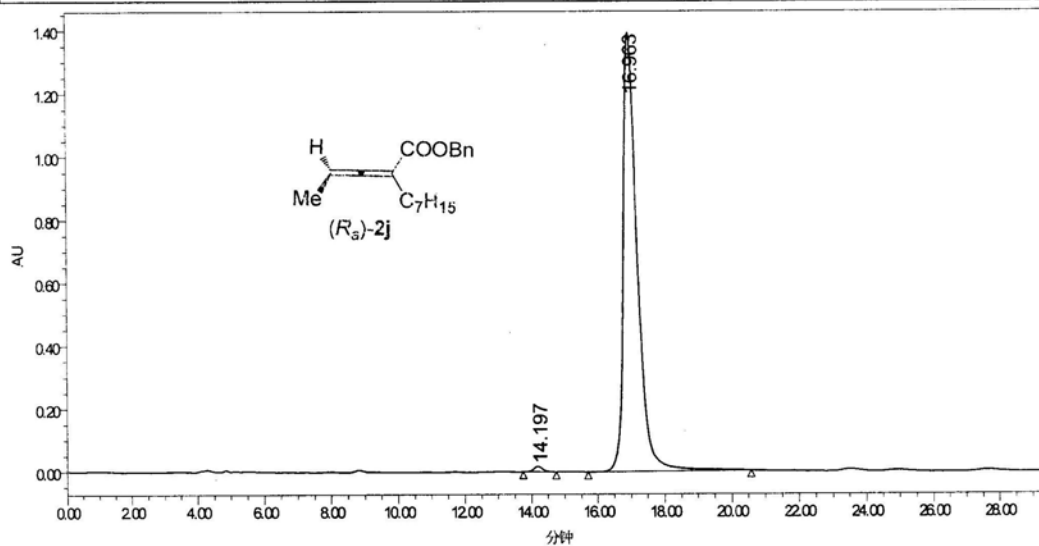

|   | RT<br>(min) | Area<br>(#sec) | %Area | Height<br>(#) | %<br>Height |
|---|-------------|----------------|-------|---------------|-------------|
| 1 | 14.197      | 343930         | 0.83  | 17755         | 1.26        |
| 2 | 16.963      | 40940710       | 99.17 | 139867        | 98.74       |

## SAMPLE INFORMATION

Sample Name: zwl-1-130-whale-200-1-05-214  
Sample Type: 未知  
Vial: 1  
Injection #: 6  
Injection Volume: 10.00  $\mu$ l  
Run Time: 60.00 Minutes

Acquired By: Breeze  
Date Acquired: 2013/11/5 11:36:35 CST  
Acq. Method: zg100  
Date Processed: 2013/11/5 15:16:24 CST  
Channel Name: V0489 ChA  
Sample Set Name:

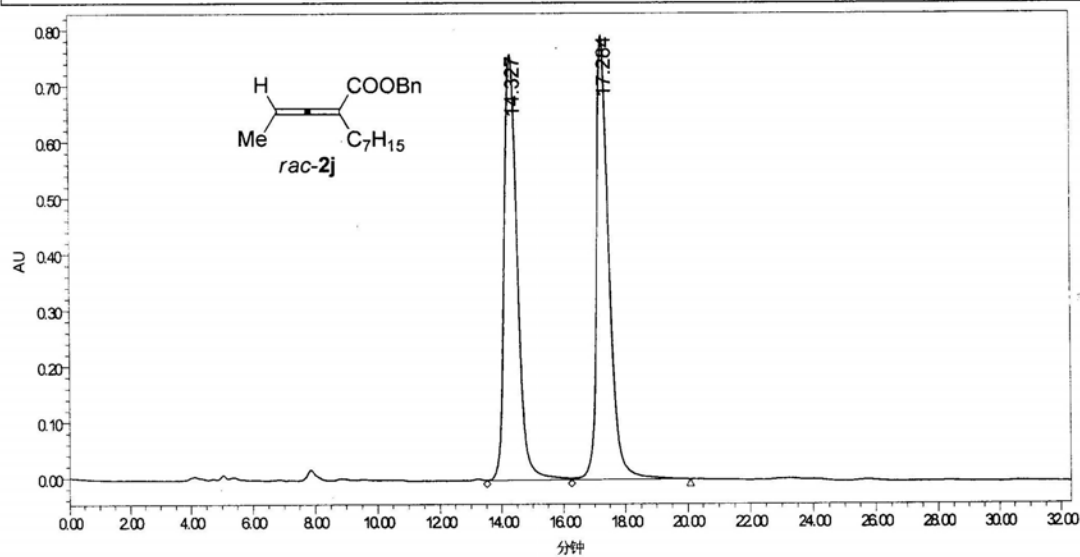

|   | RT<br>(min) | Area<br>(峰面积) | %Area | Height<br>(峰高) | %<br>Height |
|---|-------------|---------------|-------|----------------|-------------|
| 1 | 14.327      | 22230993      | 49.79 | 760131         | 48.93       |
| 2 | 17.284      | 22415126      | 50.21 | 793233         | 51.07       |

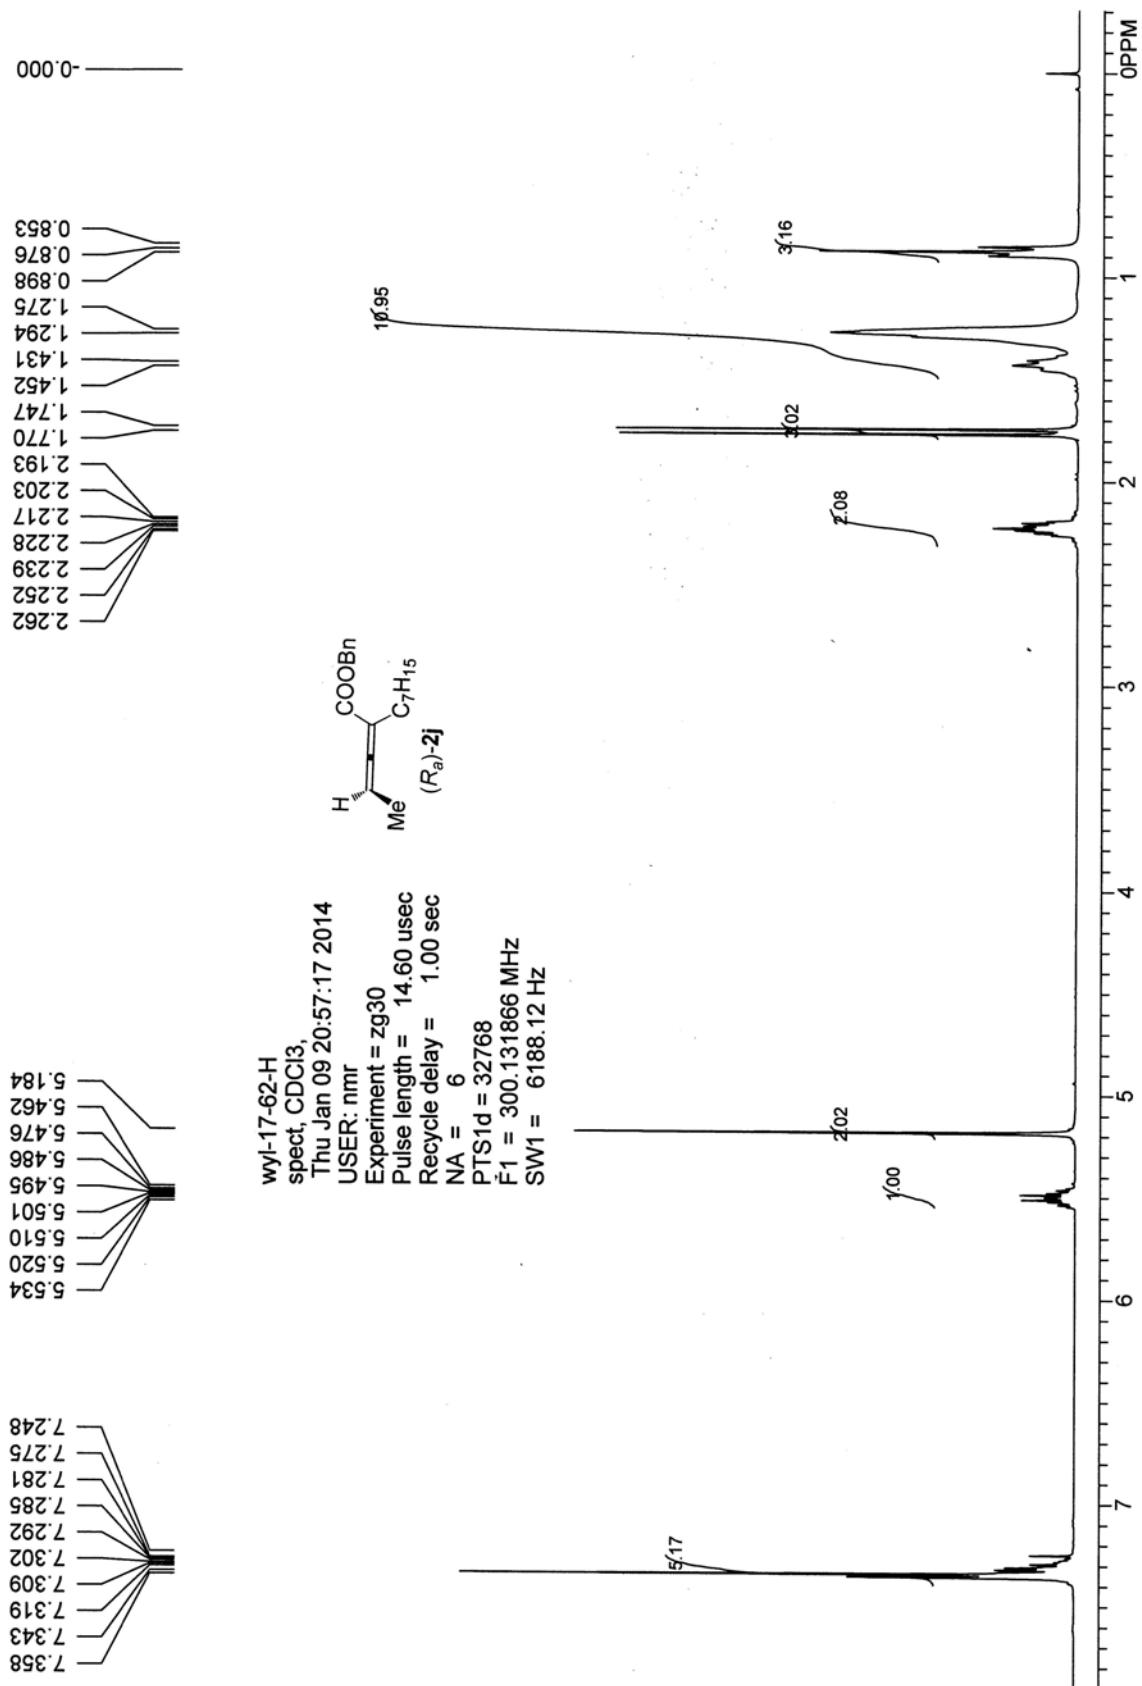

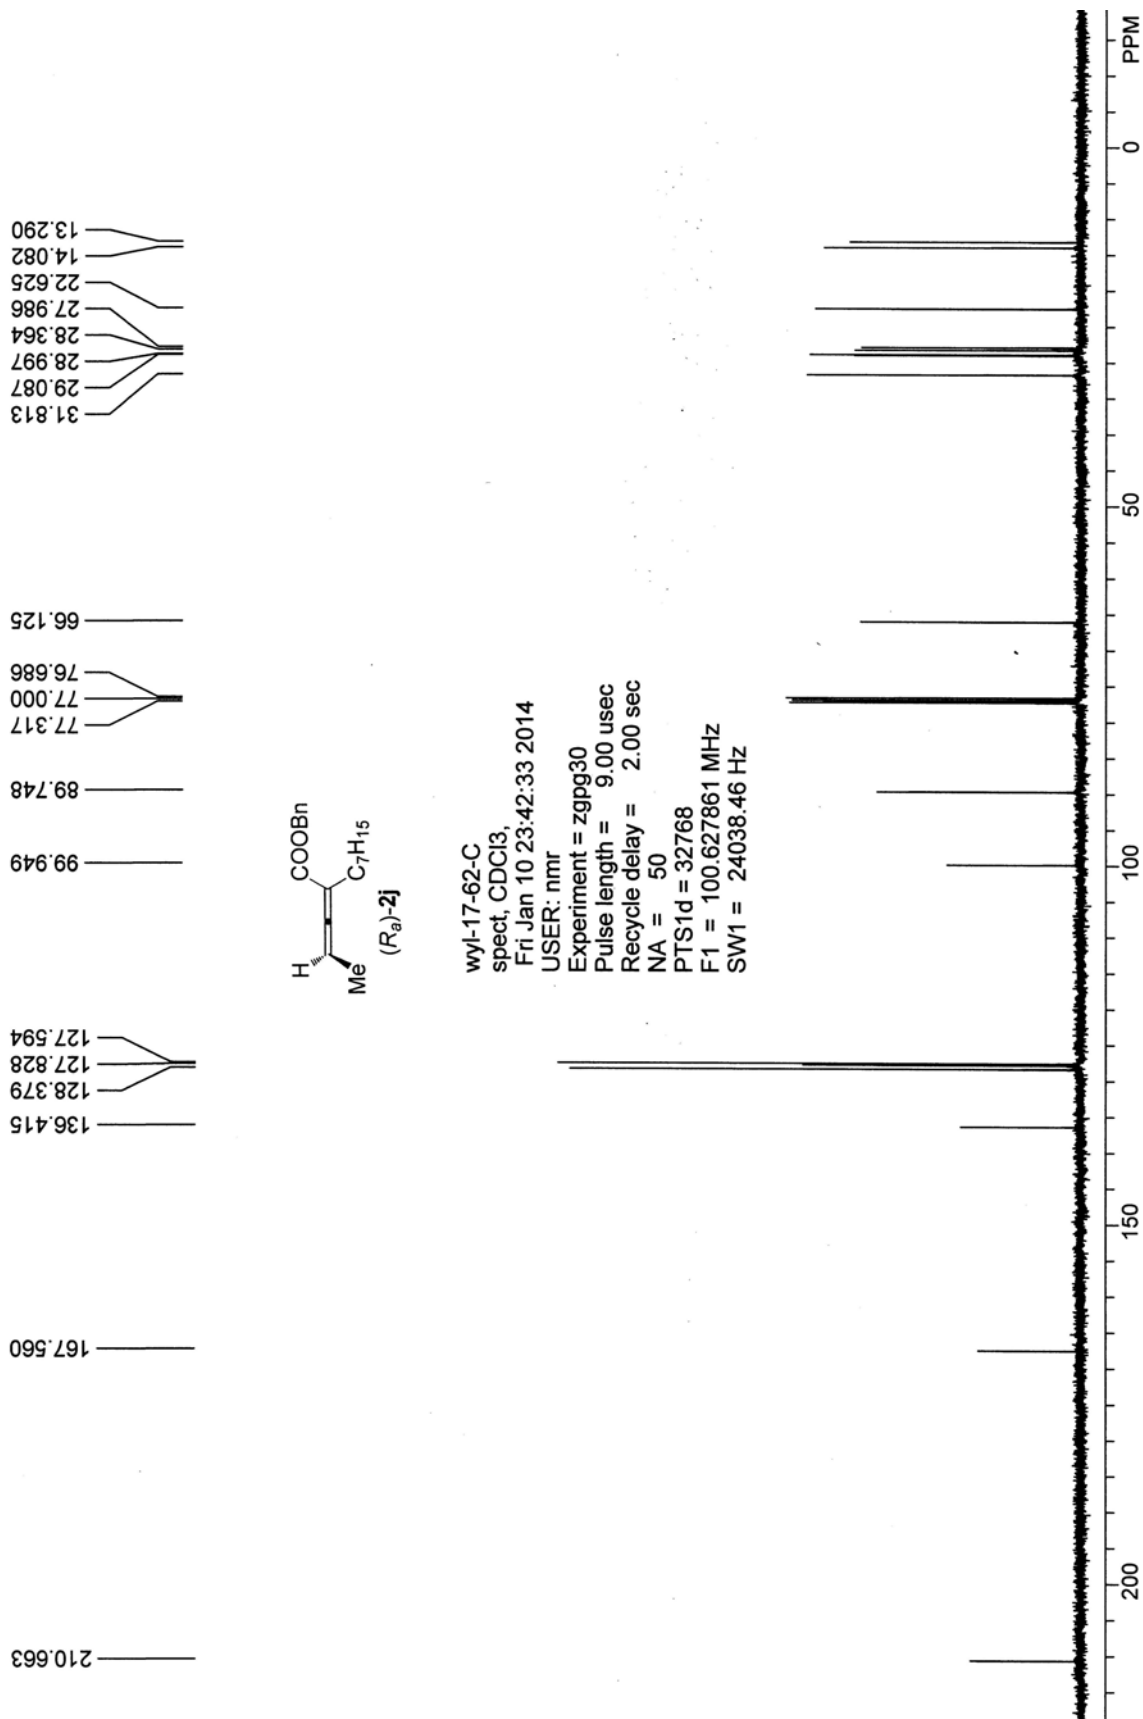

## SAMPLE INFORMATION

|                   |                             |                  |                         |
|-------------------|-----------------------------|------------------|-------------------------|
| Sample Name:      | wyl-17-62-whale-200-1-1-214 | Acquired By:     | Breeze                  |
| Sample Type:      | 未知                          | Date Acquired:   | 2013/12/31 12:41:58 CST |
| Vial:             | 1                           | Acq. Method:     | zg100                   |
| Injection#:       | 16                          | Date Processed:  | 2013/12/31 13:55:17 CST |
| Injection Volume: | 10.00 u                     | Channel Name:    | V0489 ChA               |
| Run Time:         | 60.00 Minutes               | Sample Set Name: |                         |

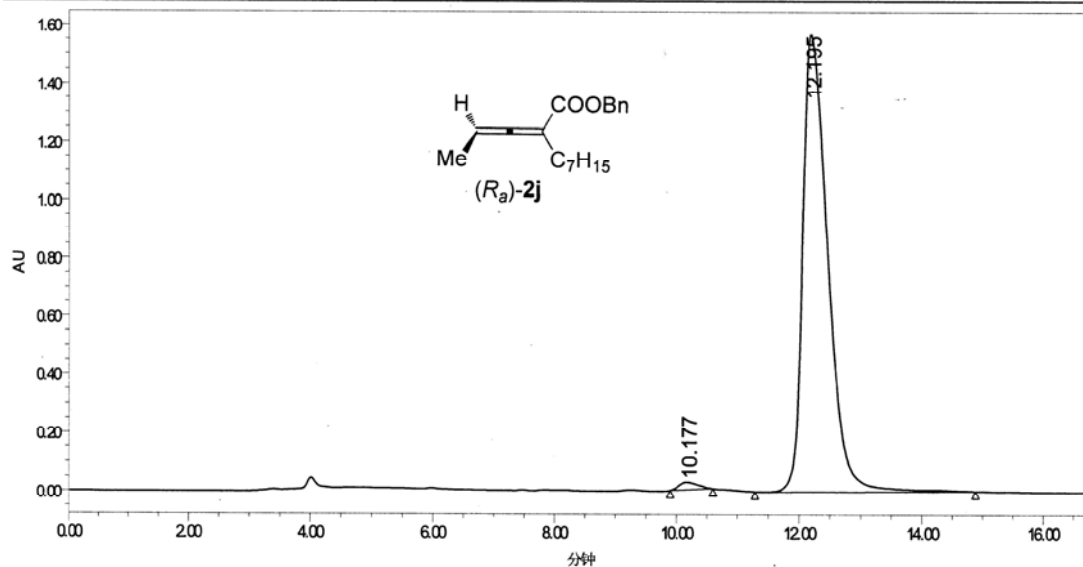

|   | RT<br>(min) | Area<br>(msec) | %Area | Hight<br>(mm) | %<br>Hight |
|---|-------------|----------------|-------|---------------|------------|
| 1 | 10.177      | 579242         | 1.29  | 26623         | 1.67       |
| 2 | 12.196      | 44349320       | 98.71 | 1567366       | 98.33      |

# SAMPLE INFORMATION

|                   |                             |                  |                         |
|-------------------|-----------------------------|------------------|-------------------------|
| Sample Name:      | zwf-1-130-whale-200-1-1-214 | Acquired By:     | Breeze                  |
| Sample Type:      | 未知                          | Date Acquired:   | 2013/12/31 11:59:56 CST |
| Vial:             | 1                           | Acq. Method:     | zg100                   |
| Injection #:      | 14                          | Date Processed:  | 2013/12/31 16:46:25 CST |
| Injection Volume: | 10.00 uL                    | Channel Name:    | V2489 CHA               |
| Run Time:         | 60.00 Minutes               | Sample Set Name: |                         |

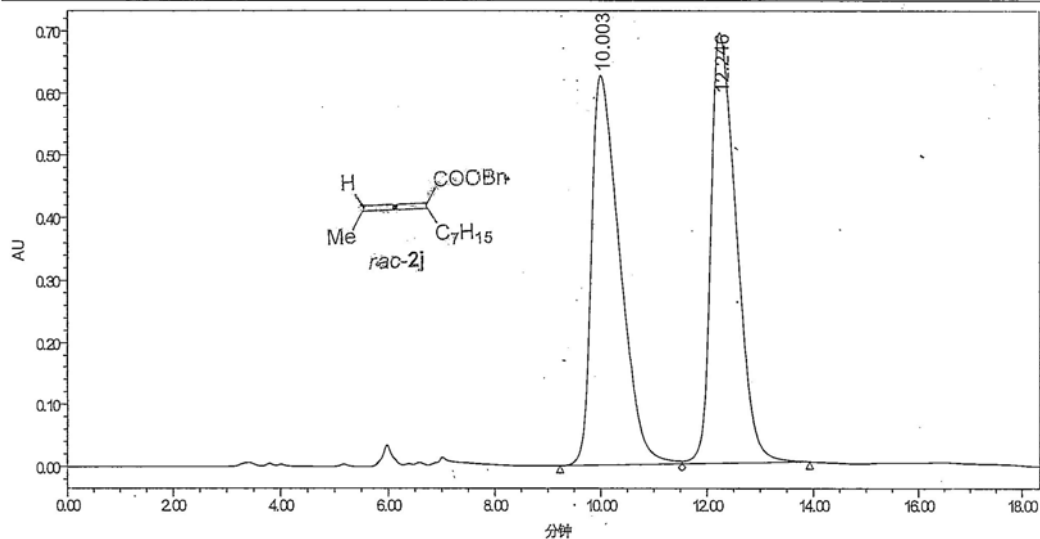

|   | RT<br>(min) | Area<br>(msec) | %Area | Hight<br>(msec) | %<br>Hight |
|---|-------------|----------------|-------|-----------------|------------|
| 1 | 10.003      | 23241379       | 50.18 | 626142          | 47.51      |
| 2 | 12.246      | 23076326       | 49.82 | 691879          | 52.49      |



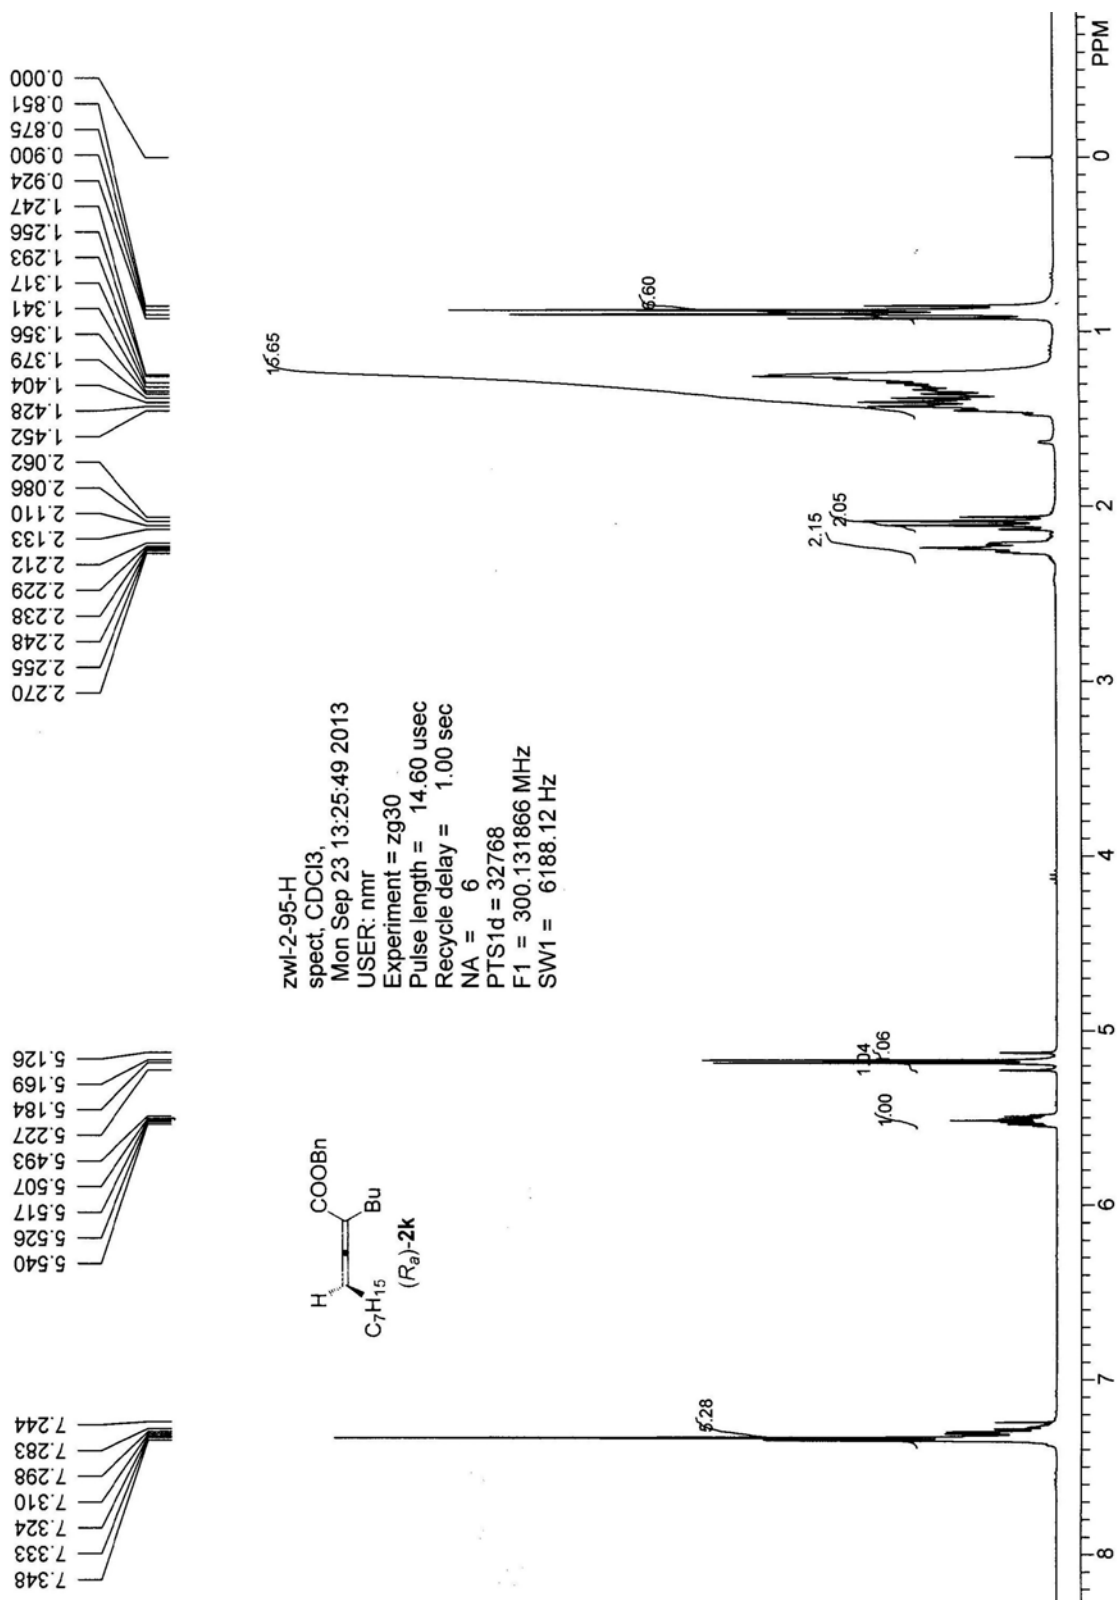

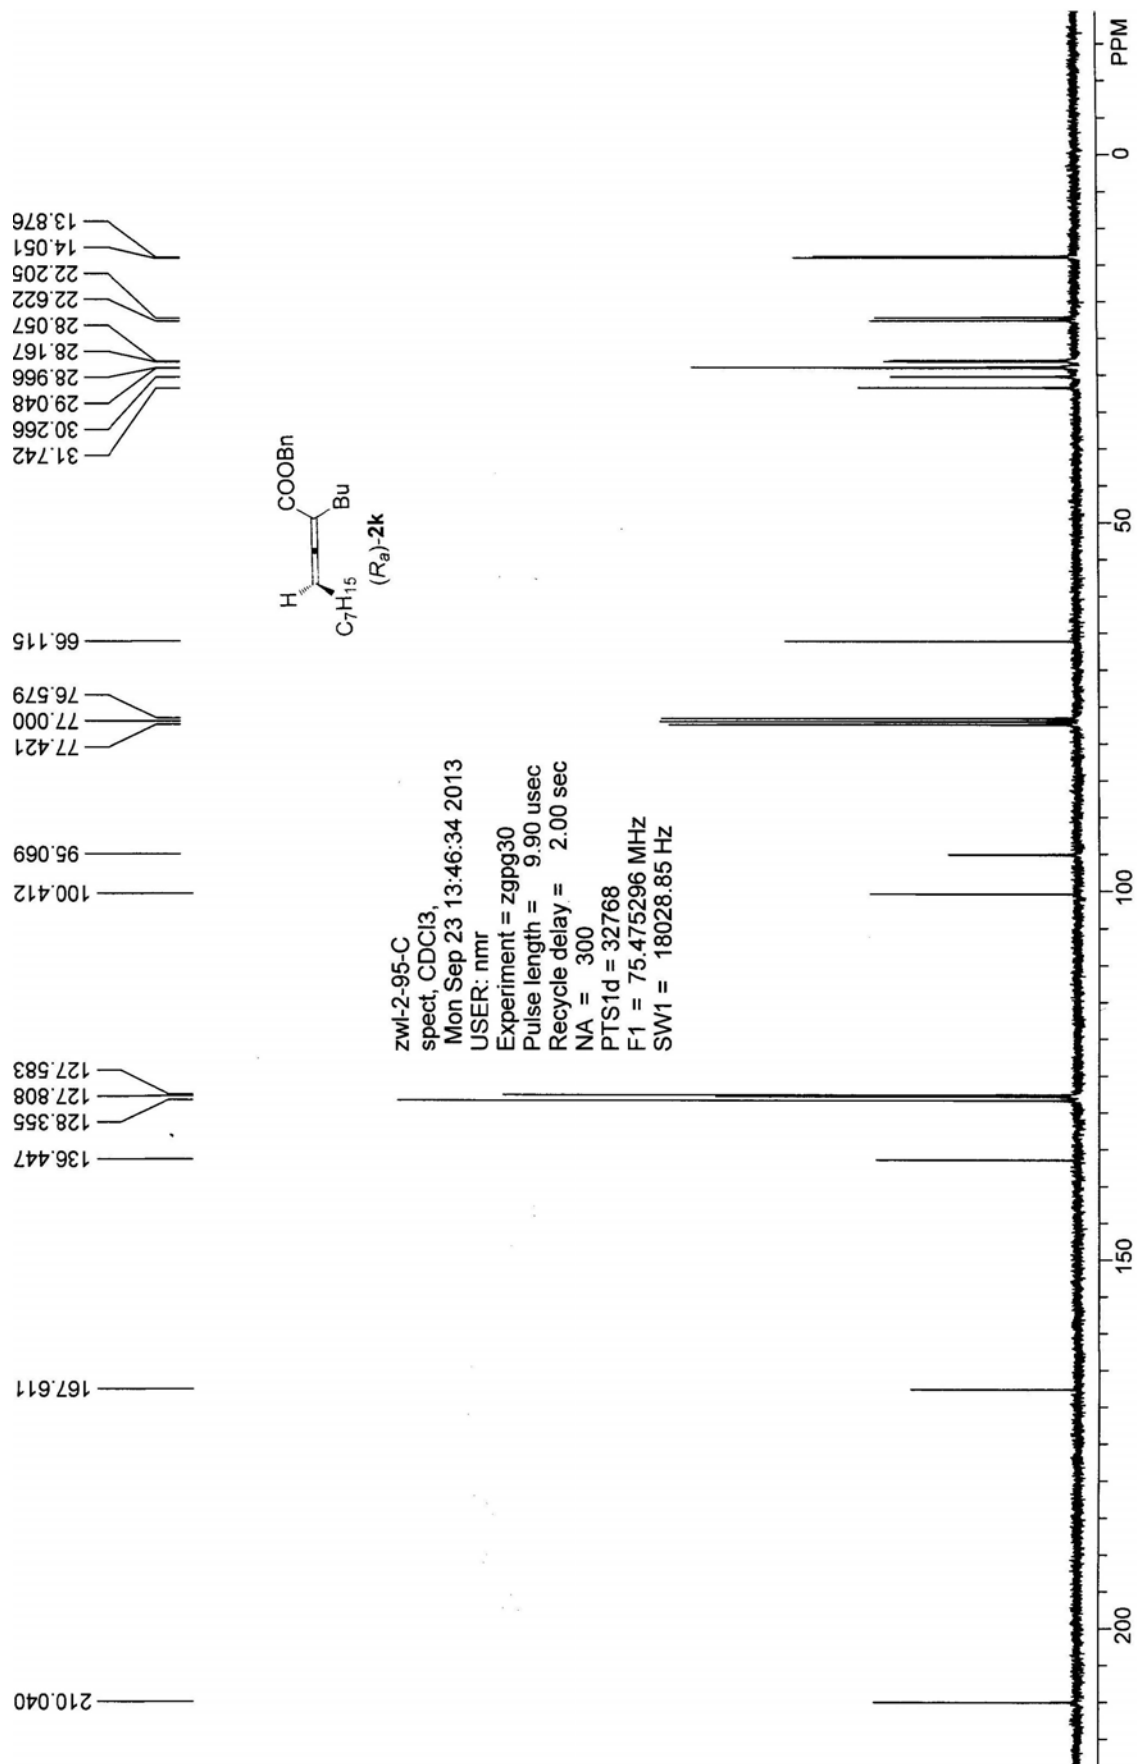

# zw1-2-95-whelk-200-1-1-214

实验时间: 2013/9/24, 9:54:02

报告时间: 2013/9/24, 11:27:38

谱图文件: D:\zhuguangjiong\zw1\20130924\zw1-2-95-whelk-200-1-1-214.org

实验内容简介:

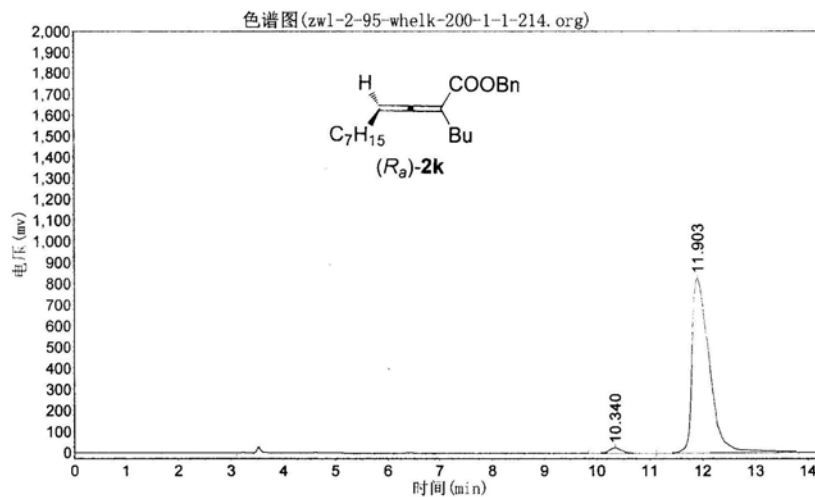

分析结果表

| 峰号 | 峰名 | 保留时间   | 峰高         | 峰面积          | 含量       |
|----|----|--------|------------|--------------|----------|
| 1  |    | 10.340 | 26013.137  | 398905.344   | 2.1085   |
| 2  |    | 11.903 | 824633.313 | 18519628.000 | 97.8915  |
| 总计 |    |        | 850646.449 | 18918533.344 | 100.0000 |

# zw1-2-45-whelk-200-1-1-214

实验时间: 2013/9/24, 9:35:48

报告时间: 2013/9/24, 11:29:02

谱图文件: D:\zhuguangjiong\zw1\20130924\zw1-2-45-whelk-200-1-1-214.org

实验内容简介:

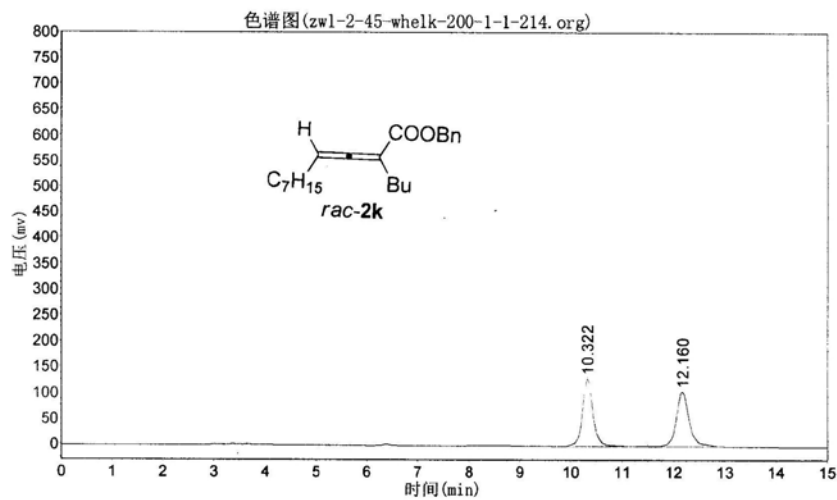

分析结果表

| 峰号 | 峰名 | 保留时间   | 峰高         | 峰面积         | 含量       |
|----|----|--------|------------|-------------|----------|
| 1  |    | 10.322 | 129877.438 | 1893951.375 | 50.1008  |
| 2  |    | 12.160 | 105808.227 | 1886327.500 | 49.8992  |
| 总计 |    |        | 235685.664 | 3780278.875 | 100.0000 |

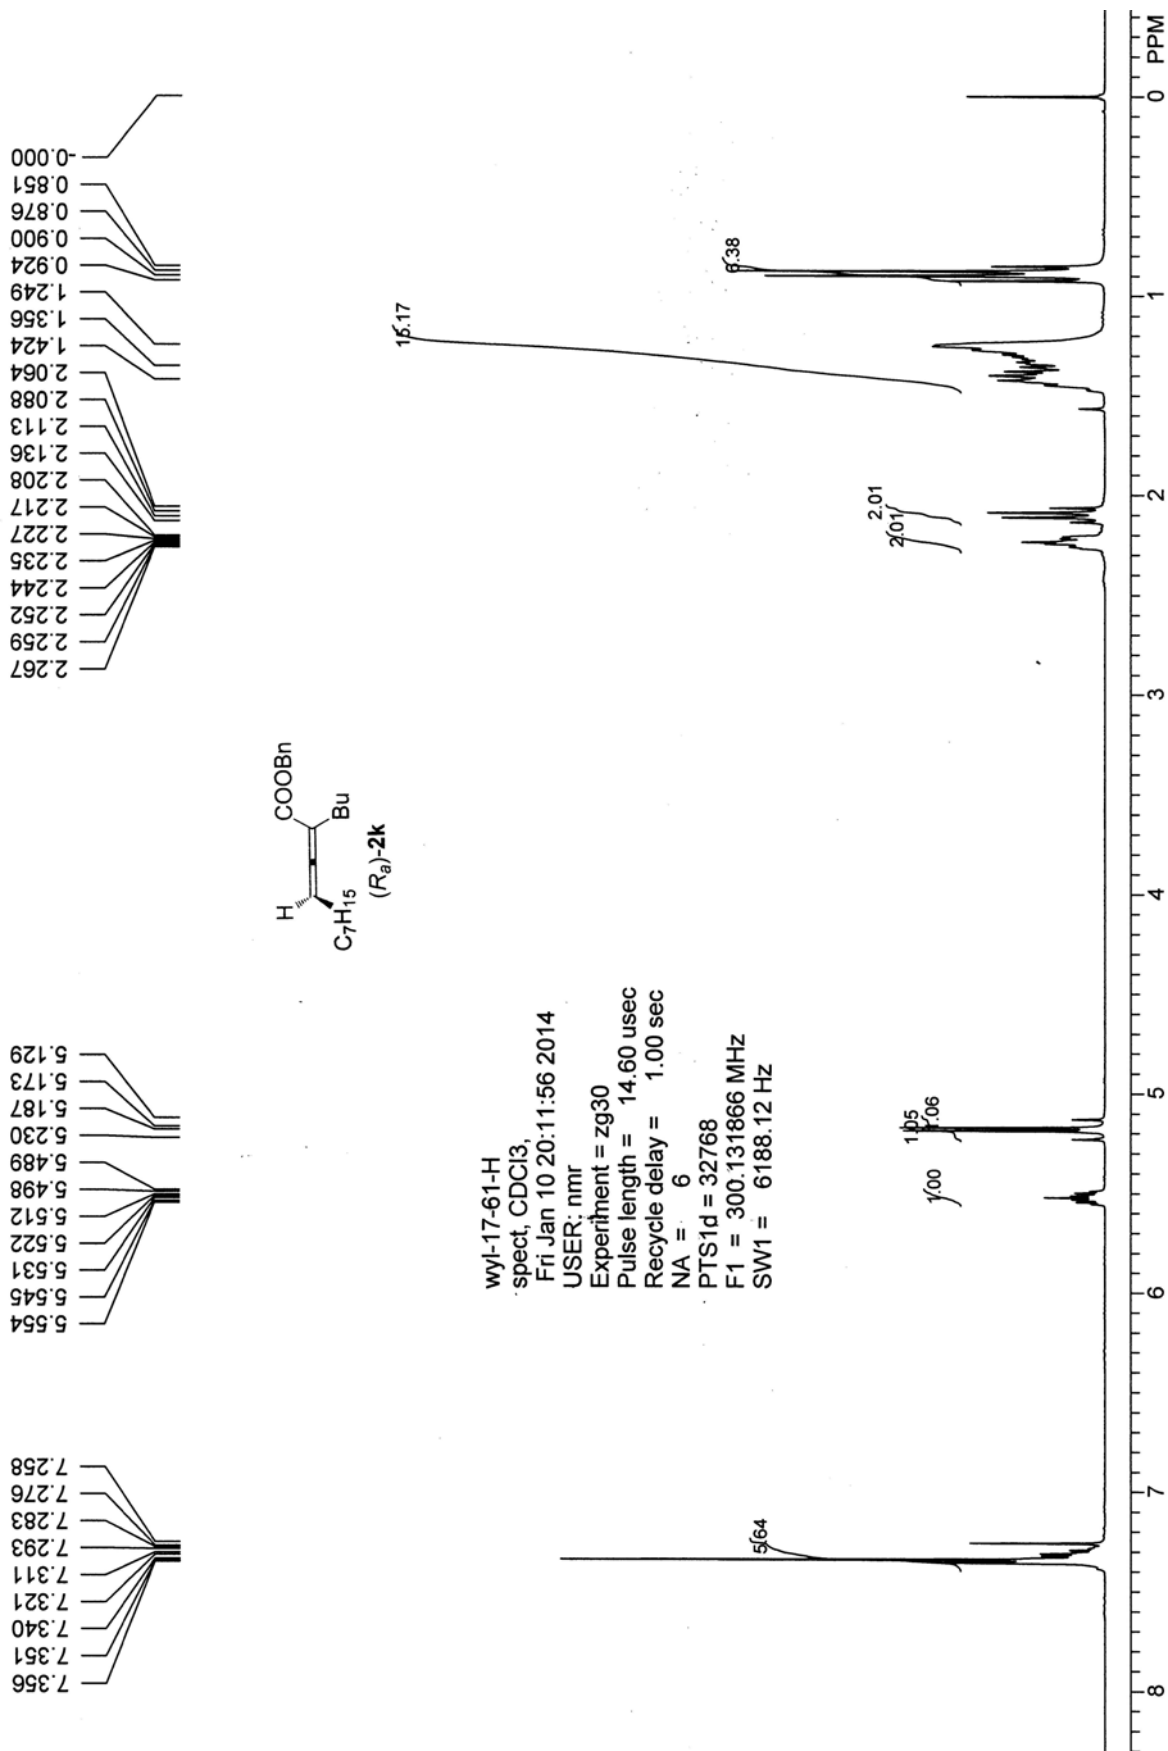

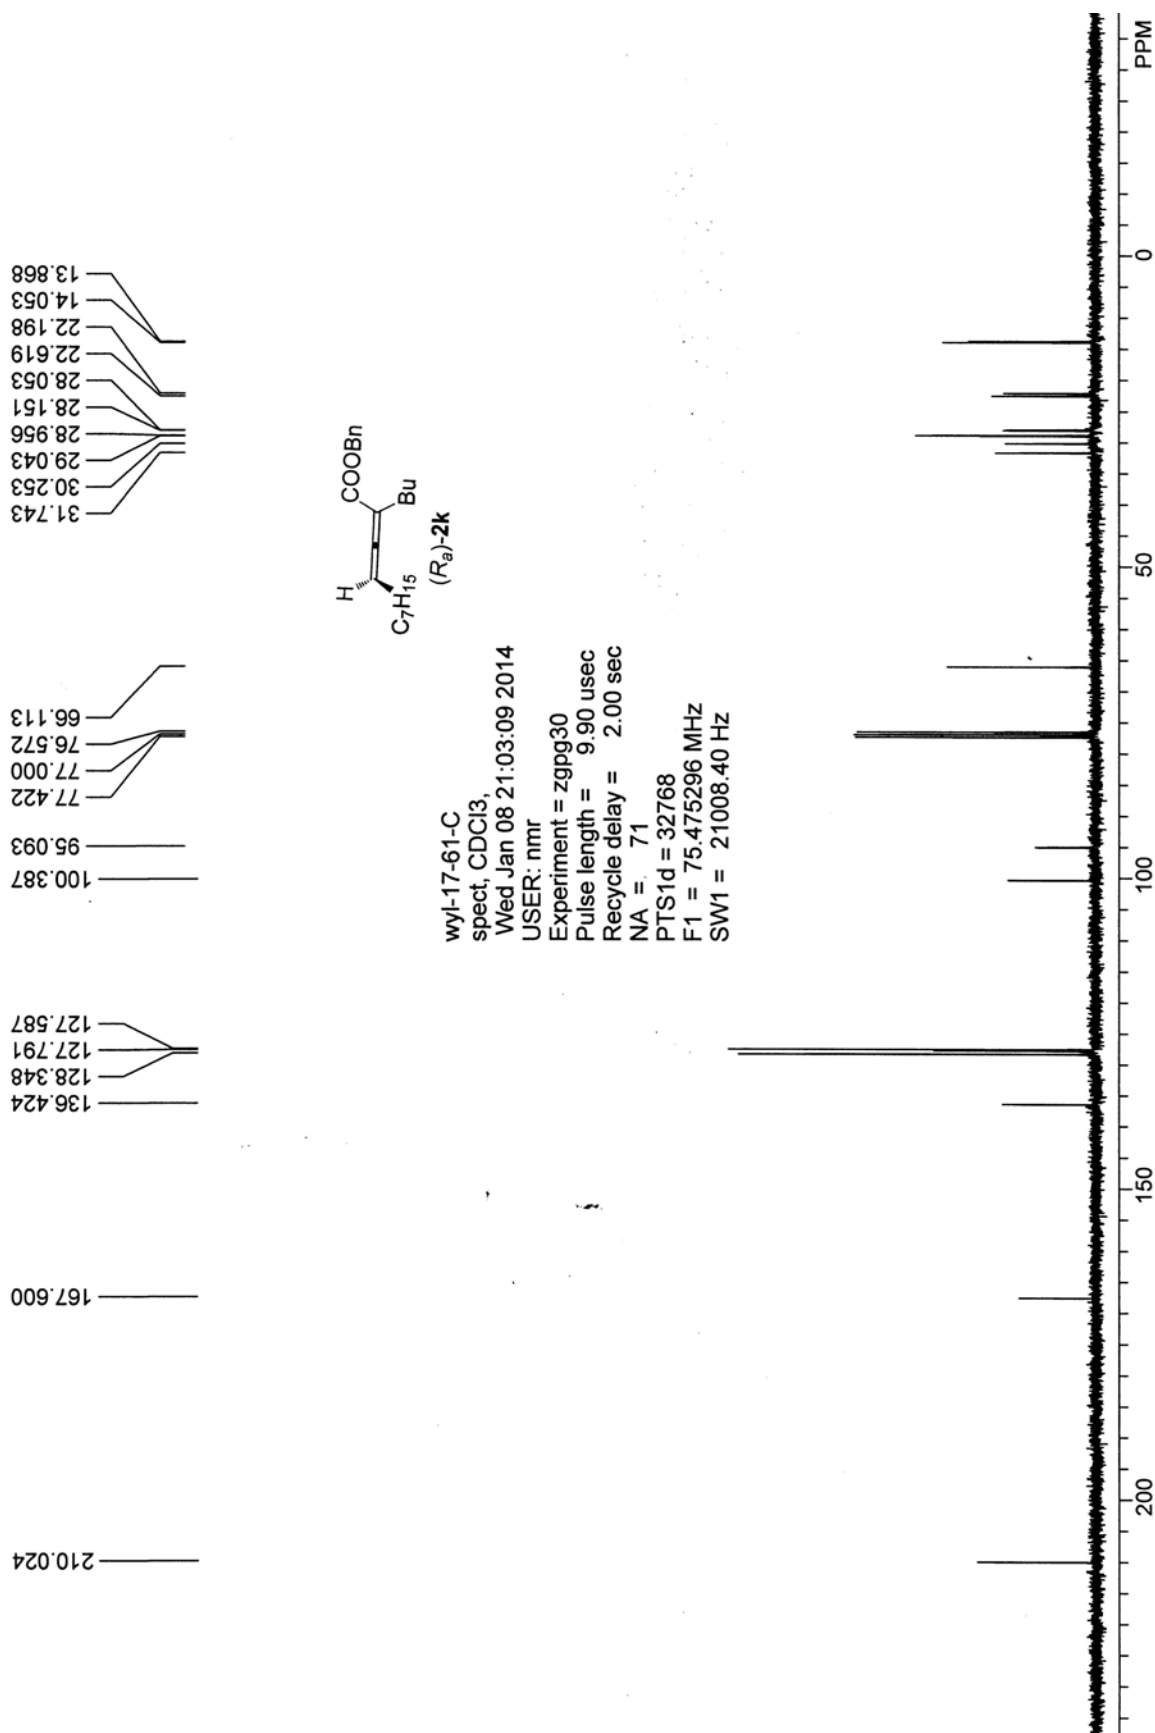

## SAMPLE INFORMATION

|                   |                             |                  |                         |
|-------------------|-----------------------------|------------------|-------------------------|
| Sample Name:      | wyl-17-61-whale-200-1-1-214 | Acquired By:     | Breeze                  |
| Sample Type:      | 未知                          | Date Acquired:   | 2013/12/31 10:07:13 CST |
| Vial:             | 1                           | Acq. Method:     | zg100                   |
| Injection#:       | 8                           | Date Processed:  | 2013/12/31 12:34:16 CST |
| Injection Volume: | 10.00 uL                    | Channel Name:    | V0489 ChA               |
| Run Time:         | 60.00 Minutes               | Sample Set Name: |                         |

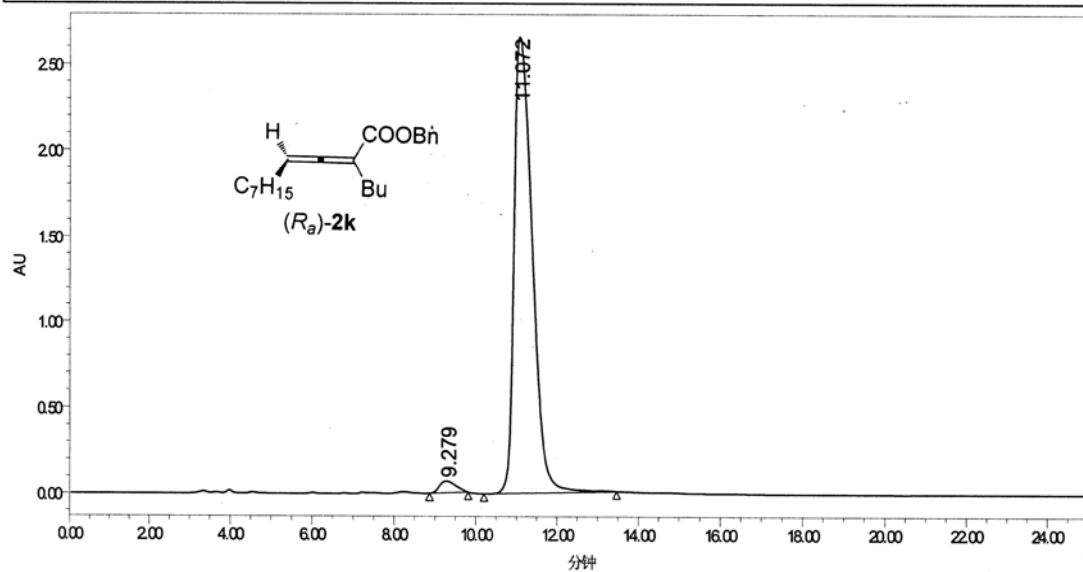

|   | RT<br>(min) | Area<br>(msec) | %Area | Height<br>(msec) | %<br>Height |
|---|-------------|----------------|-------|------------------|-------------|
| 1 | 9.279       | 1883123        | 2.22  | 68076            | 2.50        |
| 2 | 11.072      | 82828456       | 97.78 | 2654040          | 97.50       |

## SAMPLE INFORMATION

|                   |                            |                  |                         |
|-------------------|----------------------------|------------------|-------------------------|
| Sample Name:      | zwl-2-45-whale-200-1-1-214 | Acquired By:     | Breeze                  |
| Sample Type:      | 未知                         | Date Acquired:   | 2013/12/31 9:28:30 CST  |
| Vial:             | 1                          | Acq. Method:     | zg100                   |
| Injection #:      | 6                          | Date Processed:  | 2013/12/31 16:47:05 CST |
| Injection Volume: | 10.00 $\mu$ l              | Channel Name:    | V2489 ChA               |
| Run Time:         | 60.00 Minutes              | Sample Set Name: |                         |

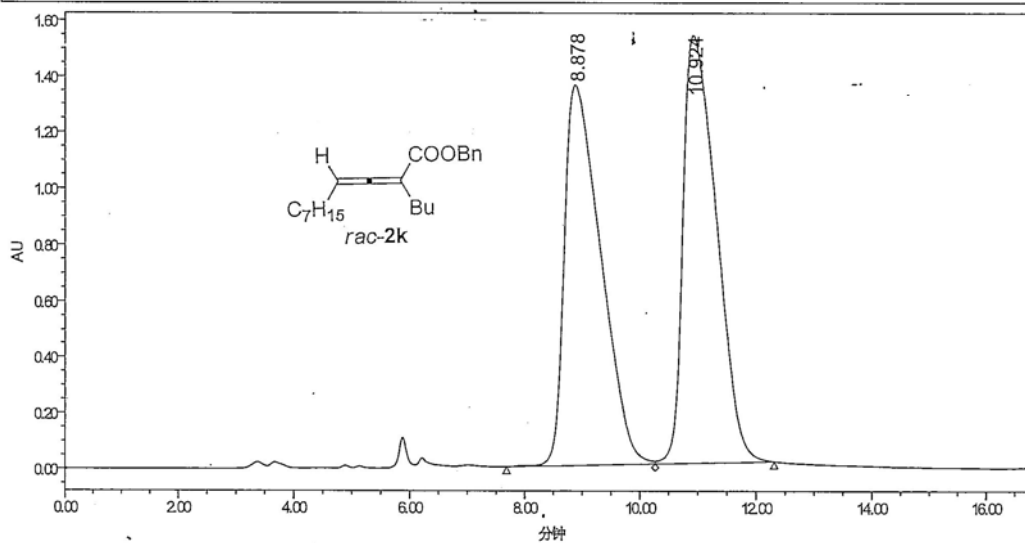

|   | RT<br>(min) | Area<br>(峰面积) | %Area | Height<br>(峰高) | %<br>Height |
|---|-------------|---------------|-------|----------------|-------------|
| 1 | 8.878       | 59740630      | 49.51 | 1357028        | 47.05       |
| 2 | 10.924      | 60920528      | 50.49 | 1527175        | 52.95       |



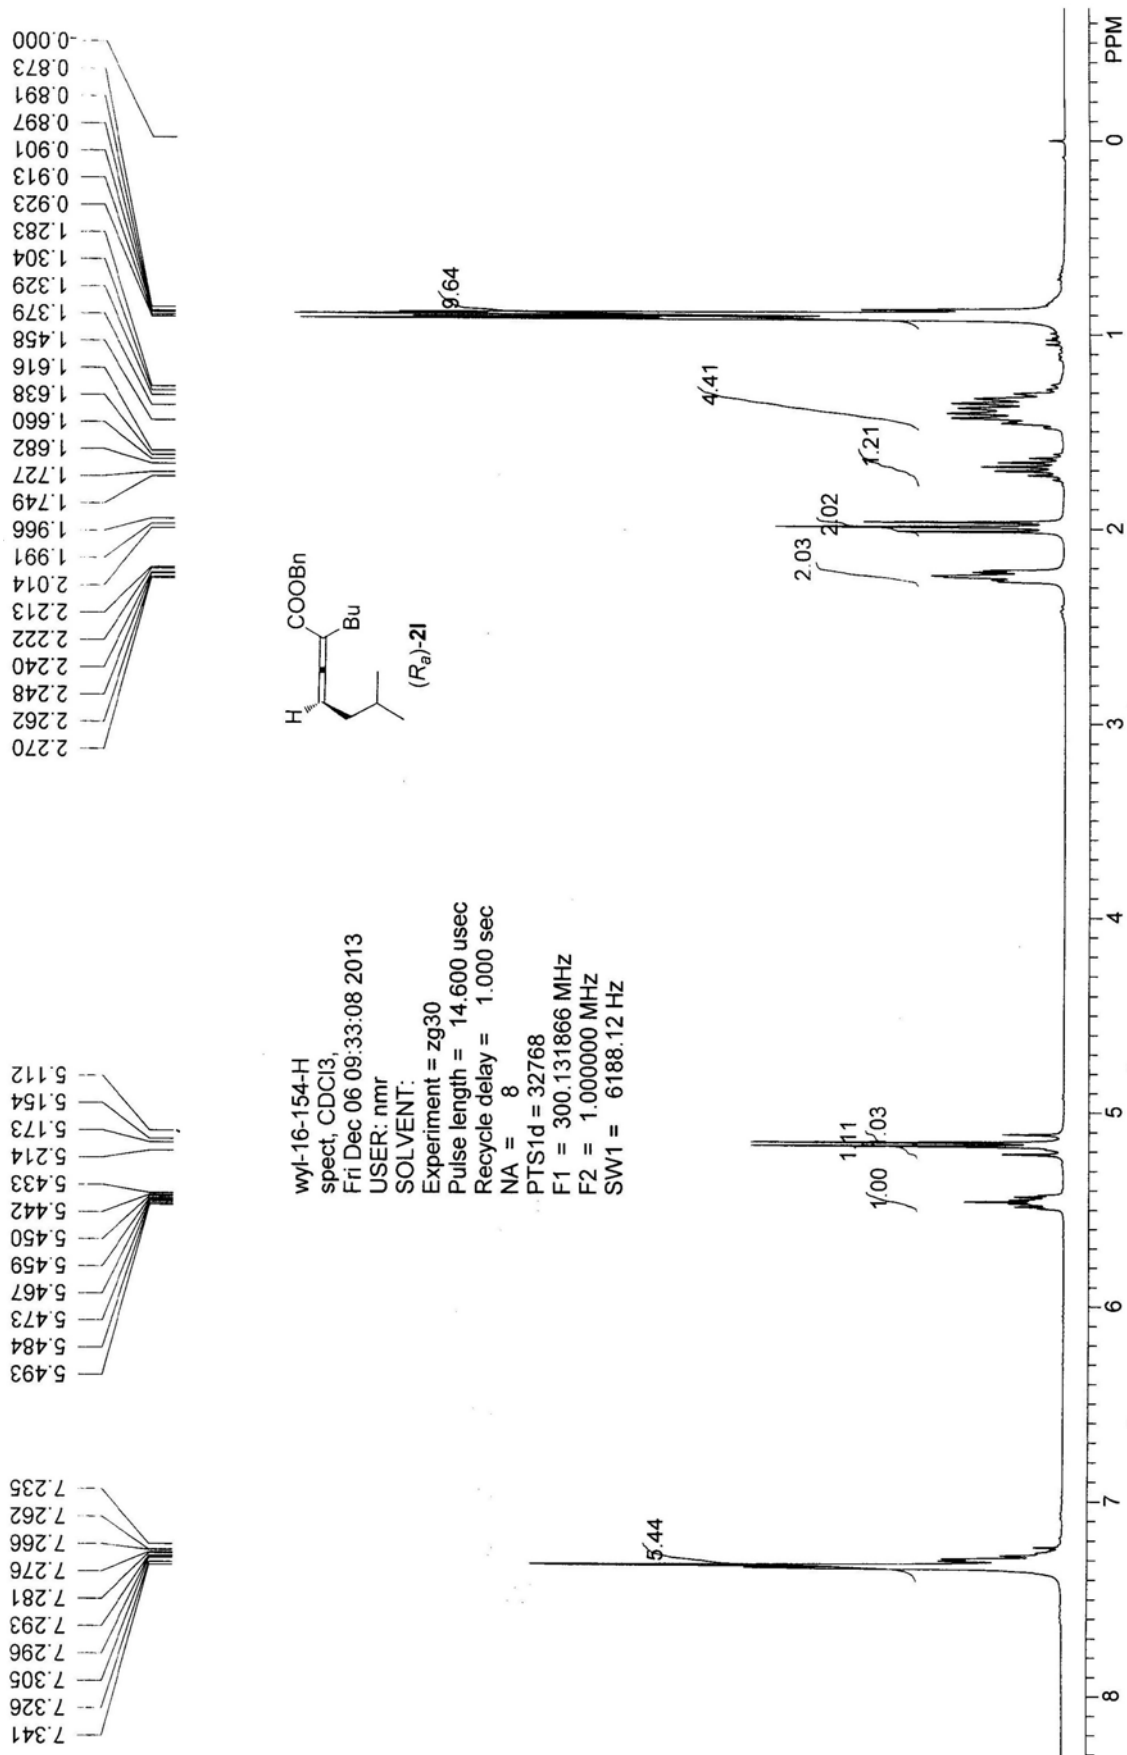

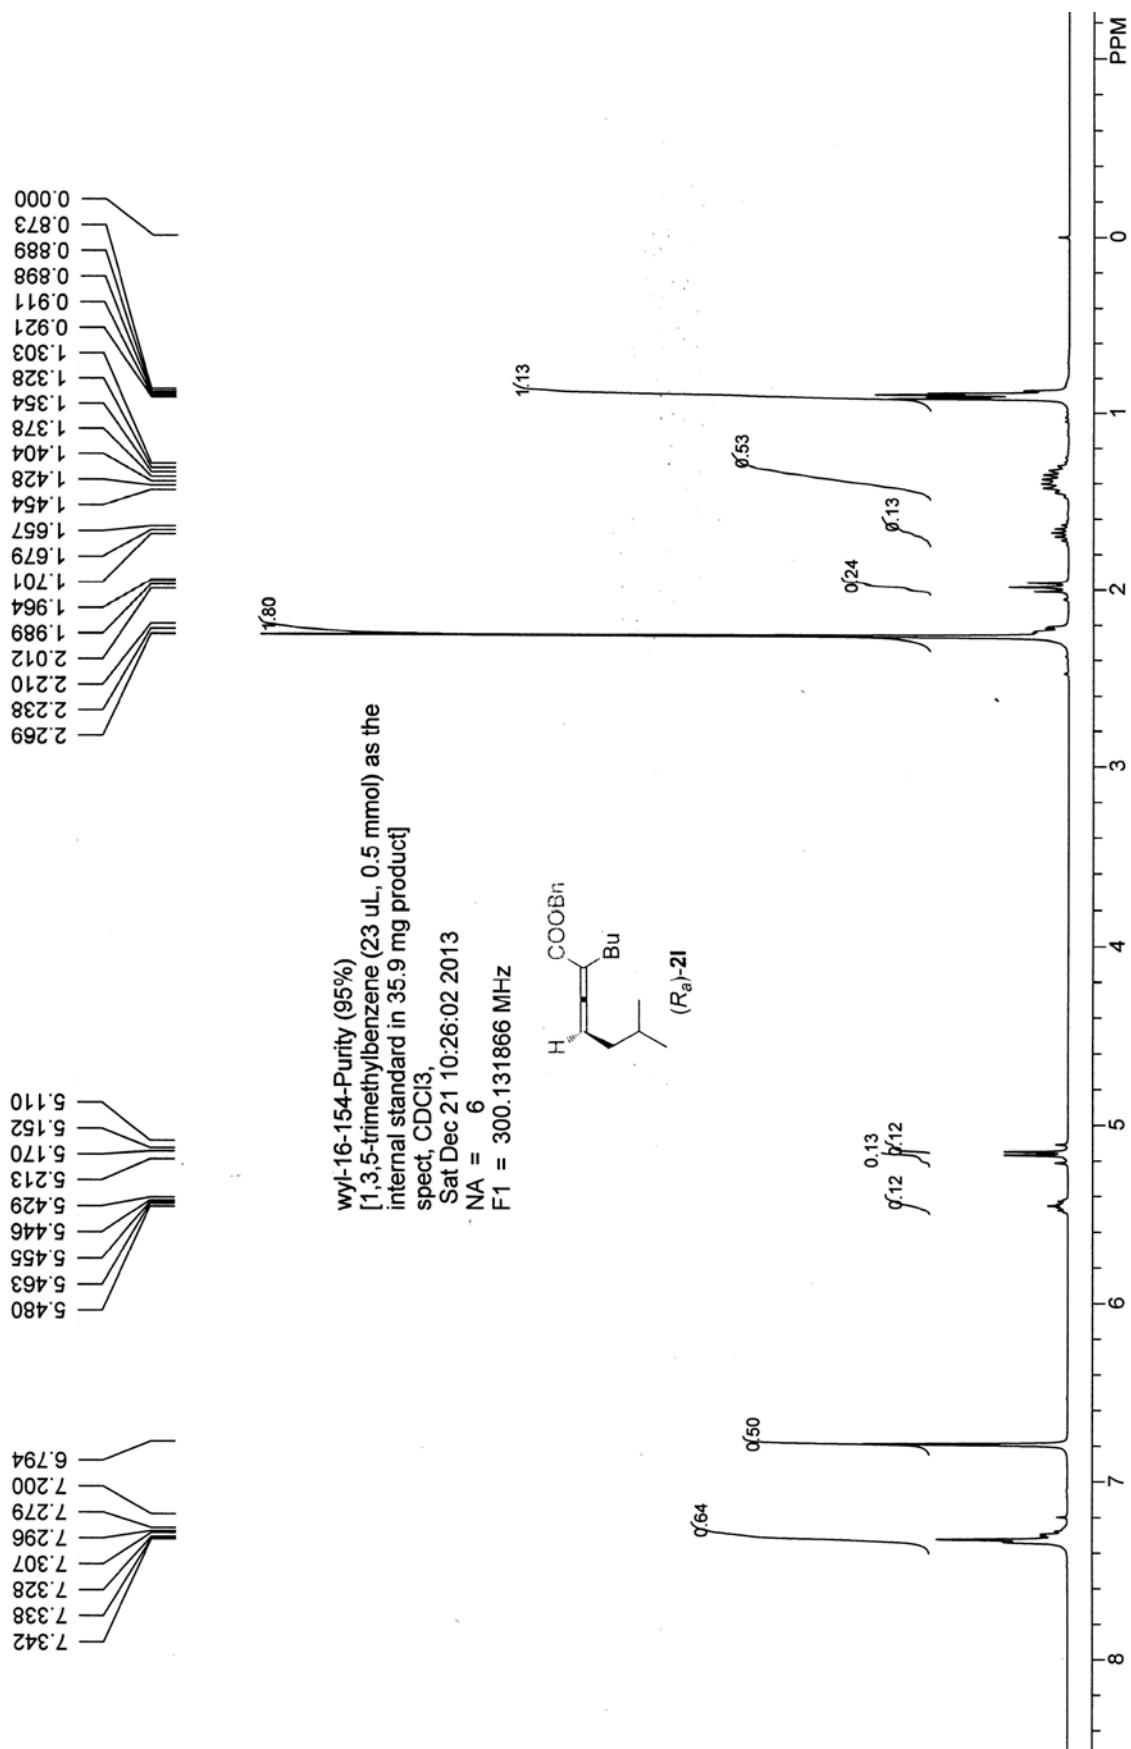

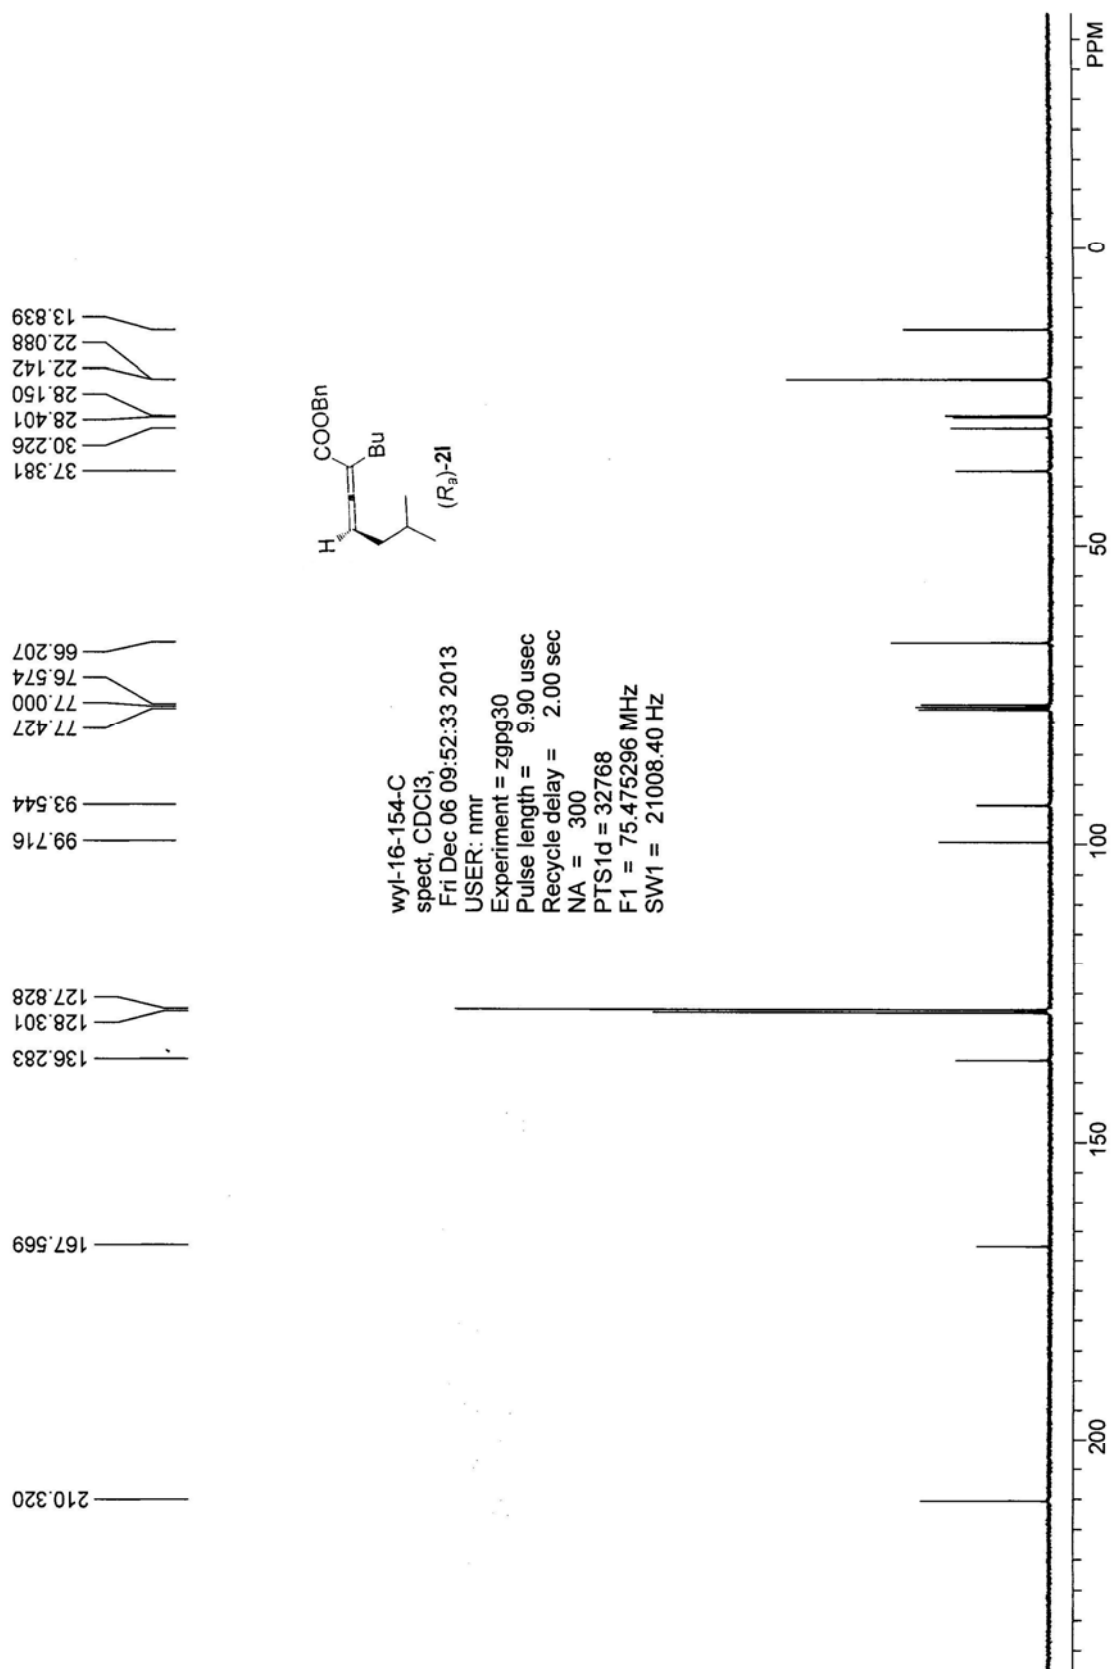

# wyl-16-154-whelk-s, s-400-1-0.5-214

实验时间: 2013/6/28, 15:16:47

报告时间: 2013/6/28, 15:57:30

谱图文件: D:\zhuguangjiong\wyl\20130628\wyl-16-154-whelk-s, s-400-1-0.5-214.org

实验内容简介:  
whelk-s, s 400+1  
0.5ml/min 214nm

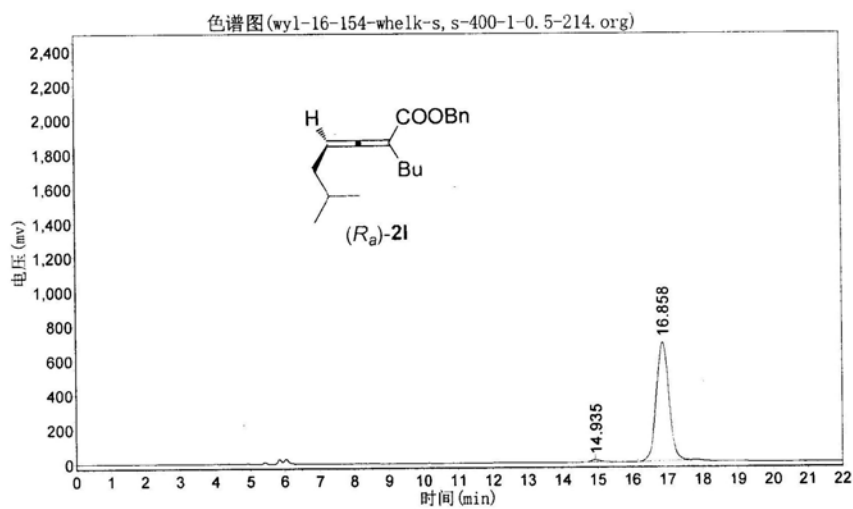

分析结果表

| 峰号 | 峰名 | 保留时间   | 峰高         | 峰面积          | 含量       |
|----|----|--------|------------|--------------|----------|
| 1  |    | 14.935 | 13307.122  | 215480.500   | 1.2561   |
| 2  |    | 16.858 | 690324.813 | 16939586.000 | 98.7439  |
| 总计 |    |        | 703631.935 | 17155066.500 | 100.0000 |

# wyl-16-135-whelk-s, s-400-1-0.5-214

实验时间: 2013/6/28, 15:53:16

报告时间: 2013/6/28, 16:18:54

谱图文件: D:\zhuguangjiong\wyl\20130628\wyl-16-135-whelk-s, s-400-1-0.5-214.org

实验内容简介:

whelk-s, s 400+1

0.5ml/min 214nm

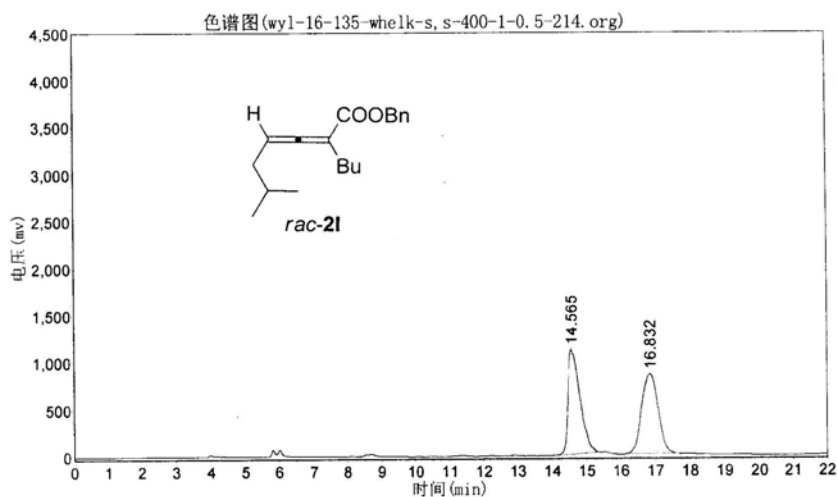

分析结果表

| 峰号 | 峰名 | 保留时间   | 峰高          | 峰面积          | 含量       |
|----|----|--------|-------------|--------------|----------|
| 1  |    | 14.565 | 1107220.375 | 27030012.000 | 49.5097  |
| 2  |    | 16.832 | 842960.688  | 27565426.000 | 50.4903  |
| 总计 |    |        | 1950181.063 | 54595438.000 | 100.0000 |

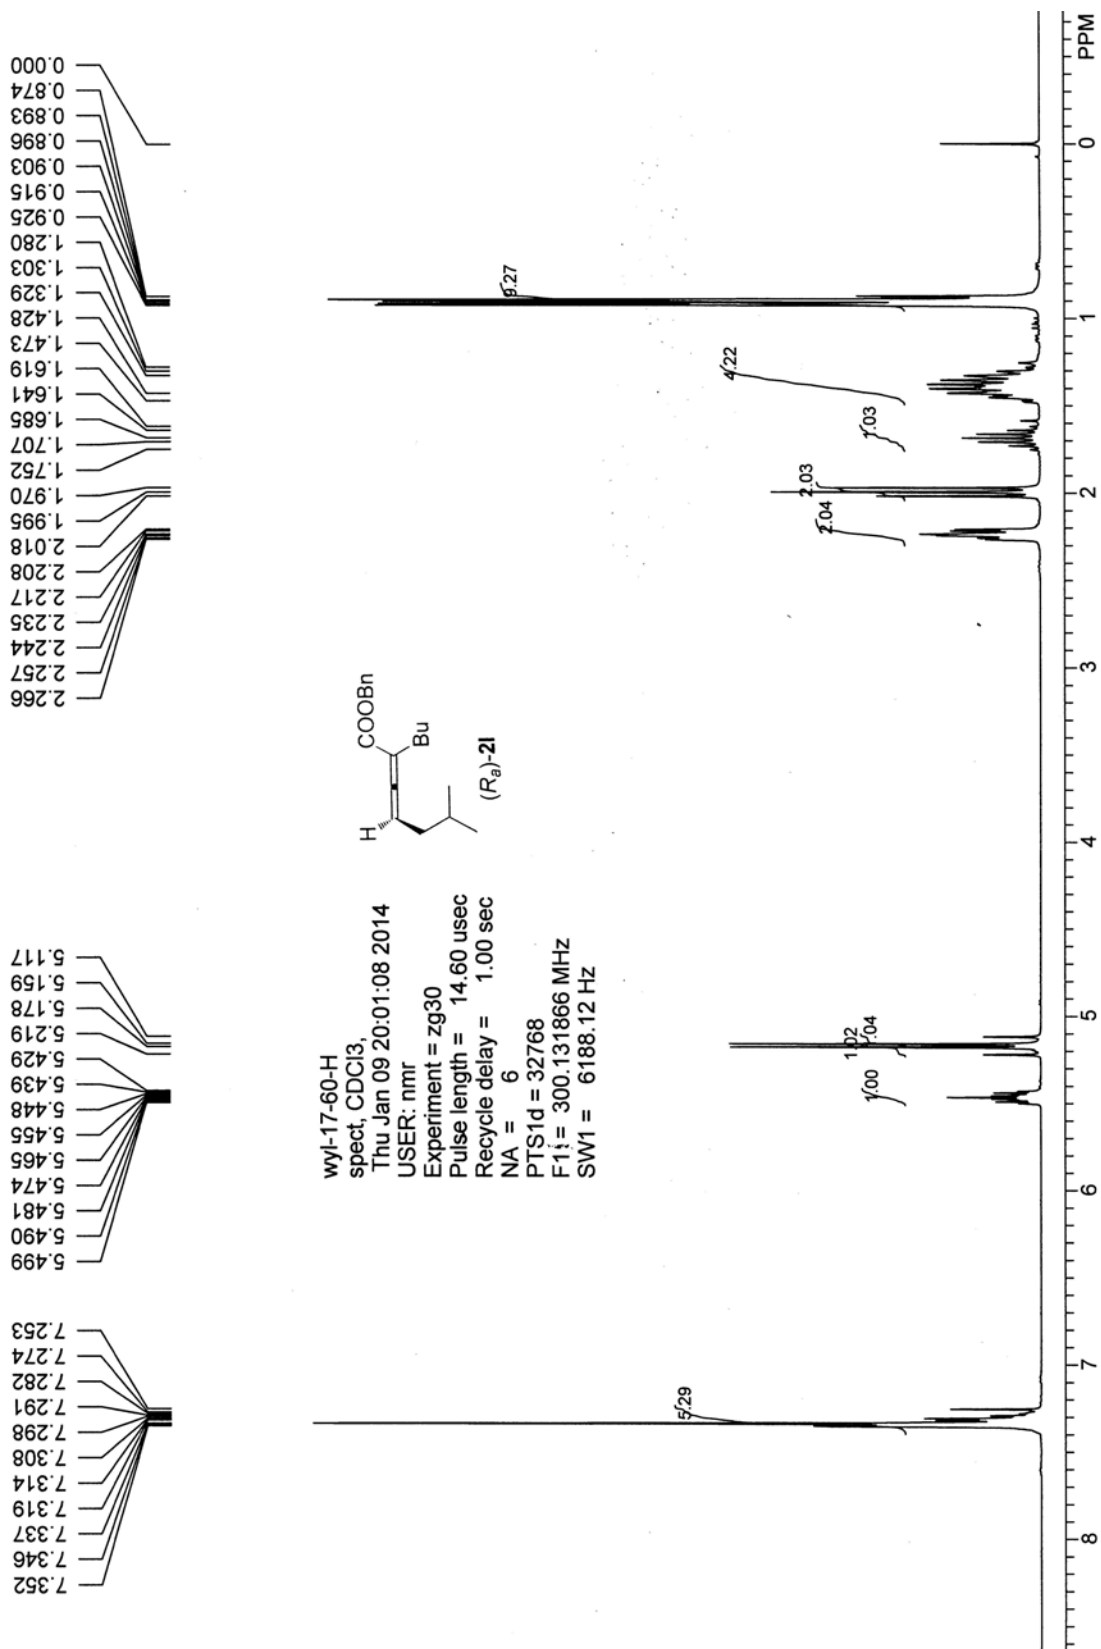

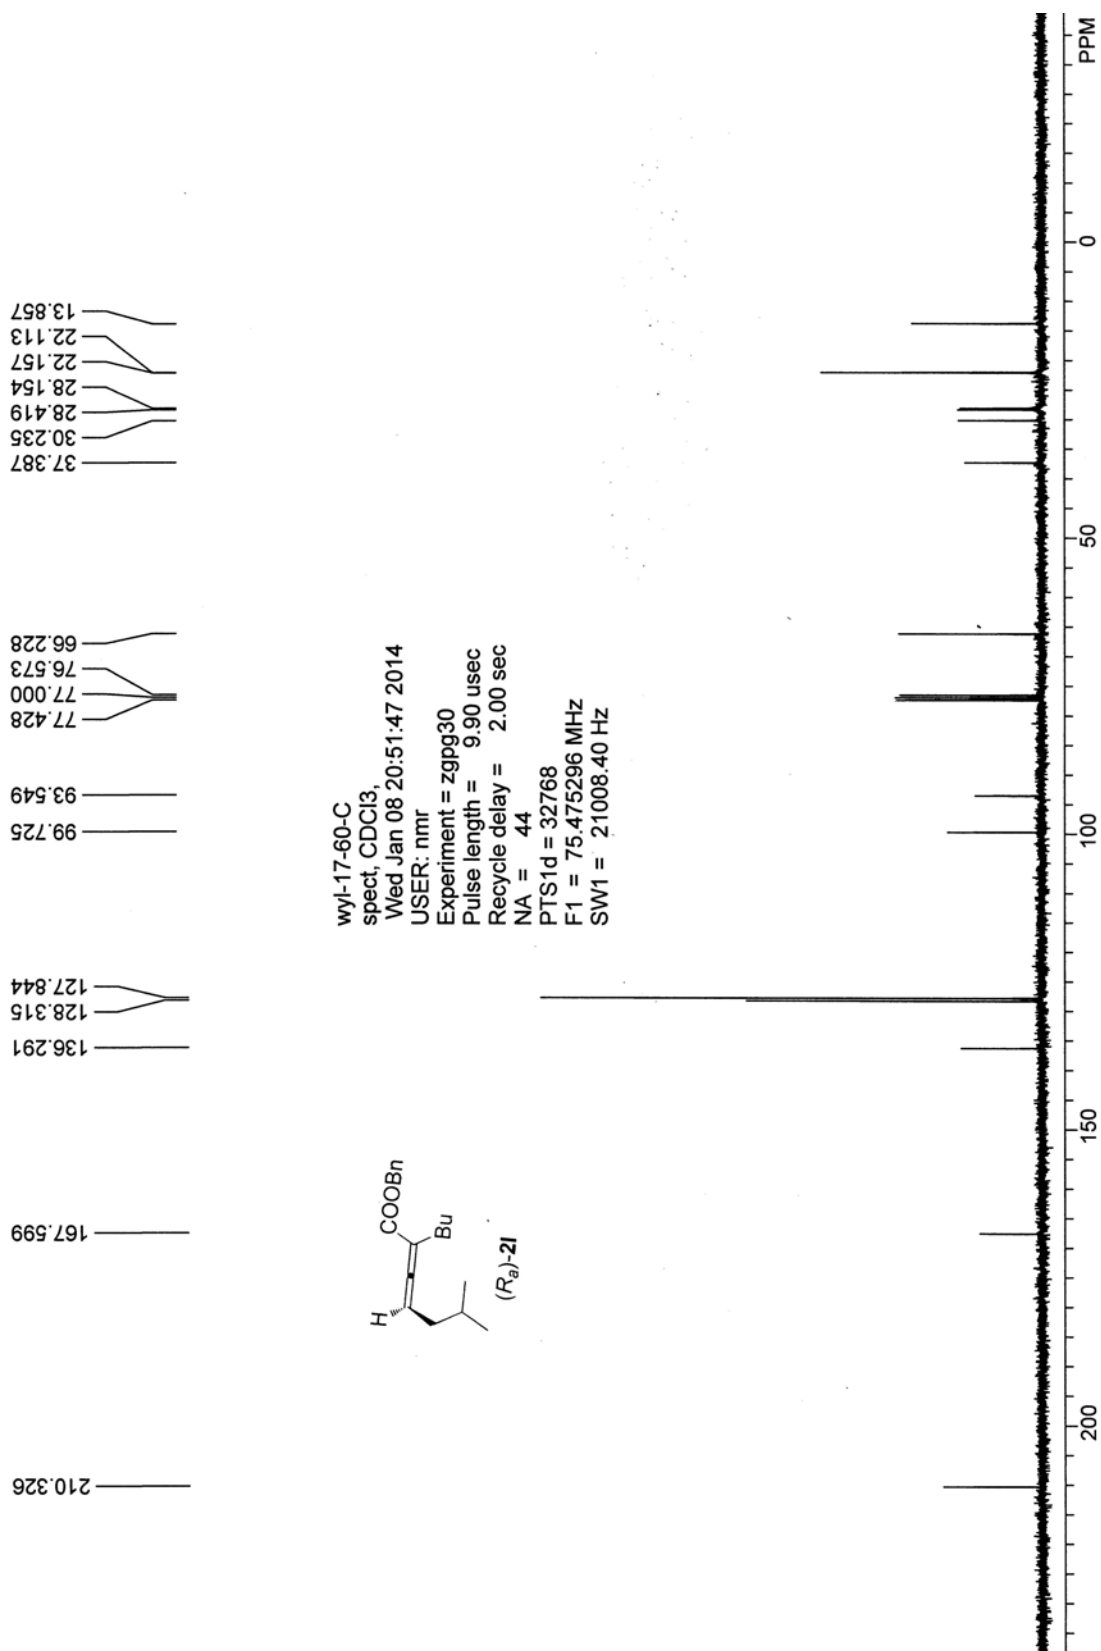

## SAMPLE INFORMATION

Sample Name: wyl-17-60-whale-400-1-1-214  
Sample Type: 未知  
Vial: 1  
Injection #: 12  
Injection Volume: 10.00  $\mu$ l  
Run Time: 20.00 MinutesAcquired By: Breeze  
Date Acquired: 2013/12/31 11:37:04 CST  
Acq. Method: zg100  
Date Processed: 2013/12/31 12:35:33 CST  
Channel Name: V02489 ChA  
Sample Set Name: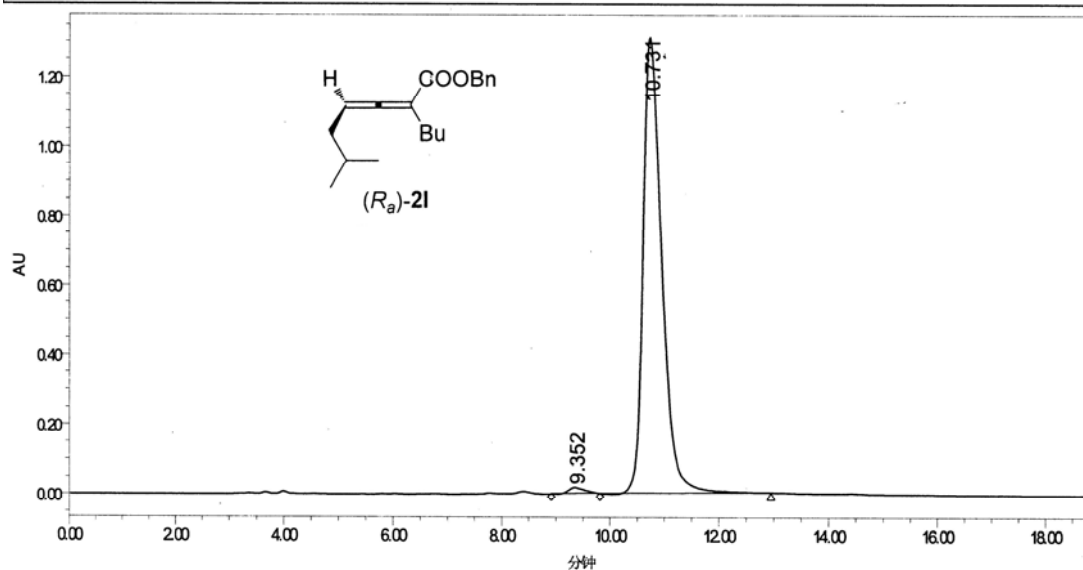

|   | RT<br>(min) | Area<br>(峰面积) | %Area | Height<br>(峰高) | %<br>Height |
|---|-------------|---------------|-------|----------------|-------------|
| 1 | 9.352       | 344067        | 1.08  | 16448          | 1.24        |
| 2 | 10.731      | 31370880      | 98.92 | 1307711        | 98.76       |



## SAMPLE INFORMATION

|                   |                              |                  |                         |
|-------------------|------------------------------|------------------|-------------------------|
| Sample Name:      | wyl-16-135-whalk-400-1-1-214 | Acquired By:     | Breeze                  |
| Sample Type:      | 未知                           | Date Acquired:   | 2013/12/31 10:33:43 CST |
| Vial:             | 1                            | Acq. Method:     | zg100                   |
| Injection#:       | 9                            | Date Processed:  | 2013/12/31 16:46:47 CST |
| Injection Volume: | 10.00 u                      | Channel Name:    | V02489 ChA              |
| Run Time:         | 60.00 Minutes                | Sample Set Name: |                         |

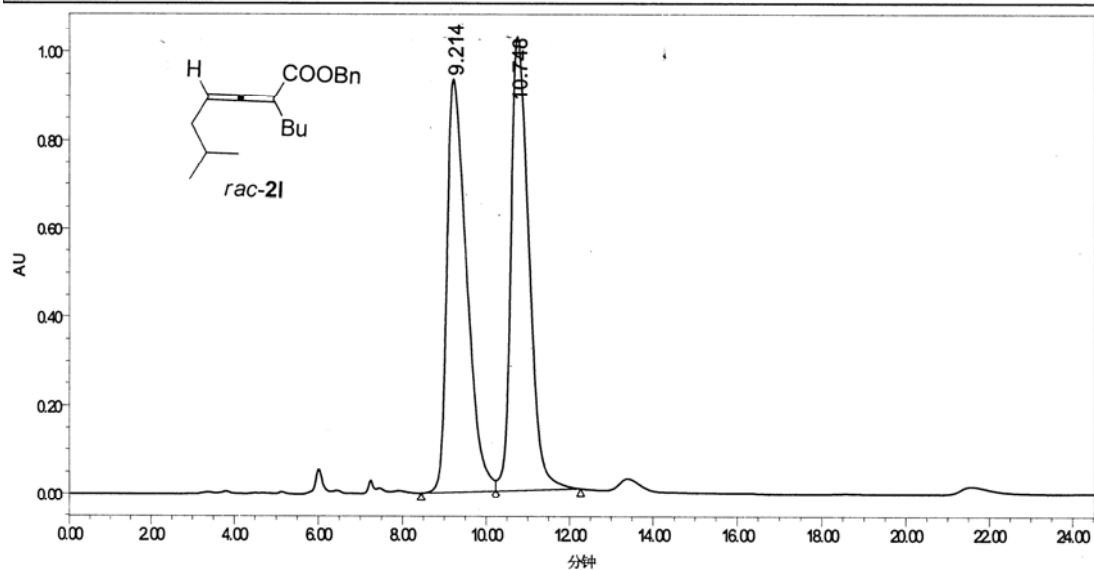

|   | RT<br>(min) | Area<br>(msec) | %Area | Height<br>(msec) | %<br>Height |
|---|-------------|----------------|-------|------------------|-------------|
| 1 | 9.214       | 30609681       | 49.79 | 935143           | 47.70       |
| 2 | 10.748      | 30870399       | 50.21 | 1025188          | 52.30       |

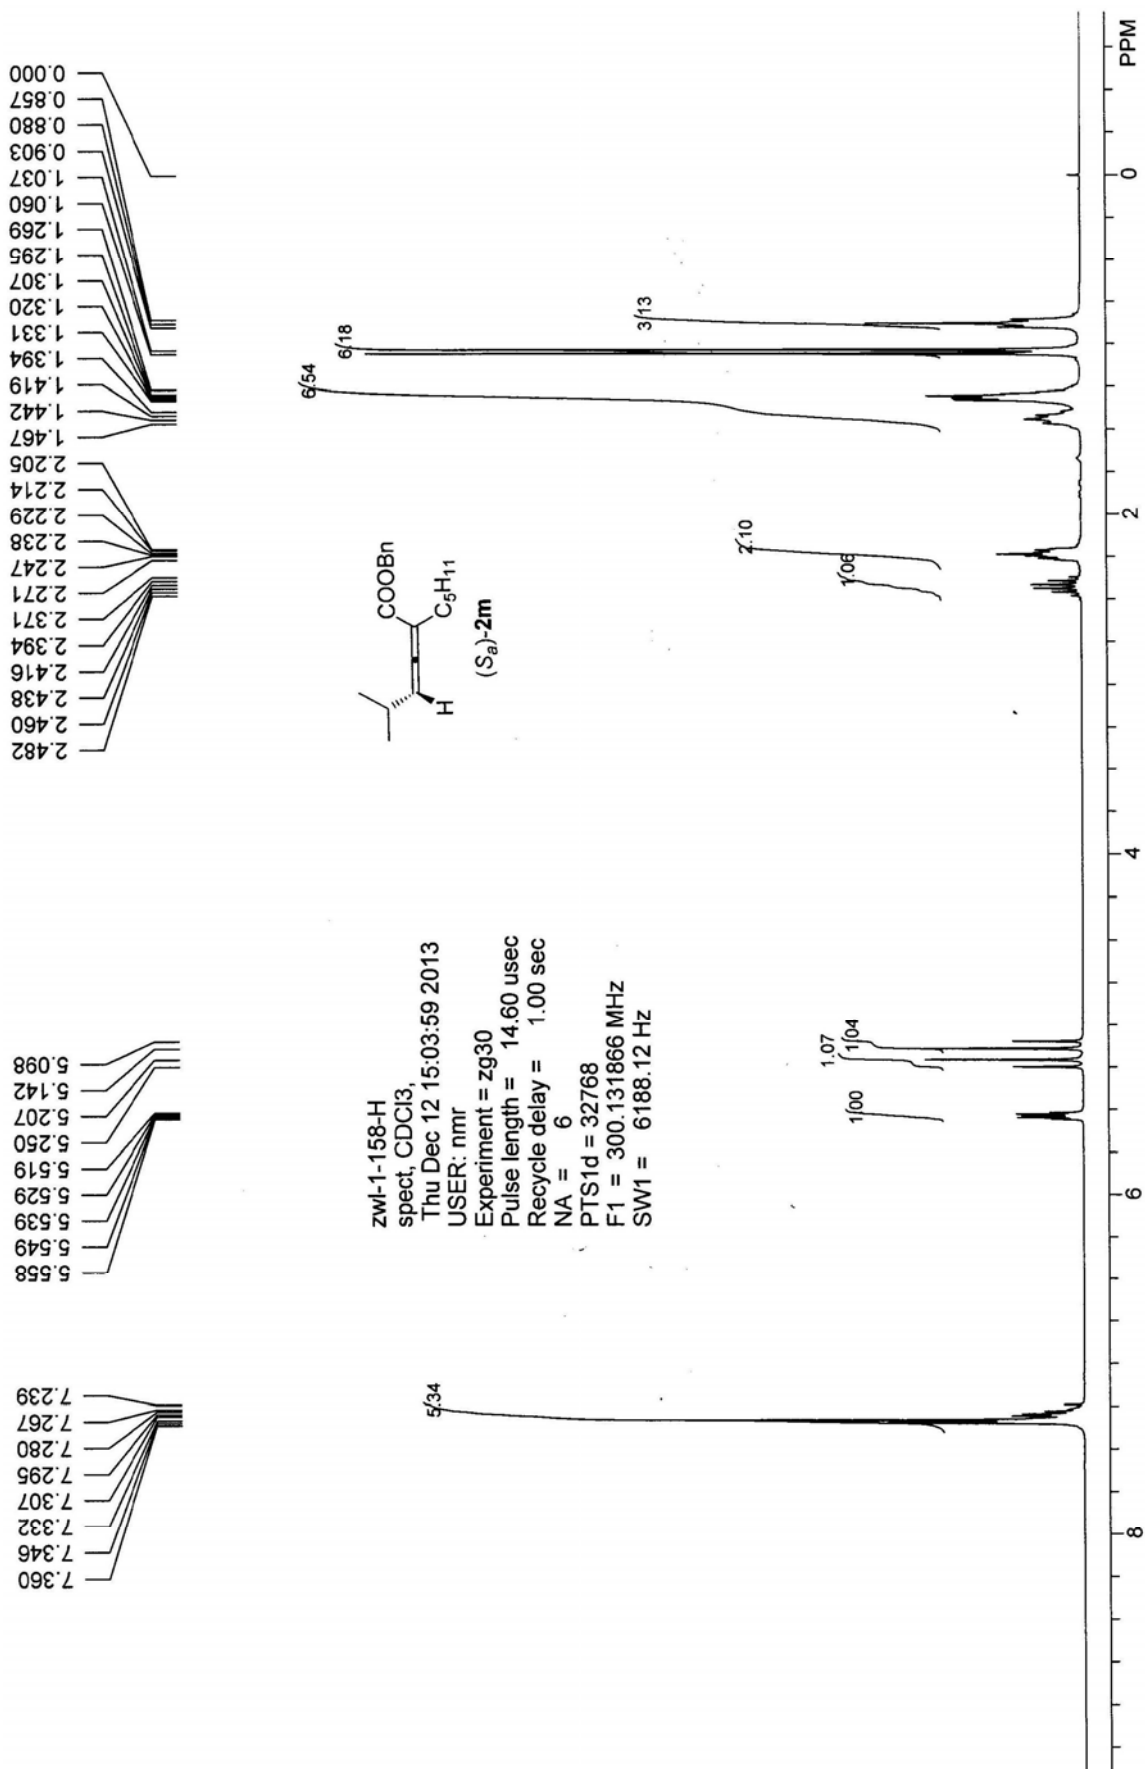

zwl-1-158-H  
 spect, CDCl<sub>3</sub>,  
 Thu Dec 12 15:03:59 2013  
 USER: nmr  
 Experiment = zg30  
 Pulse length = 14.60 usec  
 Recycle delay = 1.00 sec  
 NA = 6  
 PTS1d = 32768  
 F1 = 300.131866 MHz  
 SW1 = 6188.12 Hz

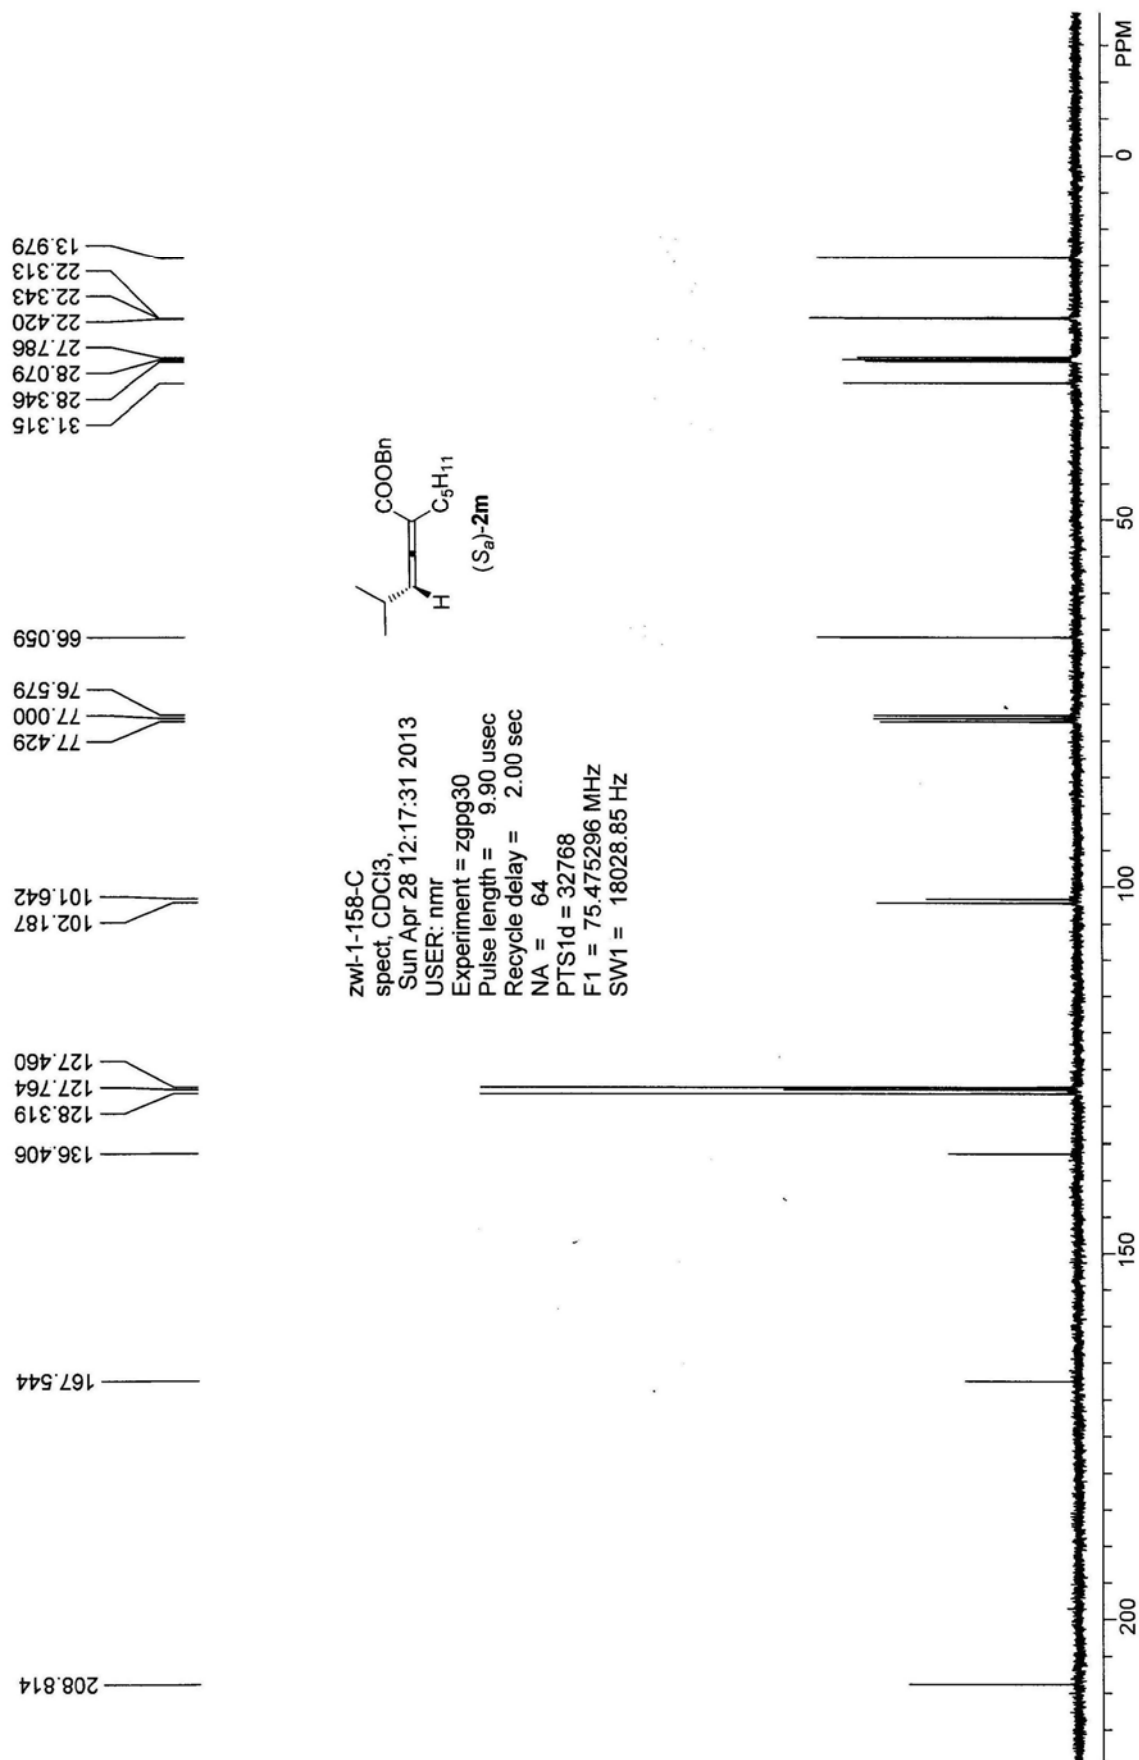

# zw1-1-158-whelk-s, s-200-1-0.5-214

实验时间: 2013-04-28, 13:51:31

报告时间: 2013-04-28, 14:28:39

谱图文件: D:\zhuguangjiong\zw1\20130428\zw1-1-158-whelk-s, s-200-1-0.5-214..org

实验内容简介:  
whelk-s, s 200+1  
0.5ml/min 214nm

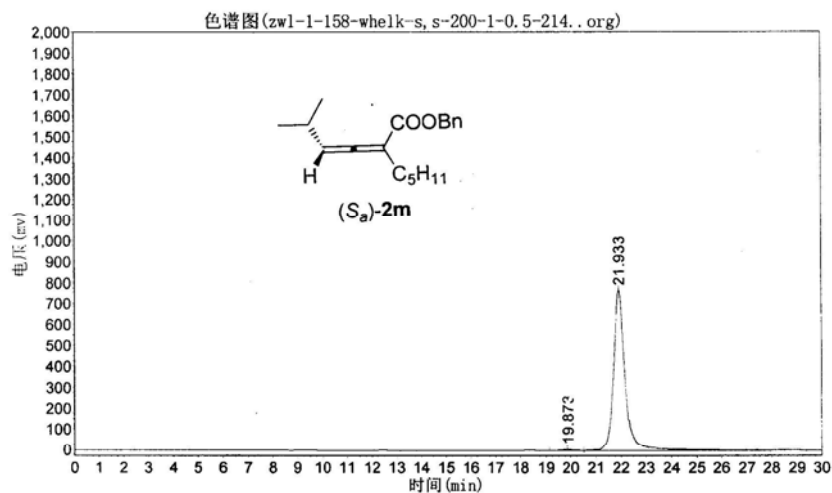

分析结果表

| 峰号 | 峰名 | 保留时间   | 峰高         | 峰面积          | 含量       |
|----|----|--------|------------|--------------|----------|
| 1  |    | 19.873 | 6011.043   | 160463.172   | 0.6266   |
| 2  |    | 21.933 | 767171.063 | 25447982.000 | 99.3734  |
| 总计 |    |        | 773182.105 | 25608445.172 | 100.0000 |

# zw1-1-159-whelk-s, s-200-1-0.5-214

实验时间: 2013-04-28, 12:43:50

报告时间: 2013-04-28, 13:42:19

谱图文件: D:\zhuguangjiong\zw1\20130428\zw1-1-159-whelk-s, s-200-1-0.5-214. org

实验内容简介:  
whelk-s, s 200+1  
0.5ml/min 214nm

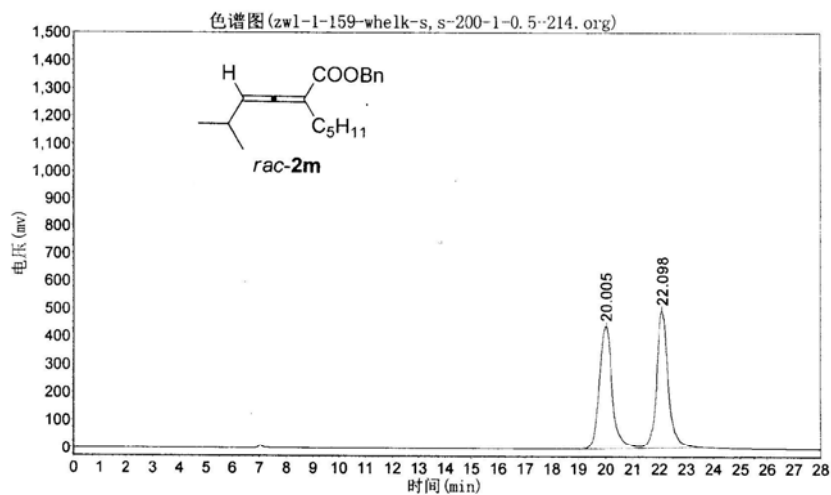

分析结果表

| 峰号 | 峰名 | 保留时间   | 峰高         | 峰面积          | 含量       |
|----|----|--------|------------|--------------|----------|
| 1  |    | 20.005 | 439468.469 | 14792792.000 | 49.5197  |
| 2  |    | 22.098 | 492610.281 | 15079771.000 | 50.4803  |
| 总计 |    |        | 932078.750 | 29872563.000 | 100.0000 |

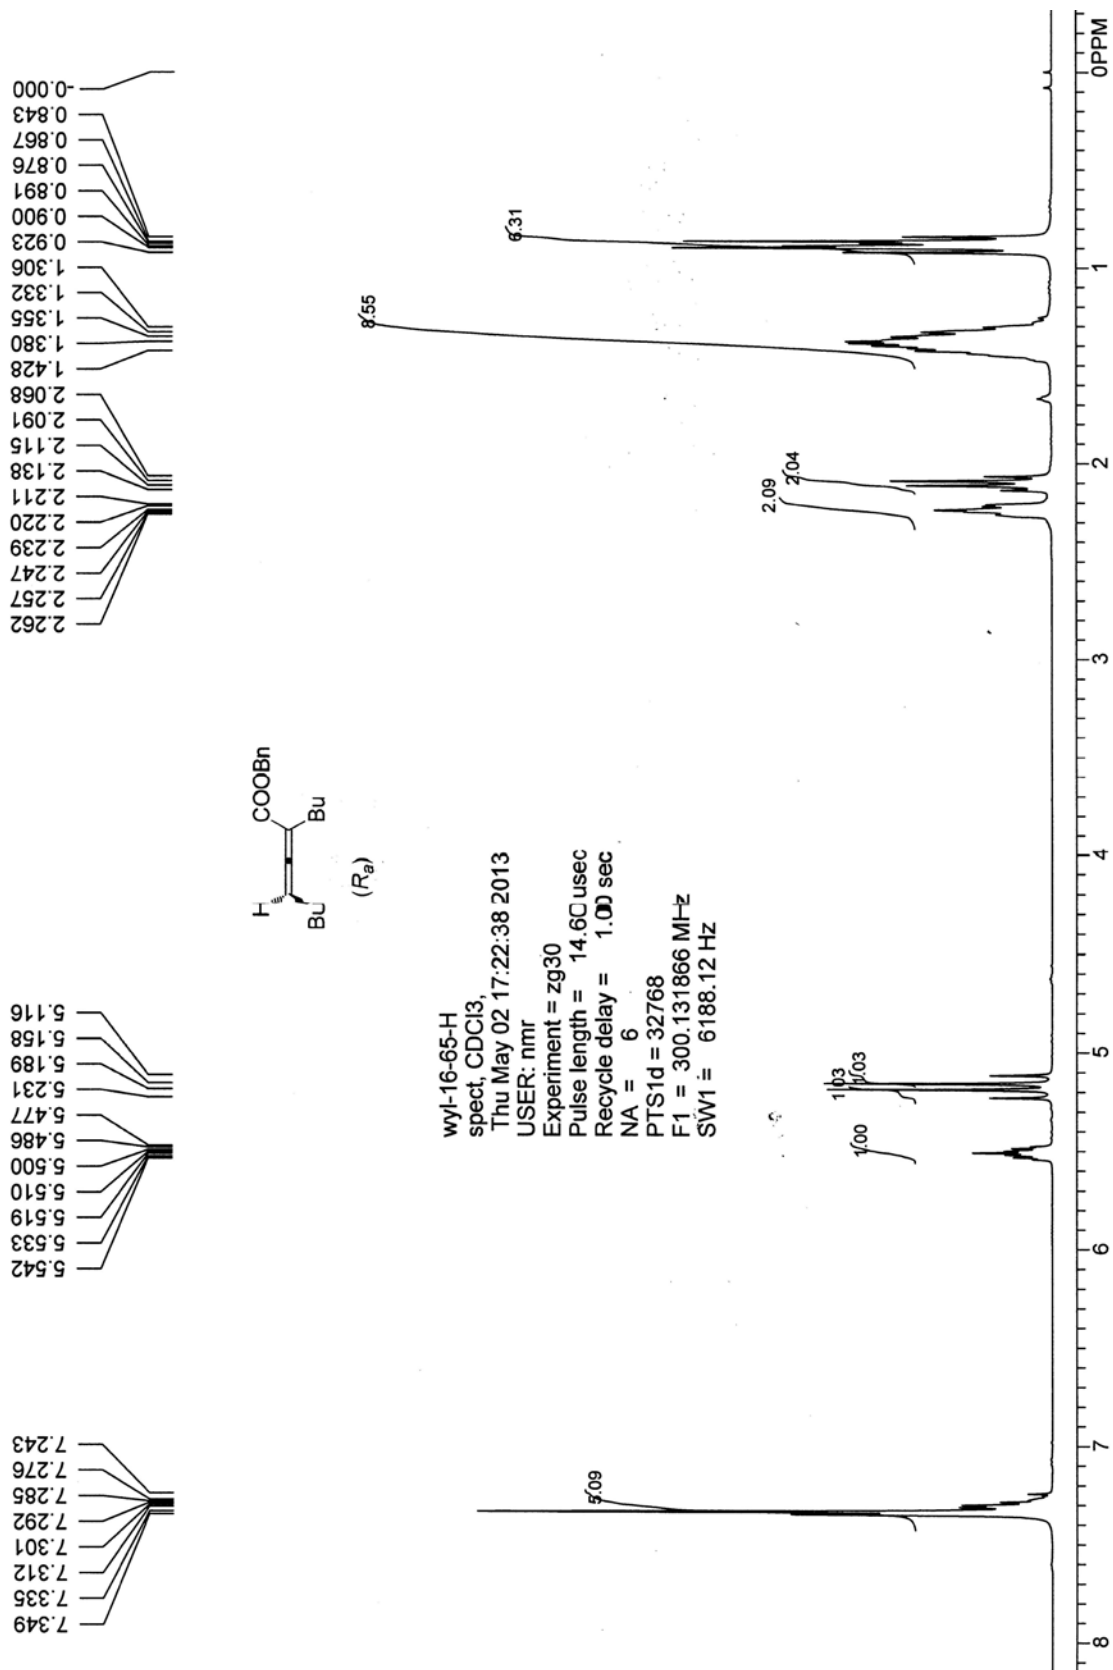

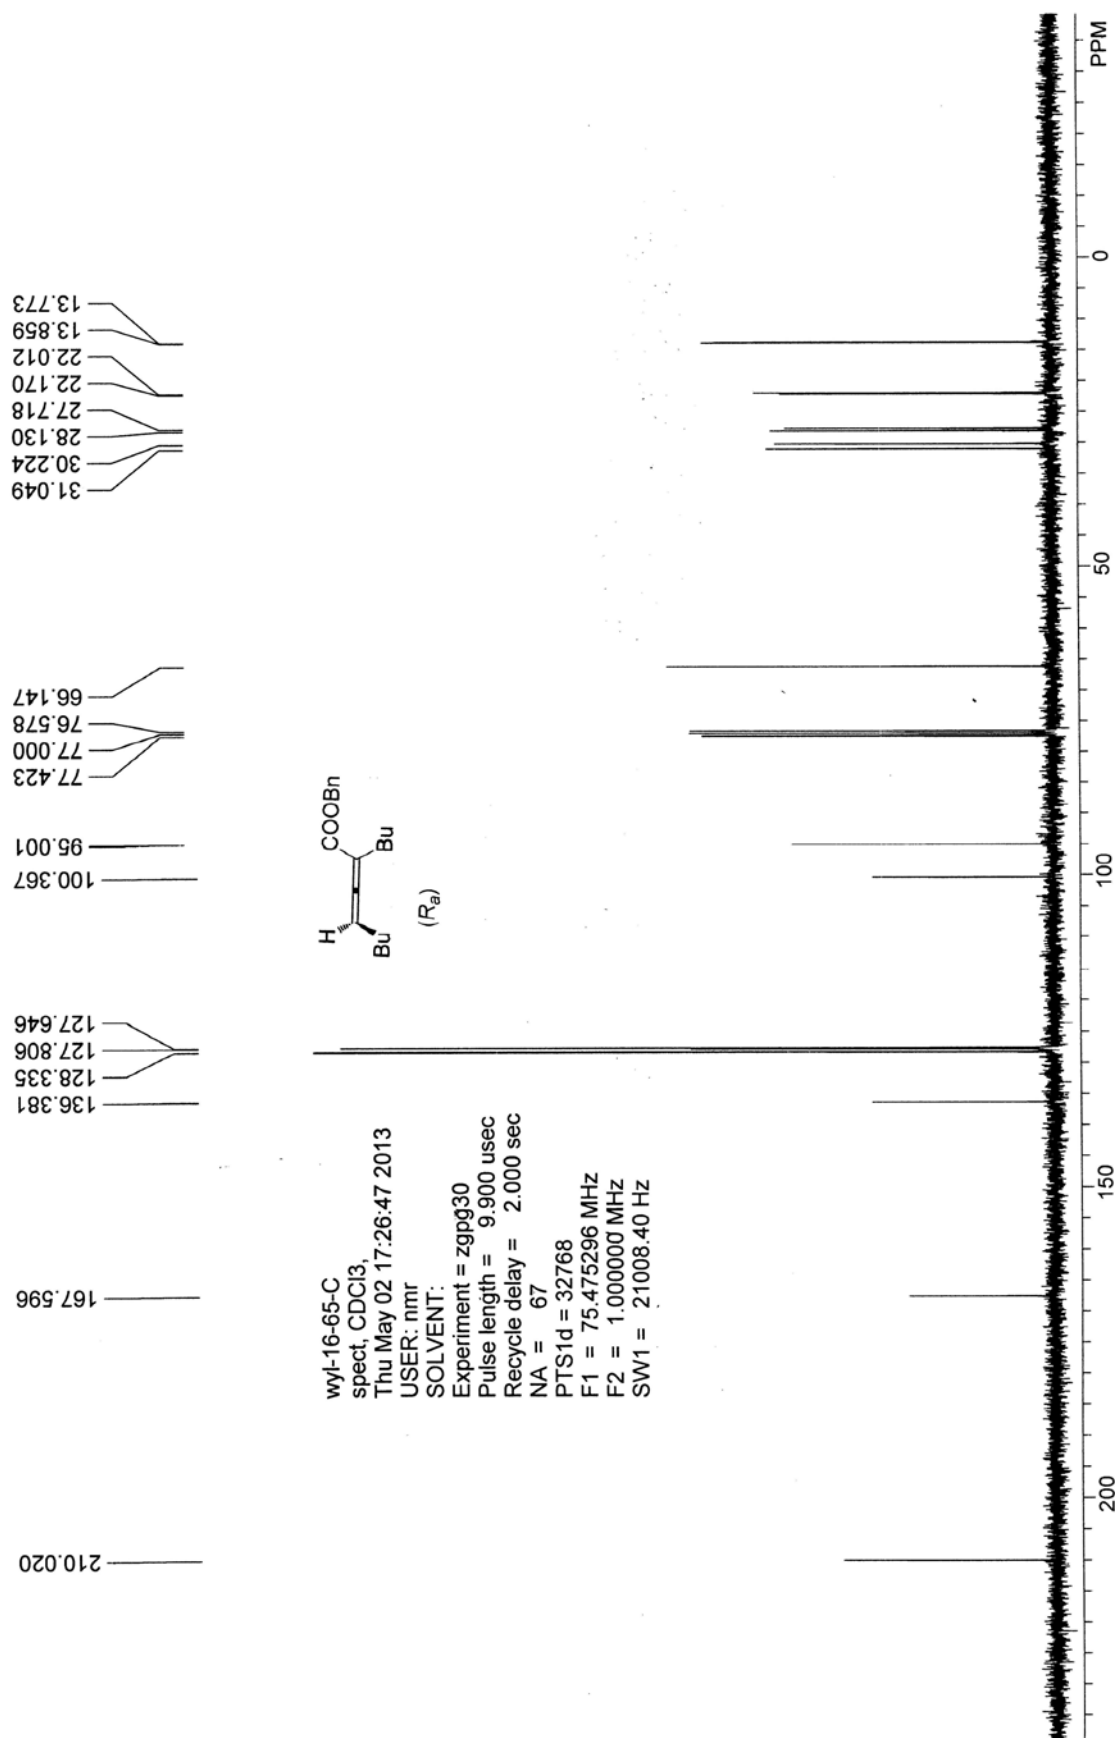

实验时间: 2013-05-02, 11:28:26

报告时间: 2013-05-02, 13:31:47

谱图文件: D:\zhuguangjiong\wyl\20130502\wyl-16-65-wheelk-s, s-200-1-1-214. .org

实验内容简介:  
wheelk-s, s 200+1  
1ml/min 214nm

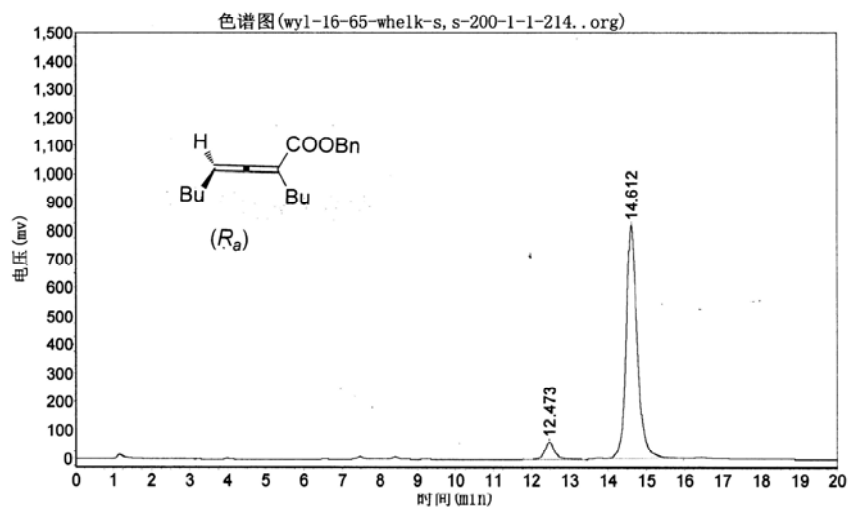

分析结果表

| 峰号 | 峰名 | 保留时间   | 峰高         | 峰面积          | 含量       |
|----|----|--------|------------|--------------|----------|
| 1  |    | 12.473 | 63753.641  | 1192039.375  | 6.6915   |
| 2  |    | 14.612 | 818372.250 | 16622253.000 | 93.3085  |
| 总计 |    |        | 882125.891 | 17814292.375 | 100.0000 |



实验时间: 2013-05-02, 12:10:06

报告时间: 2013-05-02, 13:30:09

谱图文件: D:\zhuguangjiong\wyl\20130502\wyl-16-66-wheelk-s, s-200-1-1-214. .org

实验内容简介:  
wheelk-s, s 200+1  
1ml/min 214nm

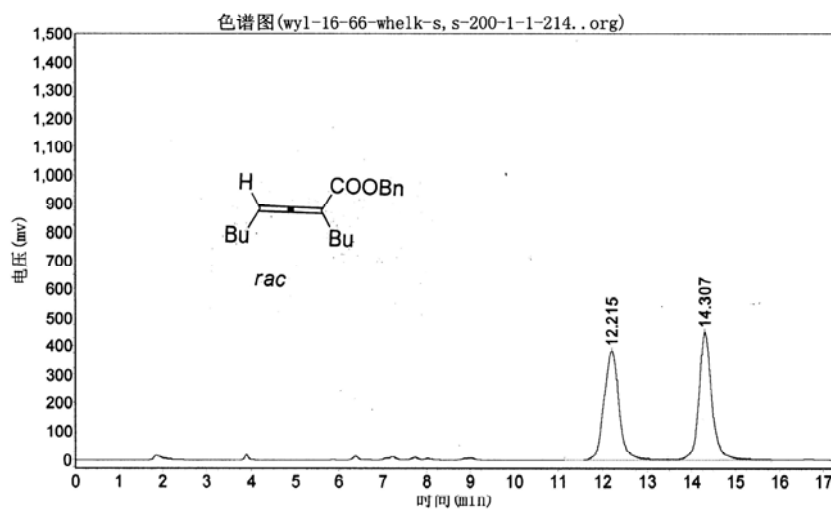

分析结果表

| 峰号 | 峰名 | 保留时间   | 峰高         | 峰面积          | 含量       |
|----|----|--------|------------|--------------|----------|
| 1  |    | 12.215 | 381762.719 | 9162743.000  | 49.9487  |
| 2  |    | 14.307 | 449652.094 | 9181581.000  | 50.0513  |
| 总计 |    |        | 831414.813 | 18344324.000 | 100.0000 |
